# Supplementary material
Source: publisher figshare collection journal article supplement (https://acs.figshare.com/ndownloader/files/4172446)

# Supporting Information:

## **Sml<sub>2</sub>-Mediated Coupling of Nitrones and *tert*-Butanesulfinyl Imines with Allenates: Synthesis of $\beta$ -Methylenyl- $\gamma$ -Lactams and Tetramic Acids**

**Chu-Pei Xu,<sup>[a],[b]</sup> Pei-Qiang Huang\*<sup>[b]</sup> and Sandrine Py\*<sup>[a]</sup>**

<sup>a</sup> *Département de Chimie Moléculaire (SERCO) UMR 5250, ICMG FR-2607, CNRS-Université Joseph Fourier, BP 53, 38041 Grenoble Cedex 09, France*

<sup>b</sup> *Department of Chemistry and Fujian Provincial Key Laboratory of Chemical Biology, College of Chemistry and Chemical Engineering, Xiamen University, Xiamen 361005, P. R. China*

[sandrine.py@ujf-grenoble.fr](mailto:sandrine.py@ujf-grenoble.fr)

[pqhuang@xmu.edu.cn](mailto:pqhuang@xmu.edu.cn)

|                                                                               |                |
|-------------------------------------------------------------------------------|----------------|
| 1- General experimental methods                                               | <b>S2</b>      |
| 2- Preparation of 0.1 M solution of SmI <sub>2</sub> in THF                   | <b>S2</b>      |
| 3- Typical experimental procedures                                            | <b>S3-S6</b>   |
| 4- Preparation and characterization of new compounds                          | <b>S7-S16</b>  |
| 5- Copies of <sup>1</sup> H and <sup>13</sup> C NMR spectra for new compounds | <b>S16-S68</b> |

## 1- General experimental methods

All reactions were performed under an atmosphere of dry argon in flame dried glassware equipped with a magnetic stir bar. Schlenk tube technique was used for SmI<sub>2</sub>-mediated reactions. THF was distilled from sodium/benzophenone, DMF from CaH<sub>2</sub>. THF, HFIP, *t*-BuOH and H<sub>2</sub>O used in SmI<sub>2</sub>-mediated reactions were degassed by freeze and thaw method. Reactions were monitored by thin layer chromatography (TLC) using commercial aluminum-backed silica gel plates (Merck Kiesegel 60 PF<sub>254</sub>). TLC spots were viewed under UV light at 254 nm and by heating the plate after treatment with a staining agent (KMnO<sub>4</sub> or triphenyl tetrazolium chloride). Product purification by gravity column chromatography was performed using Merck Silica Gel 60 (70-230 mesh). Infrared spectra were obtained on a Nicolet Avatar 330 FT-IR spectrometer (spectrometer A) using KBr pellets or on a Nicolet 'Magna 550' spectrometer (spectrometer B) using an ATR (Attenuated Total Reflexion) module. The data are reported in reciprocal centimeters (cm<sup>-1</sup>). <sup>1</sup>H NMR and <sup>13</sup>C NMR spectra were recorded in CDCl<sub>3</sub>, chemical shifts for <sup>1</sup>H spectra are values from tetramethylsilane in CDCl<sub>3</sub> ( $\delta$  0.00), chemical shifts for <sup>13</sup>C spectra are values from CDCl<sub>3</sub> ( $\delta$  77.16). <sup>1</sup>H NMR spectra are reported as follows: chemical shift (ppm), multiplicity (br: broad; s: singlet; d: doublet; t: triplet; q: quadruplet; m: multiplet, app t: apparent triplet), integration and coupling constants (Hz). Low resolution mass spectra (LRMS) were recorded on a Bruker Esquire 3000+ spectrometer. High resolution mass spectra (HRMS) were recorded on a Thermoquest Orbitrap spectrometer. Optical rotations were determined with a Perkin-Elmer 341 polarimeter. Melting points were measured using a Yanaco MP-500 micro melting point apparatus and were not corrected.

## 2- Preparation of 0.1 M solution of SmI<sub>2</sub> in THF

Distilled and degassed THF (50 mL) was added to samarium metal (4 g) under inert atmosphere. The resulting suspension was cooled down to 0 °C then sublimated iodine (5 g) was added. The temperature was allowed to reach room temperature and distilled and degassed THF (150 mL) was added. The suspension was stirred at room temperature until the appearance of typical blue color.

### 3- Typical experimental procedures

#### 3.1 Screening of conditions for cross coupling of nitrone **1a** and allenolate **3a**

According to the conditions previously described for the reductive coupling of nitrones with acrylic esters, nitrone **1a** and allenolate **3a** (1.4 equiv) were first treated with 3 equiv SmI<sub>2</sub> in the presence of degassed water, at –78 °C.<sup>1</sup> Under these conditions, the expected *N*-hydroxyamine **4aa** was formed (30%), nitrone **1a** was recovered (44%) along with a major side-product (**6a**), resulting from the reduction of allenolate **3a** by SmI<sub>2</sub> (see Table, entry 1). Performing the reaction at –40 °C did not induce any significant change in the distribution of the products (see Table, entry 2).

In light of the work of Ellman,<sup>2</sup> who observed that both lithium bromide and water should be used as additives for achieving high yields and good diastereoselectivities in the SmI<sub>2</sub>-mediated reductive coupling of methyl methacrylate with a *N*-*tert*-butanesulfinyl imine, we next introduced 12 equivalents of this salt in the reaction mixture (see Table, entry 3). The yield of **4aa** being increased (to 50%) in the presence of LiBr, further optimizations were performed in its presence.

The effect of different proton sources on the cross coupling of nitrone **1a** with allenolate **3a** was next investigated. When water was replaced by hexafluoroisopropanol,<sup>3</sup> a non-coordinating proton source, the yield in **4aa** was significantly improved (see Table, entries 4, 5). *Tert*-butanol, a less expensive, and also non-coordinating additive, proved to have a similar effect (see table, entry 6).

The competitive conjugate reduction of allenolate **3a** by SmI<sub>2</sub>, being the major side reaction hampering the isolation of the desired products in high yields, it was thus decided to introduce the starting allenolate **3a** and SmI<sub>2</sub>, in several sequential portions (see Table, entries 5-7). When 1.4 equiv of allenolate and the nitrone were reacted first in the presence of 3.5 equiv of *tert*-butanol, 12 equiv of LiBr and 3 equiv of SmI<sub>2</sub>, followed by addition of 0.6 equiv of allenolate and 1 equiv of SmI<sub>2</sub>, then another 0.5 equiv of allenolate and 0.5 equiv of SmI<sub>2</sub>, the desired product **4aa** was obtained in 80% yield (see Table, entry 7). Progressive introduction of the allenolate by using a syringe-pump did not allow to isolate **4aa** in a better yield (see Table, entry 8).

---

<sup>1</sup> When an equimolar mixture of nitrone **1a** and allenolate **3a** were treated by 2 equiv SmI<sub>2</sub> at –78 °C, with no additive, only trace amount of hydroxylamine **4aa** was detected by NMR, the major isolated products being [3+2] cycloadducts.

<sup>2</sup> Peltier, H. M.; McMahon, J. P.; Patterson, A. W.; Ellman, J. A. *J. Am. Chem. Soc.* **2006**, *128*, 16018-16019.

<sup>3</sup> (a) Nicolaou, K. C.; Li, A.; Edmonds, D. J.; Tria, G. S.; Ellery, S. P. *J. Am. Chem. Soc.* **2009**, *131*, 16905–16918; (b) Nicolaou, K. C.; Li, A.; Edmonds, D. J. *Angew. Chem. Int. Ed.* **2006**, *45*, 7086-7090.

**Table.** Screening of conditions for the SmI<sub>2</sub>-mediated cross-coupling reaction of **1a** and **3a**

| entry          | <b>3a</b> (equiv) | <b>SmI<sub>2</sub></b> (equiv) | additives (equiv)             | T (°C)    | t (h) | <b>4aa</b> (%) | <b>6a<sup>c</sup></b> (%) |
|----------------|-------------------|--------------------------------|-------------------------------|-----------|-------|----------------|---------------------------|
| 1 <sup>a</sup> | 1.4               | 3                              | H <sub>2</sub> O (8)          | −78 to rt | 2     | <b>30</b>      | 86                        |
| 2 <sup>b</sup> | 1.4               | 3.5                            | H <sub>2</sub> O (8)          | −40       | 16.5  | <b>30</b>      | 82                        |
| 3 <sup>b</sup> | 1.4               | 3.5                            | H <sub>2</sub> O (8) LiBr(12) | −40       | 1     | <b>49</b>      | 50                        |
| 4 <sup>b</sup> | 1.4               | 3                              | HFIP (3) LiBr(12)             | −40       | 0.2   | <b>60</b>      | 51                        |
| 5 <sup>c</sup> | 2                 | 4                              | HFIP (3) LiBr(12)             | −40       | 0.5   | <b>65</b>      | 123                       |
| 6 <sup>c</sup> | 2                 | 3.5                            | <i>t</i> -BuOH (3) LiBr(12)   | −40       | 2.5   | <b>75</b>      | 94                        |
| 7 <sup>c</sup> | 2.5               | 4.5                            | <i>t</i> -BuOH (3.5) LiBr(12) | −40       | 3     | <b>80</b>      | 164                       |
| 8              | 1+1 <sup>d</sup>  | 4                              | <i>t</i> -BuOH (3.5) LiBr(12) | −40       | 1.3   | <b>60</b>      | 93                        |

<sup>a</sup>SmI<sub>2</sub> was added to a solution of **1a**, **3a** and water in THF at −78 °C, then the temperature was allowed to reach room temperature.<sup>b</sup>SmI<sub>2</sub> was added to the solution of **1a** (and LiBr) at −40 °C, then the solution of **3a** and water (or HFIP) in THF was added, in one portion.<sup>c</sup>See general procedure below.<sup>d</sup>The second portion of allenolate **3a** was added progressively using a syringe pump.<sup>e</sup>The yields of **6a** were calculated based on the starting nitron **1a**.

### 3.2 Typical procedure for the optimized cross coupling of nitrones and allenolates (cf. Table, entry 7): conditions A

(*Z*)-*N*-(2-methylpropylidene)-1-phenylmethanamine-*N*-oxide **1a**<sup>4</sup> (30.7 mg, 0.17 mmol) and LiBr (180 mg, 2.1 mmol) was dissolved in THF (2 mL) under Ar, and the distilled *t*-BuOH (57 μL, 0.60 mmol) was added, then the solution was cooled to −40 °C. Then a solution of allenolate **3a**<sup>5</sup> (42.1 mg, 0.24 mmol) in THF (2.2 mL) was added slowly at −40 °C. Thereafter SmI<sub>2</sub> (3 equiv 5.2 mL) was added slowly (in 1.5 min). 30 min later, TLC showed no more starting allene. Then **3a** (18.1 mg, 0.10 mmol) in THF (1.0 mL) was added slowly at −40 °C. The solution turned yellow, then another 1 equiv SmI<sub>2</sub> (1.8 mL) was added. 30 min later, TLC showed the allene was consumed, and the nitron was more dilute. Then 0.5 equiv allene in THF (0.8 mL) was added, followed by the addition of 0.5 equiv SmI<sub>2</sub> (0.9 mL). 1.2 h later, the saturated Na<sub>2</sub>S<sub>2</sub>O<sub>3</sub> (10 mL) and saturated NaHCO<sub>3</sub> (5 mL) were added. Then the mixture was extracted with EtOAc (3 × 15 mL). The combined organic layers were dried over MgSO<sub>4</sub> and concentrated under reduced pressure. Purification by column chromatography

<sup>4</sup> Dondoni, A.; Franco, S.; Junquera, F.; Merchan, F.; Merino, P.; Tejero, T. *Synth. Commun.* **1994**, *24*, 2537-2550.<sup>5</sup> Rout, L.; Harned, A. M. *Chem. Eur. J.* **2009**, *15*, 12926-12928.

on silica gel (EtOAc/Pentane 3/97 → EtOAc/Pentane 1/6 → DCM/MeOH 95/5) gave a colorless oil **4aa** (49 mg, 80%), the recovered **1a** (4.8 mg, 16%) and **6a**<sup>6</sup> (50 mg).

### 3.3 Typical procedure for the optimized cross coupling of *t*-BS-imines and allenates: conditions B

(*E*)-2-Methyl-*N*-(2-methylpropylidene)propane-2-sulfinamide **2a**<sup>7</sup> (80 mg, 0.46 mmol) and LiBr (476 mg, 5.48 mmol) were dissolved in THF (2 mL) under Ar, then the solution was cooled to −40 °C. Then allenate **3a**<sup>5</sup> (198.8 mg, 1.14 mmol) in THF (2.2 mL) was added at −40 °C, followed by the addition of *t*-BuOH (152.0 µL, 1.60 mmol). Thereafter SmI<sub>2</sub> (3 equiv 13.7 mL) was added dropwise. 30 min later, allenate **3a** (47.7 mg, 0.27 mmol) in THF (1.0 mL) was added slowly at −40 °C. Then another 1 equiv SmI<sub>2</sub> (4.6 mL) was added. 30 min later, 0.5 equiv allenate **3a** in THF (0.8 mL) was added, followed by the addition of 0.5 equiv SmI<sub>2</sub> (2.3 mL). 3 h later, the saturated Na<sub>2</sub>S<sub>2</sub>O<sub>3</sub> (15 mL) and saturated NaHCO<sub>3</sub> (5 mL) were added. Then the mixture was extracted with EtOAc (3 × 15 mL). The combined organic layers were dried over Na<sub>2</sub>SO<sub>4</sub> and concentrated under reduced pressure. Purification by column chromatography on silica gel (EtOAc/Hexane 1/30 → 1/6 → 2/3) gave a yellow oil **11a** (136.5 mg, 85%, dr = 5:1). The diastereomers could not be separated at this stage.

### 3.4 Typical procedure for cyclisation of *N*-hydroxyamino esters **4** into lactams **5**

To a mixture of **4aa** (35 mg, 0.1 mmol) and zinc dust (77 mg, 1.2 mmol) was added glacial acetic acid (2 mL). The solution was heated to 80 °C and treated with ultrasonic. 1 h later, TLC showed **4aa** was consumed. Then, 15 mL of saturated NaHCO<sub>3</sub> was added to the solution carefully, and the NaHCO<sub>3</sub> powder was added till the bubble ceased. The mixture was extracted with EtOAc (3 × 15 mL). The combined organic layers were dried over MgSO<sub>4</sub> and concentrated under reduced pressure. Purification by column chromatography on silica gel (EtOAc/Pentane 1/4 → EtOAc/Pentane 1/1) gave a colorless oil **5a** (22.6 mg, 99%).

---

<sup>6</sup> Belanger, D.; Tong, X.; Soumare, S.; Dory, Y. L.; Zhao, Y. *Chem. Eur. J.* **2009**, *15*, 4428 – 4436.

<sup>7</sup> Nielsen, L.; Lindsay, K. B.; Faber, J.; Nielsen, N. C.; Skrydstrup, T. *J. Org. Chem.* **2007**, *72*, 10035-10044.

#### 4. Preparation and characterization of new compounds

##### Benzyl 4-(benzyl(hydroxy)amino)-5-methyl-3-methylenhexanoate (**4aa**)

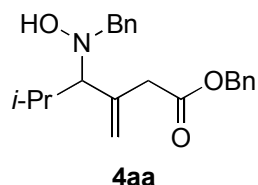

Following the typical procedure A (see 3.2), from nitrone **1a**<sup>4</sup> and allenolate **3a**<sup>5</sup> compound **4aa** was obtained in 80% yield, as a colorless oil, accompanied by the recovered **1a** (16%). IR (neat, spectrometer B)  $\nu_{\max}$ : 3478, 3063, 3031, 2958, 2933, 2870, 1733, 1641, 1603, 1496, 1454, 1423, 1375, 1328, 1268, 1214, 1150, 1002  $\text{cm}^{-1}$ ;  $^1\text{H}$  NMR (300 MHz,  $\text{CDCl}_3$ )  $\delta$ : 7.45-7.20 (m, 10H), 5.26 (d,  $J = 1.0$  Hz, 1H), 5.13 (s, 2H), 5.08 (s, 1H), 4.55 (brs, 1H), 3.92 (d,  $J = 13.5$  Hz, 1H), 3.70 (d,  $J = 13.5$  Hz, 1H), 3.23 (dd,  $J = 15.0, 1.0$  Hz, 1H), 3.15 (d,  $J = 15.0$  Hz, 1H), 2.87 (d,  $J = 8.5$  Hz, 1H), 2.30-2.05 (m, 1H), 1.05 (d,  $J = 6.5$  Hz, 3H), 0.85 (d,  $J = 7.0$  Hz, 3H) ppm;  $^{13}\text{C}$ -NMR (75 MHz,  $\text{CDCl}_3$ )  $\delta$ : 171.7, 139.1, 138.8, 135.9, 129.0, 128.5, 128.3, 128.2, 128.1, 126.9, 119.4, 78.0, 66.4, 61.1, 39.7, 27.9, 20.6, 19.3 ppm; MS (ESI)  $m/z$ : 354  $[(\text{M}+\text{H})^+]$ , 376  $[(\text{M}+\text{Na})^+]$ ; HRMS (ESI,  $m/z$ ) calcd for  $[\text{C}_{22}\text{H}_{28}\text{NO}_3]^+$ : 354.20637; Found: 354.20673.

##### Benzyl 4-(benzyl(hydroxy)amino)-3-methylenepentanoate (**4ba**)

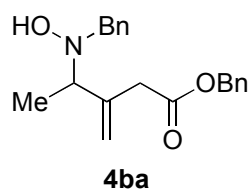

Following the typical procedure A (see 3.2), from nitrone **1b**<sup>8</sup> and allenolate **3a**<sup>5</sup> compound **4ba** was obtained in 68% yield as a colorless oil, accompanied by the recovered **1b** (31%). IR (neat, spectrometer B)  $\nu_{\max}$ : 3449, 3088, 3063, 3031, 2974, 2939, 2876, 1733, 1647, 1600, 1496, 1454, 1375, 1328, 1261, 1211, 1150  $\text{cm}^{-1}$ ;  $^1\text{H}$  NMR (300 MHz,  $\text{CDCl}_3$ )  $\delta$ : 7.39-7.18 (m, 10H), 5.20 (s, 1H), 5.12 (s, 1H), 5.06-5.10 (m, 3H), 3.88 (d,  $J = 13.5$  Hz, 1H), 3.73 (d,  $J = 13.5$  Hz, 1H), 3.33 (q,  $J = 6.5$  Hz, 1H), 3.25 (d,  $J = 15.5$  Hz, 1H), 3.11 (d,  $J = 15.5$  Hz, 1H), 1.26 (d,  $J = 6.5$  Hz, 3H) ppm;  $^{13}\text{C}$ -NMR (75 MHz,  $\text{CDCl}_3$ )  $\delta$ : 172.7, 143.4, 138.5, 135.7, 129.0, 128.5, 128.3, 128.2, 128.1, 127.0, 116.9, 66.7,

<sup>8</sup> Aschwanden, P.; Kværnø, L.; Geisser, R. W.; Kleinbeck, F.; Carreira, E. M. *Org. Lett.* **2005**, 7, 5741-5742.

65.8, 60.0, 39.7, 12.4 ppm; MS (ESI)  $m/z$ : 326 [(M+H)<sup>+</sup>], 348 [(M+Na)<sup>+</sup>]; HRMS (ESI,  $m/z$ ) calcd for [C<sub>20</sub>H<sub>23</sub>NO<sub>3</sub>Na]<sup>+</sup>: 348.15701; Found: 348.15701.

#### Benzyl 4-(benzyl(hydroxy)amino)-3-methylenehexanoate (**4ca**)

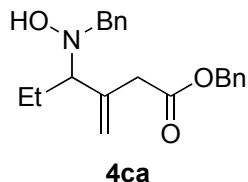

Following the typical procedure A (see 3.2), from nitrone **1c**<sup>9</sup> and allenolate **3a**<sup>5</sup> compound **4ca** was obtained in 74% yield as a colorless oil, accompanied by the recovered **1c** (23%). IR (neat, spectrometer B)  $\nu_{\text{max}}$ : 3460 (br), 3087, 3065, 3033, 2966, 2935, 2877, 2838, 1733, 1647, 1605, 1497, 1454, 1378, 1331, 1268, 1213, 1148, 1029, 1001 cm<sup>-1</sup>; <sup>1</sup>H NMR (300 MHz, CDCl<sub>3</sub>)  $\delta$ : 7.45-7.18 (m, 10H), 5.18 (brs, 1H), 5.17 (s, 1H), 5.16 (s, 1H), 5.09 (s, 2H), 3.80 (s, 1H), 3.79 (s, 1H), 3.22 (dd,  $J$  = 15.5, 1.0 Hz, 1H), 3.17-3.04 (m, 2H), 1.99-1.78 (m, 1H), 1.41-1.60 (m, 1H), 0.83 (t,  $J$  = 7.5 Hz, 3H) ppm; <sup>13</sup>C-NMR (75 MHz, CDCl<sub>3</sub>)  $\delta$ : 172.3, 140.4, 138.6, 135.7, 129.1, 128.5, 128.3, 128.2, 128.1, 126.9, 118.5, 74.6, 66.7, 60.4, 38.1, 21.3, 10.9 ppm; MS (ESI)  $m/z$ : 340 [(M+H)<sup>+</sup>], 362 [(M+Na)<sup>+</sup>], 322 [(M+H-H<sub>2</sub>O)<sup>+</sup>]; HRMS (ESI,  $m/z$ ) calcd for [C<sub>21</sub>H<sub>26</sub>NO<sub>3</sub>]<sup>+</sup>: 340.19072; Found: 340.19090.

#### Benzyl 4-(benzyl(hydroxy)amino)-6-methyl-3-methyleneheptanoate (**4da**)

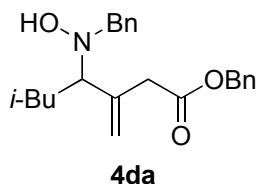

Following the typical procedure A (see 3.2), from nitrone **1d**<sup>4</sup> and allenolate **3a**<sup>5</sup> compound **4da** was obtained in 71% yield as a colorless oil, accompanied by the recovered **1d** (29%). IR (neat, spectrometer B)  $\nu_{\text{max}}$ : 3459, 3088, 3063, 3028, 2952, 2866, 1730, 1496, 1451, 1382, 1366, 1328, 1258, 1214, 1148, 1002 cm<sup>-1</sup>; <sup>1</sup>H NMR (300 MHz, CDCl<sub>3</sub>)  $\delta$ : 7.44-7.18 (m, 10H), 5.20 (s, 1H), 5.17 (s, 1H), 5.09 (s, 2H), 3.85 (d,  $J$  = 13.5 Hz, 1H), 3.77 (d,  $J$  = 13.5 Hz, 1H), 3.36-3.26 (m, 1H), 3.26 (d,  $J$  = 15.5 Hz, 1H), 3.10 (d,  $J$  = 15.5 Hz, 1H), 1.67-1.45 (m, 3H), 0.91 (d,  $J$  = 6.5 Hz, 3H), 0.86 (d,  $J$  = 6.5 Hz, 3H) ppm; <sup>13</sup>C-NMR (75 MHz, CDCl<sub>3</sub>)  $\delta$ : 172.4, 140.7, 138.4, 135.7, 129.1, 128.5, 128.3, 128.2, 128.1, 127.0, 118.6, 70.7, 66.7, 60.2, 38.4, 37.2, 25.1, 23.8, 21.7 ppm; MS (ESI)  $m/z$ : 368.2

<sup>9</sup> Evans, D. A.; Song, H. -J.; Fandrick, K. R.; *Org. Lett.* **2006**, 8, 3351-3354.

[(M+H)<sup>+</sup>], 390.1 [(M+Na)<sup>+</sup>]; HRMS (ESI, *m/z*) calcd for [C<sub>23</sub>H<sub>29</sub>NO<sub>3</sub>Na]<sup>+</sup>: 390.20396; Found: 390.20416.

**Benzyl 3-((benzyl(hydroxy)amino)(cyclohexyl)methyl)but-3-enoate (4ea)**

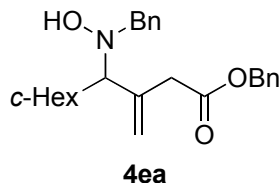

Following the typical procedure A (see 3.2), from nitrone **1e**<sup>8</sup> and allenolate **3a**<sup>5</sup> compound **3ea** was obtained in 62% yield as a colorless oil, accompanied by the recovered **1e** (31%). IR (neat, spectrometer B)  $\nu_{\text{max}}$ : 3477, 3085, 3063, 3031, 2920, 2851, 1730, 1635, 1492, 1451, 1375, 1331, 1214 cm<sup>-1</sup>; <sup>1</sup>H NMR (300 MHz, CDCl<sub>3</sub>)  $\delta$ : 7.42-7.18 (m, 10H), 5.25 (brs, 1H), 5.13 (brs, 2H), 5.05 (s, 1H), 4.57 (s, 1H), 3.90 (d, *J* = 13.5 Hz, 1H), 3.69 (d, *J* = 13.5 Hz, 1H), 3.33 (d, *J* = 15.5 Hz, 1H), 3.15 (d, *J* = 15.5 Hz, 1H), 2.93 (d, *J* = 9.0 Hz, 1H), 2.14-2.01 (m, 1H), 1.92-1.52 (m, 4H), 1.34-0.74 (m, 6H) ppm; <sup>13</sup>C-NMR (75 MHz, CDCl<sub>3</sub>)  $\delta$ : 171.7, 139.0, 138.8, 135.9, 128.9, 128.5, 128.2, 128.1, 128.1, 126.9, 119.4, 76.8, 66.4, 61.0, 39.7, 37.4, 31.0, 29.9, 26.7, 26.3, 26.3 ppm; MS (ESI) *m/z*: 394 [(M+H)<sup>+</sup>], 416 [(M+Na)<sup>+</sup>]; HRMS (ESI, *m/z*) calcd for [C<sub>25</sub>H<sub>31</sub>NO<sub>3</sub>Na]<sup>+</sup>: 416.21962; Found: 416.21937.

**Benzyl 3-((benzyl(hydroxy)amino)(cyclopropyl)methyl)but-3-enoate (4fa)**

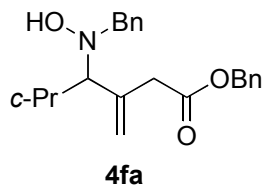

Following the typical procedure A (see 3.2), from nitrone **1f**<sup>10</sup> and allenolate **3a**<sup>5</sup> compound **4fa** was obtained in 56% yield as a colorless oil, accompanied by the recovered **1f** (43%). IR (neat, spectrometer B)  $\nu_{\text{max}}$ : 3449, 3063, 3028, 3003, 2955, 2885, 2841, 1720, 1647, 1603, 1496, 1454, 1375, 1334, 1280, 1261, 1214, 1150, 1030 cm<sup>-1</sup>; <sup>1</sup>H NMR (300 MHz, CDCl<sub>3</sub>)  $\delta$ : 7.48-7.17 (m, 10H), 5.42 (brs, 1H), 5.26 (s, 1H), 5.11 (s, 1H), 5.08 (s, 2H), 4.35 (d, *J* = 13.5 Hz, 1H), 3.74 (d, *J* = 13.5 Hz, 1H), 3.35 (d, *J* = 15.5 Hz, 1H), 3.13 (d, *J* = 15.5 Hz, 1H), 2.41 (d, *J* = 9.5 Hz, 1H), 1.18-1.00 (m, 1H), 0.84-0.70 (m, 1H), 0.63-0.51 (m, 1H), 0.51-0.38 (m, 1H), 0.16-0.02 (m, 1H) ppm; <sup>13</sup>C-NMR (75

<sup>10</sup> Burchak, O. N.; Masson, G.; Py, S. *Synlett*. **2010**, *11*, 1623-1626.



MHz, CDCl<sub>3</sub>)  $\delta$ : 173.1, 142.1, 139.1, 135.6, 128.8, 128.5, 128.3, 128.1, 126.8, 118.2, 77.9, 66.8, 60.1, 39.2, 10.1, 7.8. 2.5 ppm; MS (ESI)  $m/z$ : 352 [(M+H)<sup>+</sup>], 374 [(M+Na)<sup>+</sup>]; HRMS (ESI,  $m/z$ ) calcd for [C<sub>22</sub>H<sub>25</sub>NO<sub>3</sub>Na]<sup>+</sup>: 374.17266; Found: 374.17290.

**Benzyl 4-(benzyl(hydroxy)amino)-5,5-dimethyl-3-methylenehexanoate (4ga)**

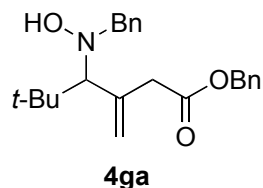

Following the typical procedure A (see 3.2), from nitrone **1g**<sup>8</sup> and allenoate **3a**<sup>5</sup> compound **4ga** was obtained in 44% yield as a colorless oil, accompanied by the recovered **1g** (52%). IR (neat, spectrometer B)  $\nu_{\text{max}}$ : 3493, 3088, 3063, 3031, 2952, 2898, 2866, 1727, 1496, 1454, 1366, 1321, 1306, 1264, 1211, 1179, 1141, 1002 cm<sup>-1</sup>; <sup>1</sup>H NMR (300 MHz, CDCl<sub>3</sub>)  $\delta$ : 7.43-7.20 (m, 10H), 5.29 (s, 1H), 5.22 (s, 1H), 5.14 (s, 2H), 4.33 (s, 1H), 4.00 (d,  $J$  = 13.5 Hz, 1H), 3.66 (d,  $J$  = 13.5 Hz, 1H), 3.45 (dd,  $J$  = 15.5, 0.9 Hz, 1H), 3.24 (dd apparent d,  $J$  = 15.5 Hz, 1H), 2.94 (s, 1H), 1.05 (s, 9H) ppm; <sup>13</sup>C-NMR (75 MHz, CDCl<sub>3</sub>)  $\delta$ : 171.6, 139.1, 138.8, 135.9, 129.1, 128.5, 128.3, 128.2, 127.0, 120.6, 79.3, 66.4, 63.1, 41.7, 35.3, 29.1 ppm; MS (ESI)  $m/z$ : 368 [(M+H)<sup>+</sup>], 390 [(M+Na)<sup>+</sup>]; HRMS (ESI,  $m/z$ ) calcd for [C<sub>23</sub>H<sub>29</sub>NO<sub>3</sub>Na]<sup>+</sup>: 390.20396; Found: 390.20413.

**Benzyl 3-(1-(benzyl(hydroxy)amino)cyclohexyl)but-3-enoate (4ha)**

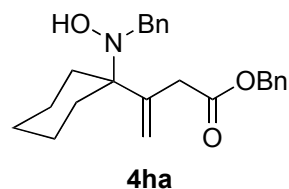

Following the typical procedure A (see 3.2), from nitrone **1h**<sup>11</sup> and allenoate **3a**<sup>5</sup> compound **4ha** was obtained in 26% yield as a colorless oil, accompanied by the recovered **1h** (30%). IR (neat, spectrometer B)  $\nu_{\text{max}}$ : 3465, 3085, 3063, 3028, 2936, 2854, 1730, 1645, 1603, 1496, 1454, 1372, 1325, 1290, 1261, 1211, 1163, 1141, 1068, 1030, 1002 cm<sup>-1</sup>; <sup>1</sup>H NMR (300 MHz, CDCl<sub>3</sub>)  $\delta$ : 7.49-7.17 (m, 10H), 5.37 (s, 1H), 5.31 (s, 1H), 5.05 (s, 2H), 4.56 (br s, 1H), 3.77 (s, 2H), 3.28 (s, 2H), 1.20-2.24 (m, 10H) ppm; <sup>13</sup>C-NMR (75 MHz, CDCl<sub>3</sub>)  $\delta$ : 172.6, 141.9, 139.9, 135.9, 129.1, 128.5, 128.3, 128.2,

<sup>11</sup> Franco, S.; Merchán, F. L.; Merino, P.; Tejero, T. *Synth. Commun.* **1995**, 25, 2275-2284.

128.1, 126.7, 119.6, 67.3, 66.6, 55.3, 38.7, 29.9, 26.5, 22.7 ppm; MS (ESI)  $m/z$ : 380 [(M+H)<sup>+</sup>]; HRMS (ESI,  $m/z$ ) calcd for [C<sub>24</sub>H<sub>29</sub>NO<sub>3</sub>Na]<sup>+</sup>: 402.20396; Found: 402.20433.

**Ethyl 4-(benzyl(hydroxy)amino)-5-methyl-3-methylenhexanoate (4ab)**

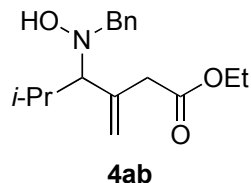

Following the typical procedure A (see 3.2), from nitrone **1a**<sup>4</sup> and allenolate **3b**<sup>5</sup>, compound **4ab** was obtained in 64% yield as a colorless oil, accompanied by the recovered **1a** (33%). IR (neat, spectrometer B)  $\nu_{\text{max}}$ : 3421, 3088, 3063, 3031, 2984, 2958, 2898, 2873, 2844, 1704, 1499, 1451, 1366, 1302, 1252, 1150, 1125, 1093, 1071, 1027 cm<sup>-1</sup>; <sup>1</sup>H NMR (300 MHz, CDCl<sub>3</sub>)  $\delta$ : 7.43-7.20 (m, 5H), 5.27 (s, 1H), 5.09 (s, 1H), 4.65 (s, 1H), 4.15 (q,  $J$  = 7.0 Hz, 2H), 3.93 (d,  $J$  = 13.5 Hz, 1H), 3.72 (d,  $J$  = 13.5 Hz, 1H), 3.27 (dd,  $J$  = 15.5, 1.0 Hz, 1H), 3.09 (d,  $J$  = 15.5 Hz, 1H), 2.88 (d,  $J$  = 8.5 Hz, 1H), 2.29-2.10 (m, 1H), 1.26 (t,  $J$  = 7.0 Hz, 3H), 1.06 (d,  $J$  = 6.5 Hz, 3H), 0.87 (d,  $J$  = 6.5 Hz, 3H) ppm; <sup>13</sup>C-NMR (75 MHz, CDCl<sub>3</sub>)  $\delta$ : 171.9, 139.3, 138.9, 128.9, 128.2, 126.9, 119.0, 77.9, 61.1, 60.6, 39.8, 27.9, 20.6, 19.3, 14.2 ppm; MS (ESI)  $m/z$ : 292 [(M+H)<sup>+</sup>], 314 [(M+Na)<sup>+</sup>], 274 [(M+H-H<sub>2</sub>O)<sup>+</sup>]; HRMS (ESI,  $m/z$ ) calcd for [C<sub>17</sub>H<sub>26</sub>NO<sub>3</sub>]<sup>+</sup>: 292.19072; Found: 292.19103.

***tert*-Butyl 4-(benzyl(hydroxy)amino)-5-methyl-3-methylenhexanoate (4ac)**

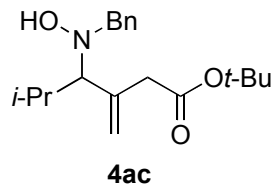

Following the typical procedure A (see 3.2), from nitrone **1a**<sup>4</sup> and allenolate **3c**<sup>12</sup> compound **4ac** was obtained in 32% yield as a colorless oil, accompanied by the recovered **1a** (52%). IR (neat, spectrometer B)  $\nu_{\text{max}}$ : 3474, 3066, 3028, 2974, 2930, 2870, 1723, 1638, 1603, 1492, 1454, 1391, 1363, 1331, 1280, 1252, 1144, 1030 cm<sup>-1</sup>; <sup>1</sup>H NMR (300 MHz, CDCl<sub>3</sub>)  $\delta$ : 7.42-7.18 (m, 5H), 5.27 (brs, 1H), 5.08 (s, 1H), 4.69 (s, 1H), 3.95 (d,  $J$  = 13.5 Hz, 1H), 3.73 (d,  $J$  = 13.5 Hz, 1H), 3.18 (d,  $J$  = 15.0 Hz, 1H), 3.00 (d,  $J$  = 15.0 Hz, 1H), 2.88 (d,  $J$  = 8.5 Hz, 1H), 2.26-2.10 (m, 1H), 1.46 (s, 9H), 1.05 (d,  $J$  = 6.5 Hz, 3H), 0.87 (d,  $J$  = 7.0 Hz, 3H) ppm; <sup>13</sup>C-NMR (75 MHz, CDCl<sub>3</sub>)  $\delta$ : 171.4, 139.8, 139.0, 129.0,

<sup>12</sup> Takagi, K.; Tomita, I.; Endo, T. *Polym. Bull.*, **2003**, 50, 335-342.

128.2, 126.9, 118.6, 80.6, 78.2, 61.2, 40.8, 28.1, 27.9, 20.6, 19.1 ppm; MS (ESI)  $m/z$ : 320 [(M+H)<sup>+</sup>], 342 [(M+Na)<sup>+</sup>]; HRMS (ESI,  $m/z$ ) calcd for [C<sub>19</sub>H<sub>29</sub>NO<sub>3</sub>Na]<sup>+</sup>: 342.20396; Found: 342.20390.

***tert*-Butyl 4-(benzyl(hydroxy)amino)-3-methylenehexanoate (4cc)**

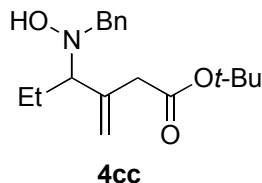

Following the typical procedure A (see 3.2), from nitrone **1c**<sup>9</sup> and allenolate **3c**<sup>12</sup> compound **4cc** was obtained in 36% yield as a colorless oil. Recovered **1c** was not quantified. IR (neat, spectrometer B)  $\nu_{\text{max}}$ : 3433, 3088, 3063, 3028, 2977, 2930, 2876, 1723, 1644, 1603, 1492, 1454, 1391, 1366, 1334, 1277, 1255, 1144, 1068, 1027 cm<sup>-1</sup>; <sup>1</sup>H NMR (300 MHz, CDCl<sub>3</sub>)  $\delta$ : 7.50-7.10 (m, 5H), 5.32 (s, 1H), 5.25-5.15 (m, 2H), 3.85 (s, 2H), 3.20-3.05 (m, 2H), 2.95 (d,  $J$  = 15.5 Hz, 1H), 1.98-1.80 (m, 1H), 1.44 (s, 9H), 0.85 (t,  $J$  = 7.5 Hz, 3H) ppm; <sup>13</sup>C-NMR (75 MHz, CDCl<sub>3</sub>)  $\delta$ : 172.0, 141.0, 138.7, 129.1, 128.1, 126.9, 117.9, 80.9, 74.9, 60.4, 39.0, 28.0, 21.4, 10.9 ppm; MS (ESI)  $m/z$ : 306 [(M+H)<sup>+</sup>], 328 [(M+Na)<sup>+</sup>]; HRMS (ESI,  $m/z$ ) calcd for [C<sub>18</sub>H<sub>27</sub>NO<sub>3</sub>Na]<sup>+</sup>: 328.18831; Found: 328.18832.

**Ethyl 4-(benzyl(hydroxy)amino)-2,5-dimethyl-3-methylenehexanoate (8)**

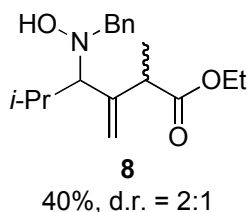

Following the typical procedure A (see 3.2), from nitrone **1a**<sup>4</sup> and allenolate **7**<sup>13</sup> compound **8** was obtained in 40% yield as a colorless oil (dr = 2:1), accompanied by the recovered **1a** (46%). IR (neat, spectrometer B)  $\nu_{\text{max}}$ : 3478, 3088, 3063, 3031, 2977, 2955, 2936, 2872, 1727, 1635, 1496, 1454, 1366, 1242, 1182, 1093, 1027 cm<sup>-1</sup>; Major diastereoisomer: <sup>1</sup>H NMR (300 MHz, CDCl<sub>3</sub>)  $\delta$ : 7.20-7.50 (m, 5H), 5.43 (s, 1H), 5.22 (s, 1H), 4.36 (s, 1H), 4.25-4.10 (m, 2H), 3.97 (d,  $J$  = 12.0 Hz, 1H), 3.65 (d,  $J$  = 12.0 Hz, 1H), 3.44-3.29 (m, 1H), 3.06-2.93 (m, 1H), 2.35-2.13 (m, 1H), 1.45-1.35 (m, 3H), 1.33-1.22 (m, 3H), 1.15-1.05 (m, 3H), 0.95-0.87 (m, 3H) ppm; <sup>13</sup>C-NMR (75 MHz, CDCl<sub>3</sub>)  $\delta$ : 174.9, 145.5, 139.1, 128.9, 128.2, 127.0, 116.6, 77.8, 61.2, 60.6, 44.3, 28.8, 20.4, 19.2, 17.6, 14.1 ppm; Minor diastereoisomer: <sup>1</sup>H NMR (300 MHz, CDCl<sub>3</sub>)  $\delta$ : 7.20-7.50 (m, 5H), 5.38 (s, 1H), 5.16 (s, 1H), 4.76 (s,

<sup>13</sup> Jung, M. E.; Nishimura, N. *Org. Lett.*, **2001**, 3, 2113–2115.

1H), 4.25-4.10 (m, 2H), 3.89 (d,  $J$  = 15.0 Hz, 1H), 3.78 (d,  $J$  = 15.0 Hz, 1H), 3.44-3.29 (m, 1H), 3.06-2.93 (m, 1H), 2.35-2.13 (m, 1H), 1.45-1.35 (m, 3H), 1.33-1.22 (m, 3H), 1.15-1.05 (m, 3H), 0.95-0.87 (m, 3H) ppm;  $^{13}\text{C}$ -NMR (75 MHz,  $\text{CDCl}_3$ )  $\delta$ : 174.8, 145.2, 139.0, 128.9, 128.2, 126.9, 117.0, 77.5, 60.6, 60.5, 43.7, 28.5, 20.7, 19.3, 17.9, 14.2 ppm; MS (ESI)  $m/z$ : 306  $[(\text{M}+\text{H})^+]$ ; HRMS (ESI,  $m/z$ ) calcd for  $[\text{C}_{18}\text{H}_{27}\text{NO}_3\text{Na}]^+$ : 328.18831; Found: 328.18807.

### Preparation of benzyl 4-methylpenta-2,3-dienote (**9**)

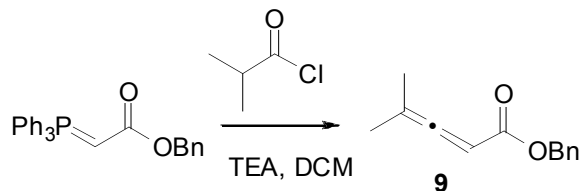

To a stirring solution of isobutyryl chloride (0.81 mL, 7.67 mmol) and  $\text{CH}_2\text{Cl}_2$  (18 mL) under Ar, at 0 °C, was added Et<sub>3</sub>N (1.22 mL, 8.41 mmol) dropwise via cannula. When the addition was complete, the ice bath was removed and the reaction mixture warmed to rt. To the reaction mixture was slowly added a solution of stabilized ylide benzyl 2-(triphenylphosphoranylidene)acetate (3 g, 7.31 mmol) in  $\text{CH}_2\text{Cl}_2$  (10 mL) dropwise via cannula and the mixture was stirred at rt overnight, then concentrated under reduced pressure to afford a gummy residue. This was treated with pentane/ether (50/8, 58 mL) and stirred well, then the solid was filtered and washed with pentane ( $2 \times 10$  mL). Then the filtrate was concentrated under reduced pressure. Purification by column chromatography on silica gel (eluent: Et<sub>2</sub>O/Pentane 1/10) afforded allenoate **9** (500 mg, 33%) as a colorless oil. IR (neat, spectrometer B)  $\nu_{\text{max}}$ : 3063, 3034, 2984, 2942, 2911, 1964, 1717, 1496, 1451, 1404, 1245, 1147, 1021  $\text{cm}^{-1}$ ;  $^1\text{H}$  NMR (300 MHz,  $\text{CDCl}_3$ )  $\delta$ : 7.40-7.27 (m, 5H), 5.50 (sept,  $J$  = 3.0 Hz, 1H), 5.17 (s, 2H), 1.80 (d,  $J$  = 3.0 Hz, 6H) ppm;  $^{13}\text{C}$ -NMR (75 MHz,  $\text{CDCl}_3$ )  $\delta$ : 211.0, 166.4, 136.2, 128.4, 128.0, 128.0, 100.3, 85.9, 66.2, 19.2 ppm; MS (ESI)  $m/z$ : 225  $[(\text{M}+\text{Na})^+]$ ; HRMS (ESI,  $m/z$ ) calcd for  $[\text{C}_{13}\text{H}_{14}\text{O}_2\text{Na}]^+$ : 225.08860; Found: 225.08852.

### Benzyl 4-(benzyl(hydroxy)amino)-5-methyl-3-(propan-2-ylidene)hexanoate (**10**)

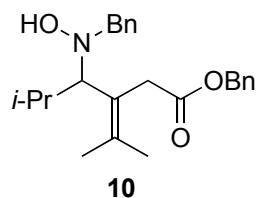

Following the typical procedure A (see 3.2), from nitrone **1a**<sup>4</sup> and allenolate **9**, compound **10** was obtained in 22% yield as a colorless oil, accompanied by the recovered **1a** (70%). IR (neat, spectrometer B)  $\nu_{\text{max}}$ : 3474, 3088, 3063, 3031, 2958, 2933, 2866, 1730, 1499, 1451, 1372, 1331, 1258, 1214, 1147, 1030, 1005  $\text{cm}^{-1}$ ;  $^1\text{H}$  NMR (300 MHz,  $\text{CDCl}_3$ )  $\delta$ : 7.44-7.18 (m, 10H), 5.14 (d,  $J = 12.0$  Hz, 1H), 5.08 (d,  $J = 12.0$  Hz, 1H), 4.98 (brs, 1H), 3.95 (d,  $J = 14.0$  Hz, 1H), 3.77 (d,  $J = 14.0$  Hz, 1H), 3.52-3.24 (m, 3H), 2.30-2.10 (m, 1H), 1.73 (s, 3H), 1.71 (s, 3H), 1.05 (d,  $J = 6.5$  Hz, 3H), 0.89 (d,  $J = 6.5$  Hz, 3H) ppm;  $^{13}\text{C}$ -NMR (75 MHz,  $\text{CDCl}_3$ )  $\delta$ : 173.0, 139.4, 136.1, 136.0, 128.9, 128.5, 128.3, 128.1, 128.0, 126.7, 72.2, 66.4, 60.7, 35.4, 28.8, 21.6, 21.2, 20.9, 19.2 ppm; MS (ESI)  $m/z$ : 382  $[(\text{M}+\text{H})^+]$ ; HRMS (ESI,  $m/z$ ) calcd for  $[\text{C}_{24}\text{H}_{31}\text{NO}_3\text{Na}]^+$ : 404.21962; Found: 404.21970.

### 1-Benzyl-5-isopropyl-4-methylenepyrrolidin-2-one (**5a**)

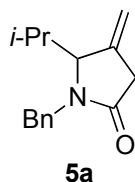

Following the typical procedure for cyclisation of *N*-hydroxyamino esters into lactams (see 3.4), from compound **4aa** compound **5a** was obtained in 99% yield. IR (neat, spectrometer B)  $\nu_{\text{max}}$ : 3086, 3063, 3031, 2962, 2931, 2874, 1689, 1663, 1495, 1431, 1401, 1386, 1360, 1318, 1284, 1227, 1170, 1081, 1029  $\text{cm}^{-1}$ ;  $^1\text{H}$  NMR (300 MHz,  $\text{CDCl}_3$ )  $\delta$ : 7.40-7.18 (m, 5H), 5.15 (d,  $J = 15.5$  Hz, 1H), 5.11 (brs, 1H), 4.93 (brs, 1H), 3.93 (d,  $J = 15.0$  Hz, 1H), 3.80 (brs, 1H), 3.18 (brd,  $J = 22.0$  Hz, 1H), 3.05 (brd,  $J = 21.0$  Hz, 1H), 2.20-2.00 (m, 1H), 0.94 (d,  $J = 7.0$  Hz, 3H), 0.77 (d,  $J = 7.0$  Hz, 3H) ppm;  $^{13}\text{C}$ -NMR (75 MHz,  $\text{CDCl}_3$ )  $\delta$ : 172.8, 138.9, 136.2, 128.6, 128.0, 127.5, 110.8, 66.7, 43.7, 38.5, 29.1, 18.2, 15.2 ppm; MS (ESI)  $m/z$ : 230  $[(\text{M}+\text{H})^+]$ , 252  $[(\text{M}+\text{Na})^+]$ ; HRMS (ESI,  $m/z$ ) calcd for  $[\text{C}_{15}\text{H}_{19}\text{NONa}]^+$ : 252.13589; Found:  $[(\text{M}+\text{Na})^+]$ : 252.13598.

### 1-Benzyl-5-methyl-4-methylenepyrrolidin-2-one (**5b**)

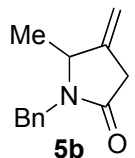

Following the typical procedure for cyclisation of *N*-hydroxyamino esters into lactams (see 3.4), from compound **4ba** compound **5b** was obtained in 75% yield. IR (neat, spectrometer B)  $\nu_{\text{max}}$ : 3088, 3060, 3028, 2974, 2923, 2870, 1689, 1666, 1600, 1492, 1423, 1397, 1359, 1274, 1233, 1176, 1084  $\text{cm}^{-1}$ ;  $^1\text{H}$

NMR (300 MHz, CDCl<sub>3</sub>)  $\delta$ : 7.36-7.21 (m, 5H), 5.12-5.02 (m, 2H), 5.02-4.97 (m, 1H), 4.08-3.95 (m, 2H), 3.31-3.10 (m, 2H), 1.26 (d,  $J$  = 6.5 Hz, 3H) ppm; <sup>13</sup>C-NMR (75 MHz, CDCl<sub>3</sub>)  $\delta$ : 172.3, 143.3, 136.3, 128.7, 128.0, 127.5, 108.6, 57.3, 43.8, 36.8, 19.4 ppm; MS (ESI)  $m/z$ : 202 [(M+H)<sup>+</sup>], 224 [(M+Na)<sup>+</sup>]; HRMS (ESI,  $m/z$ ) calcd for [C<sub>13</sub>H<sub>15</sub>NONa]<sup>+</sup>: 224.10459; Found: 224.10454.

### 1-Benzyl-5-ethyl-4-methylenepyrrolidin-2-one (5c)

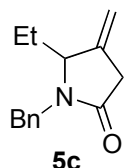

Following the typical procedure for cyclisation of *N*-hydroxyamino esters into lactams (see 3.4), from compound **4ca** compound **5c** was obtained in 91% yield. IR (neat, spectrometer B)  $\nu_{\text{max}}$ : 3088, 3063, 3028, 2965, 2930, 2876, 1689, 1663, 1496, 1439, 1426, 1401, 1359, 1283, 1226, 1173, 1068, 1024 cm<sup>-1</sup>; <sup>1</sup>H NMR (300 MHz, CDCl<sub>3</sub>)  $\delta$ : 7.37-7.21 (m, 5H), 5.15 (d,  $J$  = 15.0 Hz, 1H), 5.11 (brs, 1H), 4.97 (brs, 1H), 4.00 (brs, 1H), 3.84 (d,  $J$  = 15.0 Hz, 1H), 3.17 (s, 2H), 1.87-1.70 (m, 1H), 1.70-1.55 (m, 1H), 0.78 (t,  $J$  = 7.0 Hz, 3H) ppm; <sup>13</sup>C-NMR (75 MHz, CDCl<sub>3</sub>)  $\delta$ : 172.8, 140.9, 136.2, 128.7, 128.1, 127.6, 109.0, 61.9, 43.7, 37.5, 24.5, 6.7 ppm; MS (ESI)  $m/z$ : 216 [(M+H)<sup>+</sup>], 238 [(M+Na)<sup>+</sup>]; HRMS (ESI,  $m/z$ ) calcd for [C<sub>14</sub>H<sub>17</sub>NONa]<sup>+</sup>: 238.12024; Found: [(M+Na)<sup>+</sup>]: 238.11993.

### 1-Benzyl-5-(tert-butyl)-4-methylenepyrrolidin-2-one (5g)

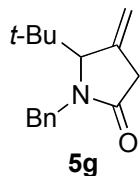

Following the typical procedure for cyclisation of *N*-hydroxyamino esters into lactams (see 3.4), from compound **4ga** compound **5g** was obtained in 88% yield. IR (neat, spectrometer B)  $\nu_{\text{max}}$ : 3082, 3060, 3028, 2961, 2904, 2866, 1695, 1663, 1480, 1426, 1397, 1359, 1312, 1268, 1223, 1201, 1160, 1084, 1030 cm<sup>-1</sup>; <sup>1</sup>H NMR (300 MHz, CDCl<sub>3</sub>)  $\delta$ : 7.42-7.22 (m, 3H), 7.17-7.09 (m, 3H), 5.41 (d,  $J$  = 15.0 Hz, 1H), 5.09 (brs, 1H), 4.87 (brs, 1H), 4.11 (d,  $J$  = 15.0 Hz, 1H), 3.55 (s, 1H), 3.26 (dt,  $J$  = 20.0, 3.0 Hz, 1H), 2.95 (d,  $J$  = 20.0 Hz, 1H), 0.97 (s, 9H) ppm; <sup>13</sup>C-NMR (75 MHz, CDCl<sub>3</sub>)  $\delta$ : 174.9, 140.9, 136.4, 128.7, 127.7, 127.4, 111.5, 71.3, 47.4, 38.8, 37.0, 27.1 ppm; MS (ESI)  $m/z$ : 244 [(M+H)<sup>+</sup>], 266 [(M+Na)<sup>+</sup>]; HRMS (ESI,  $m/z$ ) calcd for [C<sub>16</sub>H<sub>21</sub>NONa]<sup>+</sup>: 266.15154; Found: 266.15203.

## Ozonolysis of **5a**

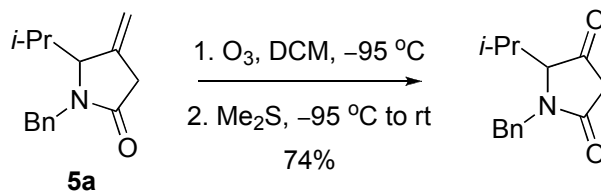

To a solution of **5a** (18 mg, 0.08 mmol) in DCM (4.0 mL) at  $-95\text{ }^{\circ}\text{C}$  (melting acetone bath), was bubbled ozone until a persistent blue color appeared (20 min). The mixture was purged with argon to remove the excess of ozone and then dimethyl sulfide (1 mL) was added. Then the solution was warmed naturally without removing the bath. 2 h later, 10 mL water was added, then it was extracted with EtOAc ( $3 \times 10\text{ mL}$ ). The combined organic layers were dried over  $\text{MgSO}_4$  and concentrated under reduced pressure. Purification by column chromatography on silica gel (EtOAc/Pentane 1/4  $\rightarrow$  EtOAc/Pentane 1/1) gave 1-benzyl-5-isopropylpyrrolidine-2,4-dione<sup>14</sup> as a yellow oil (13.4 mg, 74%). IR (neat, spectrometer B)  $\nu_{\text{max}}$ : 3091, 3063, 3031, 2958, 2933, 2873, 1768, 1689, 1492, 1416, 1388, 1366, 1318, 1264, 1239, 1071, 1027  $\text{cm}^{-1}$ ;  $^1\text{H}$  NMR (300 MHz,  $\text{CDCl}_3$ )  $\delta$ : 7.39-7.22 (m, 5H), 5.32 (d,  $J = 14.5\text{ Hz}$ , 1H), 4.00 (d,  $J = 14.5\text{ Hz}$ , 1H), 3.59 (d,  $J = 3.5\text{ Hz}$ , 1H), 3.02 (s, 2H), 2.28-2.10 (m, 1H), 1.06 (d,  $J = 7.0\text{ Hz}$ , 3H), 0.88 (d,  $J = 7.0\text{ Hz}$ , 3H) ppm;  $^{13}\text{C}$ -NMR (75 MHz,  $\text{CDCl}_3$ )  $\delta$ : 206.2, 169.2, 135.2, 128.9, 128.3, 128.0, 70.2, 43.7, 42.3, 28.5, 17.9, 16.0 ppm; MS (ESI)  $m/z$ : 232  $[(\text{M}+\text{H})^+]$ , 254  $[(\text{M}+\text{Na})^+]$ ; HRMS (ESI,  $m/z$ ) calcd for  $[\text{C}_{14}\text{H}_{17}\text{NO}_2\text{Na}]^+$ : 254.11515; Found:  $[(\text{M}+\text{Na})^+]$ : 254.11544.

## (S)-Benzyl 4-((R)-1,1-dimethylethylsulfinamido)-5-methyl-3-methylenehexanoate (**11a**)

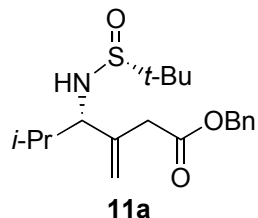

Following the typical procedure A (see 3.2), from *t*-BS-imine **2a**<sup>7</sup> and allenolate **3a**<sup>5</sup> compound **11a** was obtained in 64% yield as a colorless oil (unseparable mixture, d.r = 7:1), accompanied by the recovered **2a** (35%). Following the typical procedure B (see 3.3) compound **11a** was obtained in 85% yield as a yellow oil (unseparable mixture, d.r = 5:1).  $[\alpha]_{\text{D}}^{20} -20.8$  ( $c$  0.83, EtOH); IR (neat, spectrometer B)  $\nu_{\text{max}}$ : 3436, 3237, 2955, 2870, 1730, 1644, 1499, 1454, 1363, 1271, 1223, 1150, 1049  $\text{cm}^{-1}$ ;  $^1\text{H}$  NMR (300 MHz,  $\text{CDCl}_3$ )  $\delta$ : 7.32-7.23 (m, 5H), 5.14 (brs, 1H), 5.12 (brs, 1H), 5.05 (s, 2H),

<sup>14</sup> Spatz, J. H.; Welsch, S. J.; Duhaut, D. -E.; Jäger, N.; Boursier, T.; Fredrich, M.; Allmendinger, L.; Ross, G.; Kolb, J.; Burdack, C.; Umkehrer, M. *Tetrahedron Lett.* **2009**, 50, 1705-1707.

3.46 (dd,  $J = 8.0, 3.0$  Hz, 1H), 3.23 (d,  $J = 2.5$  Hz, 1H), 3.00 (d,  $J = 15.5$  Hz, 1H), 2.93 (d,  $J = 15.5$  Hz, 1H), 1.75-1.60 (m, 1H), 1.11 (s, 9H), 0.91 (d,  $J = 6.5$  Hz, 3H), 0.82 (d,  $J = 6.5$  Hz, 3H) ppm;  $^{13}\text{C}$ -NMR (75 MHz,  $\text{CDCl}_3$ )  $\delta$ : 171.1, 140.1, 135.7, 128.5, 128.3, 128.2, 118.2, .66.8, 66.6, 55.3, 36.9, 30.3, 22.5, 19.8, 18.9 ppm; MS (ESI)  $m/z$ : 352  $[(\text{M}+\text{H})^+]$ , 374  $[(\text{M}+\text{Na})^+]$ ; HRMS (ESI,  $m/z$ ) calcd for  $[\text{C}_{19}\text{H}_{29}\text{NO}_3\text{SNa}]^+$ : 374.17604; Found: 374.17660.

**(S)-Benzyl 4-((R)-1,1-dimethylethylsulfinamido)-6-methyl-3-methyleneheptanoate (11b)**

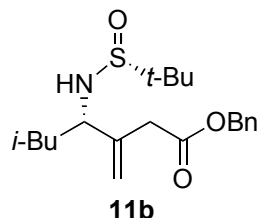

Following the typical procedure A (see 3.2), from *t*-BS-imine **2b**<sup>15</sup> and allenolate **3a**<sup>5</sup> compound **11b** was obtained in 55% yield as a colorless oil (dr = 10:1), accompanied by the recovered **2b** (35%). Following the typical procedure B (see 3.3) compound **11b** was obtained in 87% yield as a colorless oil (dr = 5:1).  $[\alpha]^{20}_{\text{D}} -41.8$  ( $c$  1.46, EtOH); IR (neat, spectrometer B)  $\nu_{\text{max}}$ : 3436, 3218, 3091, 3066, 3034, 2958, 2930, 2870, 1733, 1647, 1496, 1454, 1366, 1264, 1211, 1147, 1052, 1005  $\text{cm}^{-1}$ ;  $^1\text{H}$  NMR (300 MHz,  $\text{CDCl}_3$ )  $\delta$ :  $\delta$ 7.46-7.30 (m, 5H), 5.25 (s, 1H), 5.16 (s, 1H), 5.13 (s, 2H), 4.08-3.90 (m, 1H), 3.19-3.03 (m, 2H), 1.70-1.32 (m, 3H), 1.18 (s, 9H), 0.90 (d,  $J = 7.0$  Hz, 3H), 0.88 (d,  $J = 7.0$  Hz, 3H) ppm;  $^{13}\text{C}$ -NMR (75 MHz,  $\text{CDCl}_3$ )  $\delta$ : 171.3, 141.1, 135.7, 128.5, 128.3, 117.5, 66.6, 58.7, 55.4, 43.5, 36.6, 24.6, 22.7, 22.5, 22.2 ppm; MS (ESI)  $m/z$ : 366  $[(\text{M}+\text{H})^+]$ , 388  $[(\text{M}+\text{Na})^+]$ ; HRMS (ESI,  $m/z$ ) calcd for  $[\text{C}_{20}\text{H}_{31}\text{NO}_3\text{SNa}]^+$ : 388.19169; Found: 388.19232.

**Benzyl 3-((S)-cyclohexyl((R)-1,1-dimethylethylsulfinamido)methyl)but-3-enoate (11c)**

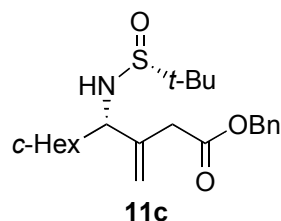

Following the the typical procedure B (see 3.3), from *t*-BS-imine **2c**<sup>16</sup> and allenolate **3a**<sup>5</sup> compound **11c** was obtained in 85% yield as a yellow oil (dr = 4.5:1).  $[\alpha]^{20}_{\text{D}} -26.4$  ( $c$  0.68, EtOH); IR (KBr,

<sup>15</sup> Frantz, M. -C.; Pierce, J. G.; Pierce, J. M.; Li, K.; Wan, Q.; Johnson, M.; Wipf, P. *Org. Lett.*, **2011**, *13*, 2318–2321.

<sup>16</sup> Chemla, F.; Ferreira, F. *J. Org. Chem.*, **2004**, *69*, 8244–8250.



spectrometer A)  $\nu_{\max}$ : 3330, 2919, 2849, 1731, 1644, 1600, 1451, 1384, 1262, 1151, 1057  $\text{cm}^{-1}$ ;  $^1\text{H}$  NMR (400 MHz,  $\text{CDCl}_3$ )  $\delta$ : 7.42-7.29 (m, 5H), 5.18 (s, 2H), 5.12 (s, 1H), 3.58 (dd,  $J = 8.5, 3.0$  Hz, 1H), 3.35 (d,  $J = 3.0$  Hz, 1H), 3.06 (d,  $J = 15.0$ , 1H), 2.99 (d,  $J = 15.0$ , 1H), 1.90-1.51 (m, 5H), 1.44-1.31 (m, 1H), 1.22-1.08 (m, 2H), 1.17 (s, 9H), 1.04-1.86 (m, 3H) ppm;  $^{13}\text{C}$ -NMR (100 MHz,  $\text{CDCl}_3$ )  $\delta$ : 171.1, 139.8, 135.6, 128.4, 128.2, 128.2, 118.1, 66.5, 65.9, 55.3, 39.5, 36.2, 30.1, 29.4, 26.1, 25.8, 25.8, 22.4 ppm; MS (ESI)  $m/z$  414 ( $\text{M} + \text{Na}^+$ , 100%); HRMS calcd for  $[\text{C}_{22}\text{H}_{33}\text{NO}_3\text{S} + \text{Na}]^+$ : 414.20734; found: 414.20724.

**(S)-Benzyl 4-((R)-1,1-dimethylethylsulfinamido)-3-methyleneheptanoate (11d)**

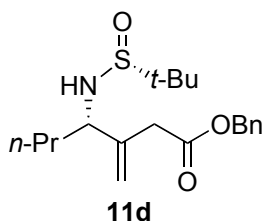

Following the the typical procedure B (see 3.3), from *t*-BS-imine **2d**<sup>17</sup> and allenolate **3a**<sup>5</sup> compound **11d** was obtained in 78% yield as a yellow oil (dr = 5.5:1).  $[\alpha]_{\text{D}}^{20} -43.8$  ( $c$  0.88, EtOH); IR (KBr, spectrometer A)  $\nu_{\max}$ : 3271, 2954, 2930, 2869, 1735, 1452, 1382, 1363, 1263, 1211, 1150, 1058  $\text{cm}^{-1}$ ;  $^1\text{H}$  NMR (400 MHz,  $\text{CDCl}_3$ )  $\delta$ : 7.40-7.28 (m, 5H), 5.22 (s, 1H), 5.14 (s, 1H), 5.11 (s, 2H), 3.91-3.84 (m, 1H), 3.14 (d,  $J = 3.5$  Hz, 1H), 3.09 (d,  $J = 15.0$  Hz, 1H), 3.03 (d,  $J = 15.0$  Hz, 1H), 1.65-1.46 (m, 2H), 1.35-1.23 (m, 2H), 1.17 (s, 9H), 0.88 (t,  $J = 7.0$  Hz, 3H) ppm;  $^{13}\text{C}$ -NMR (100 MHz,  $\text{CDCl}_3$ )  $\delta$ : 171.2, 140.9, 135.7, 128.5, 128.3, 117.5, 66.6, 60.4, 55.4, 36.7, 36.5, 22.5, 19.1, 13.7 ppm; MS (ESI)  $m/z$  374 ( $\text{M} + \text{Na}^+$ , 100%); HRMS calcd for  $[\text{C}_{19}\text{H}_{29}\text{NO}_3\text{S} + \text{Na}]^+$ : 374.17604; found: 374.17558.

**(S)-Benzyl 4-((R)-1,1-dimethylethylsulfinamido)-3-methylene-5-phenylpentanoate (11e)**

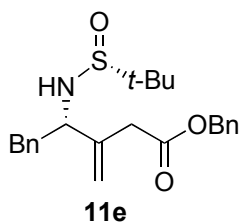

Following the the typical procedure B (see 3.3), from *t*-BS-imine **2e**<sup>18</sup> and allenolate **3a**<sup>5</sup> compound **11e** was obtained in 61% yield as a yellow oil (dr = 8:1).  $[\alpha]_{\text{D}}^{20} -53.1$  ( $c$  1.20, EtOH); IR (KBr, spectrometer A)  $\nu_{\max}$ : 3284, 3211, 3061, 3028, 2957, 1732, 1497, 1455, 1366, 1260, 1147, 1068  $\text{cm}^{-1}$ ;

<sup>17</sup> Ruan, S. -T.; Luo, J. -M; Du, Y.; Huang, P. -Q. *Org. Lett.* **2011**, *13*, 4938-4941.

$^1\text{H}$  NMR (400 MHz,  $\text{CDCl}_3$ )  $\delta$ : 7.40-7.12 (m, 10H), 5.24 (s, 1H), 5.18 (s, 1H), 5.13 (s, 2H), 4.25-4.16 (m, 1H), 3.40-3.33 (m, 1H), 3.13 (d,  $J = 4$  Hz, 2H), 2.98 (dd,  $J = 14.0, 6.0$  Hz, 1H), 2.84 (dd,  $J = 14.0, 8.0$  Hz, 1H), 1.11 (s, 9H) ppm;  $^{13}\text{C}$ -NMR (100 MHz,  $\text{CDCl}_3$ )  $\delta$ : 171.1, 140.3, 136.6, 135.7, 129.3, 128.7, 128.5, 128.3, 126.9, 118.4, 66.7, 60.2, 55.4, 41.1, 37.3, 22.5 ppm; MS (ESI)  $m/z$  400 ( $\text{M} + \text{H}^+$ , 100%); HRMS calcd for  $[\text{C}_{23}\text{H}_{29}\text{NO}_3\text{S} + \text{Na}]^+$ : 422.17604; found: 422.17520.

### Preparation of 5-isopropyl-4-methylenepyrrolidin-2-one (**12a**)

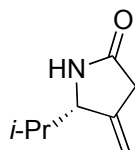

**12a**

To a solution of compound **11a** (95 mg, 0.27 mmol, dr = 5:1) in methanol (5 mL) was added 0.4 mL of 12 N HCl aqueous solution at room temperature. The mixture was then stirred at rt for 25 h. Then the MeOH was removed under reduced pressure, and the  $\text{NaHCO}_3$  (15 mL) was added carefully to the resultant residue. It was extracted with DCM ( $3 \times 8$  mL). The combined organic layers were dried over  $\text{MgSO}_4$  and concentrated under reduced pressure. Purification by column chromatography on silica gel (EtOAc/Hexane 1/4  $\rightarrow$  1/1) gave a yellow solid **12a** (29 mg, 77%). M.p. 79-80  $^\circ\text{C}$  (EtOAc/Hexane);  $[\alpha]_D^{20}$  -61.9 ( $c$  1.00,  $\text{CHCl}_3$ ); IR (neat, spectrometer B)  $\nu_{\text{max}}$ : 3189, 3091, 2958, 2927, 2892, 2870, 1695, 1660, 1454, 1375, 1340, 1315, 1287, 1230, 1150, 1027  $\text{cm}^{-1}$ ;  $^1\text{H}$  NMR (300 MHz,  $\text{CDCl}_3$ )  $\delta$ : 6.63 (brs, 1H), 5.30-5.10 (m, 1H), 5.10-5.00 (m, 1H), 4.05 (brs, 1H), 3.20-2.93 (m, 2H), 2.05-1.75 (m, 1H), 0.98 (d,  $J = 7.0$  Hz, 3H), 0.88 (d,  $J = 7.0$  Hz, 3H) ppm;  $^{13}\text{C}$ -NMR (75 MHz,  $\text{CDCl}_3$ )  $\delta$ : 176.1, 142.7, 109.6, 64.8, 37.2, 33.6, 18.9, 15.9 ppm. MS (ESI)  $m/z$ : 162 ( $\text{M} + \text{Na}^+$ , 100); HRMS (ESI,  $m/z$ ) calcd for  $[\text{C}_8\text{H}_{13}\text{NONa}]^+$ : 162.08894; Found: 162.08884.

### Preparation of 5-isopropylpyrrolidine-2,4-dione (**13a**)

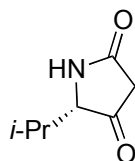

**13a**

To a solution of **12a** (48 mg, 0.36 mmol) in DCM (7 mL) at  $-95$   $^\circ\text{C}$  (melting acetone bath), was bubbled ozone until a persistent blue color appeared (20 min). The mixture was purged with argon to remove the excess of ozone and then dimethyl sulfide (0.5 mL) was added. Then the solution was

warmed to rt over 1 h. The solution was concentrated under reduced pressure, then the residue was purified by column chromatography on silica gel (EtOAc/Pentane 1/4 → 2/1) to give a white solid **13a** (29.2 mg, 60%), which was recrystallized to give enantionpure **13a**. M.p. 137-138 °C (EtOAc/Hexane);  $[\alpha]_D^{20}$  -42.3 (c 0.32, EtOH) {lit.<sup>18</sup> -46.4 (c 1.00, EtOH)}; IR (KBr, spectrometer A)  $\nu_{\max}$ : 3174, 3098, 2967, 2927, 2875, 1769, 1705, 1656, 1385, 1357, 1333, 1311, 1278, 1244, 1125, 1086, 1037  $\text{cm}^{-1}$ ;  $^1\text{H}$  NMR (400 MHz,  $\text{CDCl}_3$ )  $\delta$ : 7.24 (brs, 1H), 3.88 (d,  $J$  = 4.0 Hz, 1H), 3.01-2.94 (m, 2H), 2.24-2.11 (m, 1H), 1.04 (d,  $J$  = 7.0 Hz, 3H), 0.93 (d,  $J$  = 7.0 Hz, 3H) ppm;  $^{13}\text{C}$ -NMR (100 MHz,  $\text{CDCl}_3$ )  $\delta$ : 207.3, 171.8, 69.5, 41.4, 30.9, 18.8, 16.6 ppm; MS (ESI)  $m/z$  164 ( $\text{M} + \text{Na}^+$ , 100%);

5- Copies of  $^1\text{H}$  and  $^{13}\text{C}$  NMR spectra for new compounds

---

<sup>18</sup> Hosseini, M.; Kringelum, H.; Murray, A.; Tønder, J. E. *Org. Lett.* **2006**, 8, 2103–2106.

Compound **4aa**:

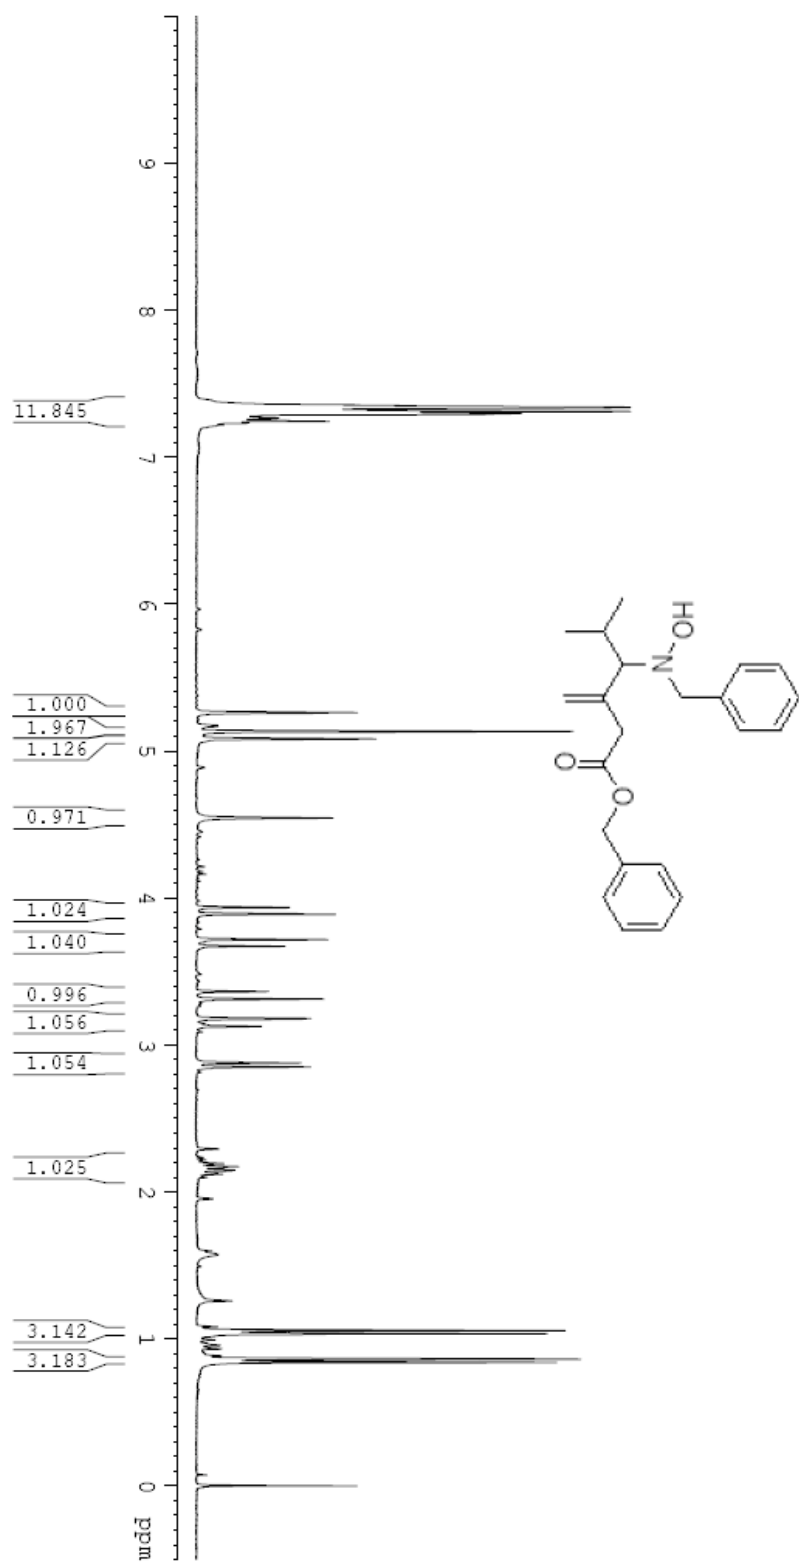

cpx110409exp1  
cpxa142  
cdcl3, 300.12

Compound **4aa**:

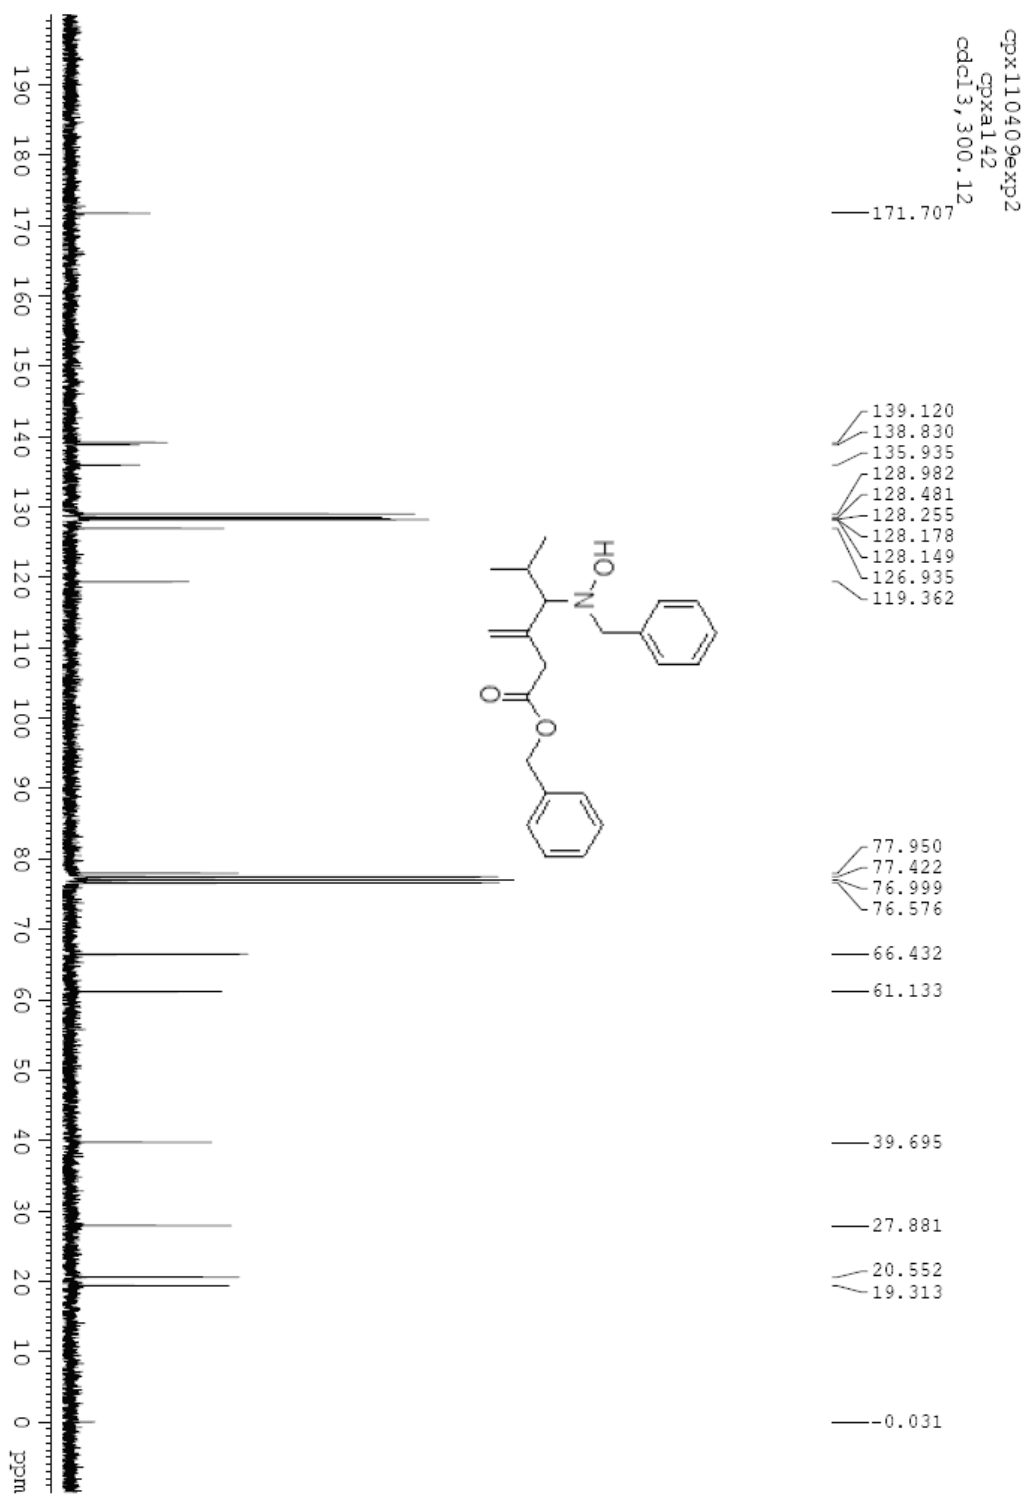

Compound **4ba**:

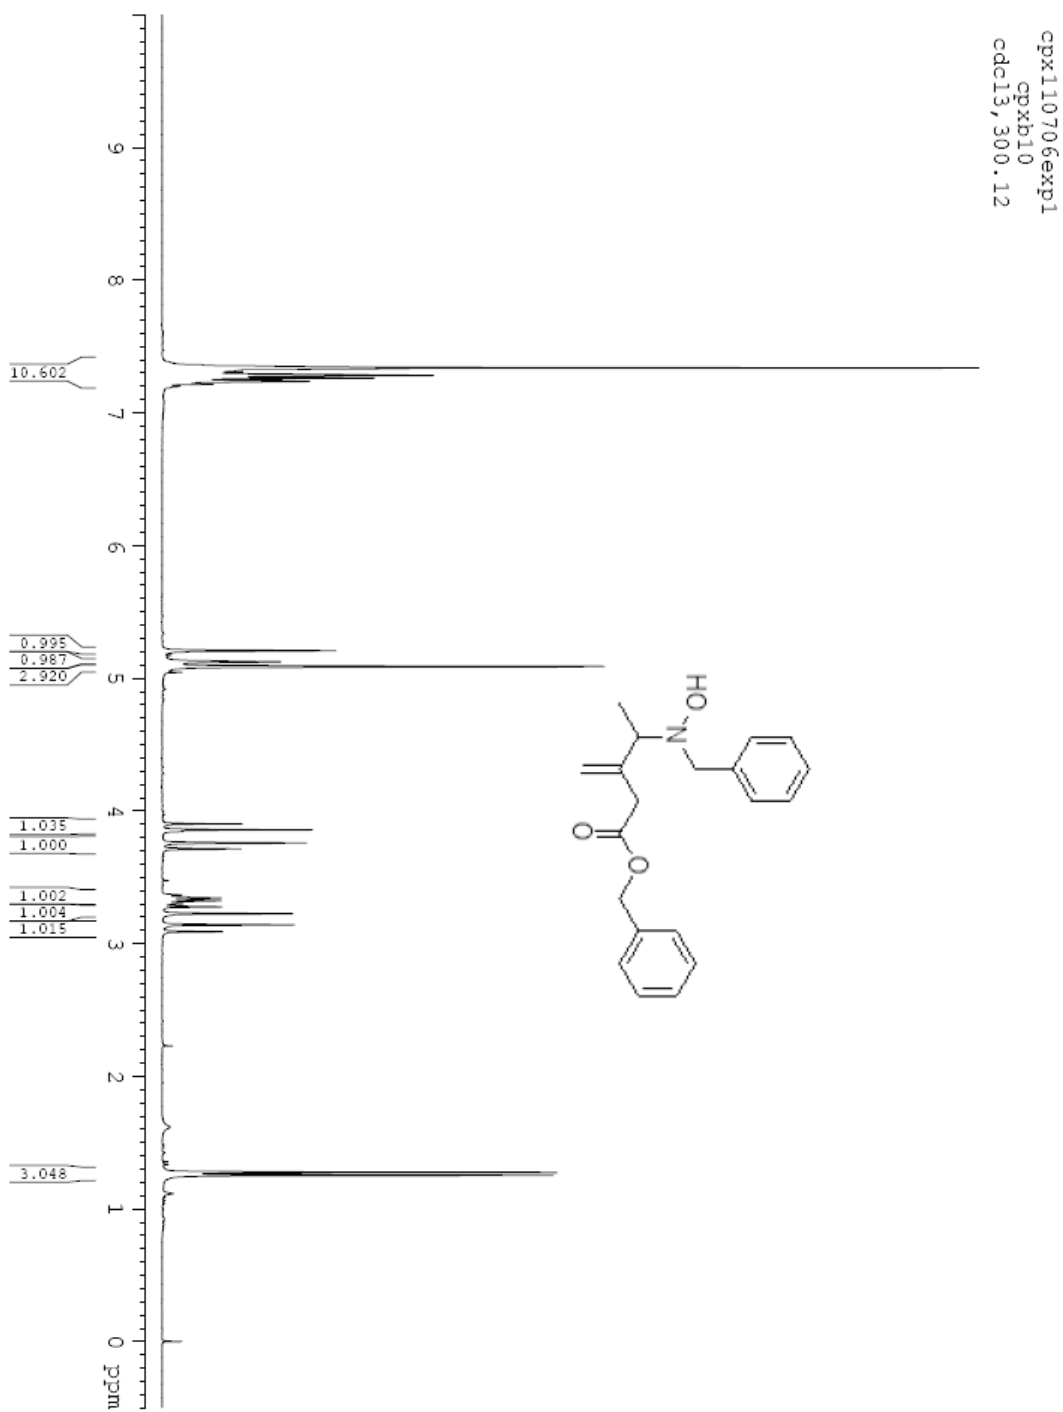

Compound **4ba**:

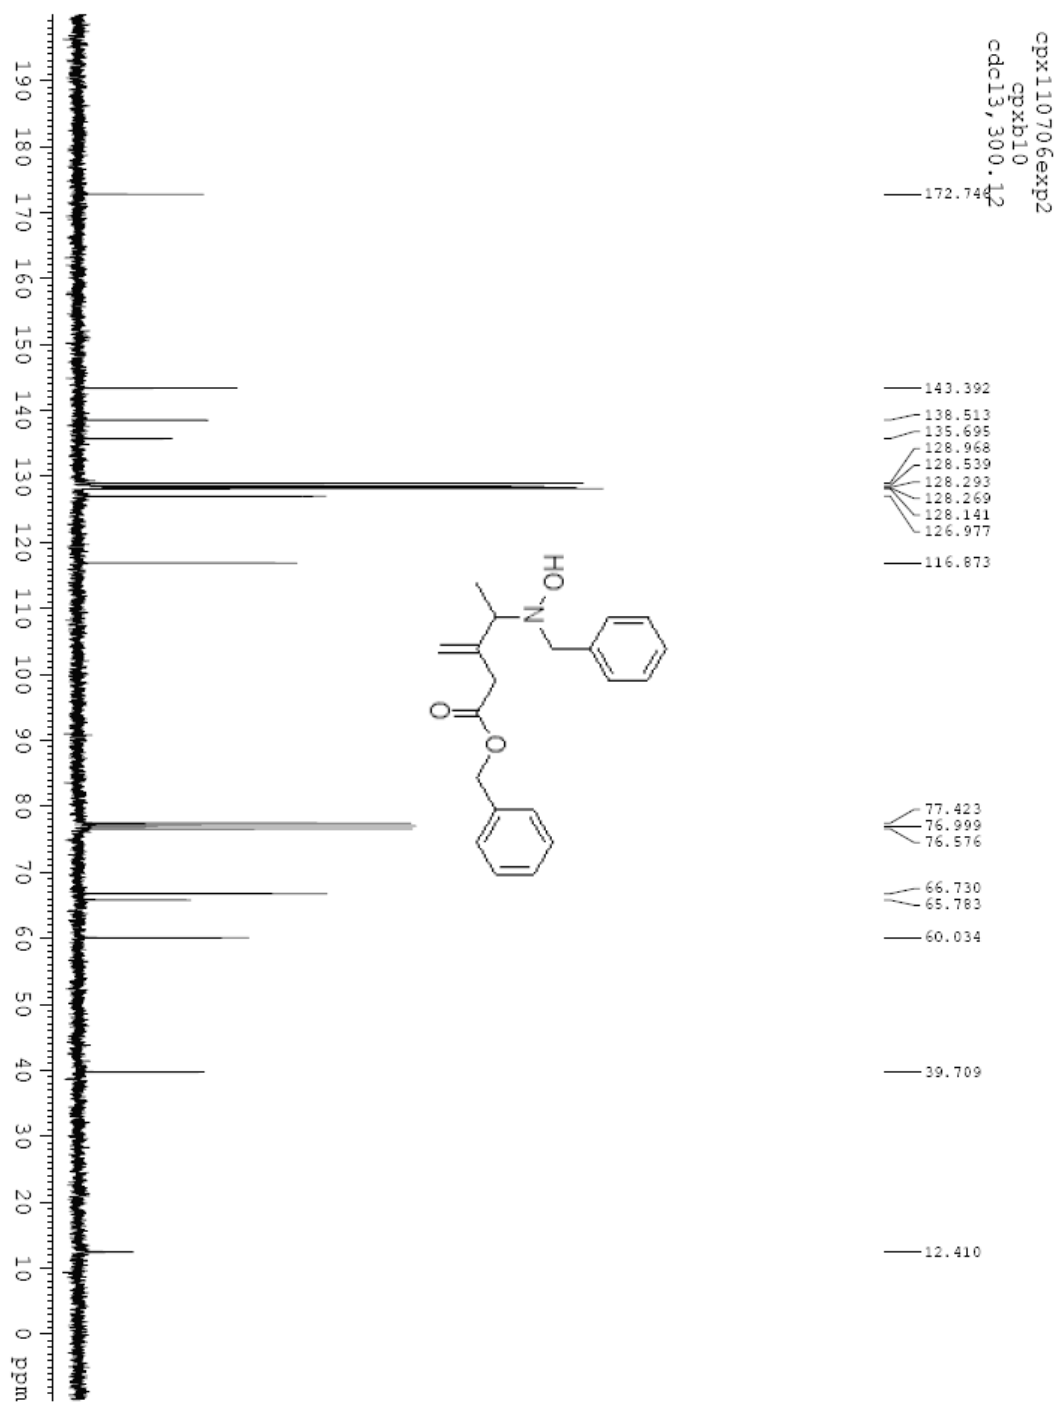

Compound **4ca**:

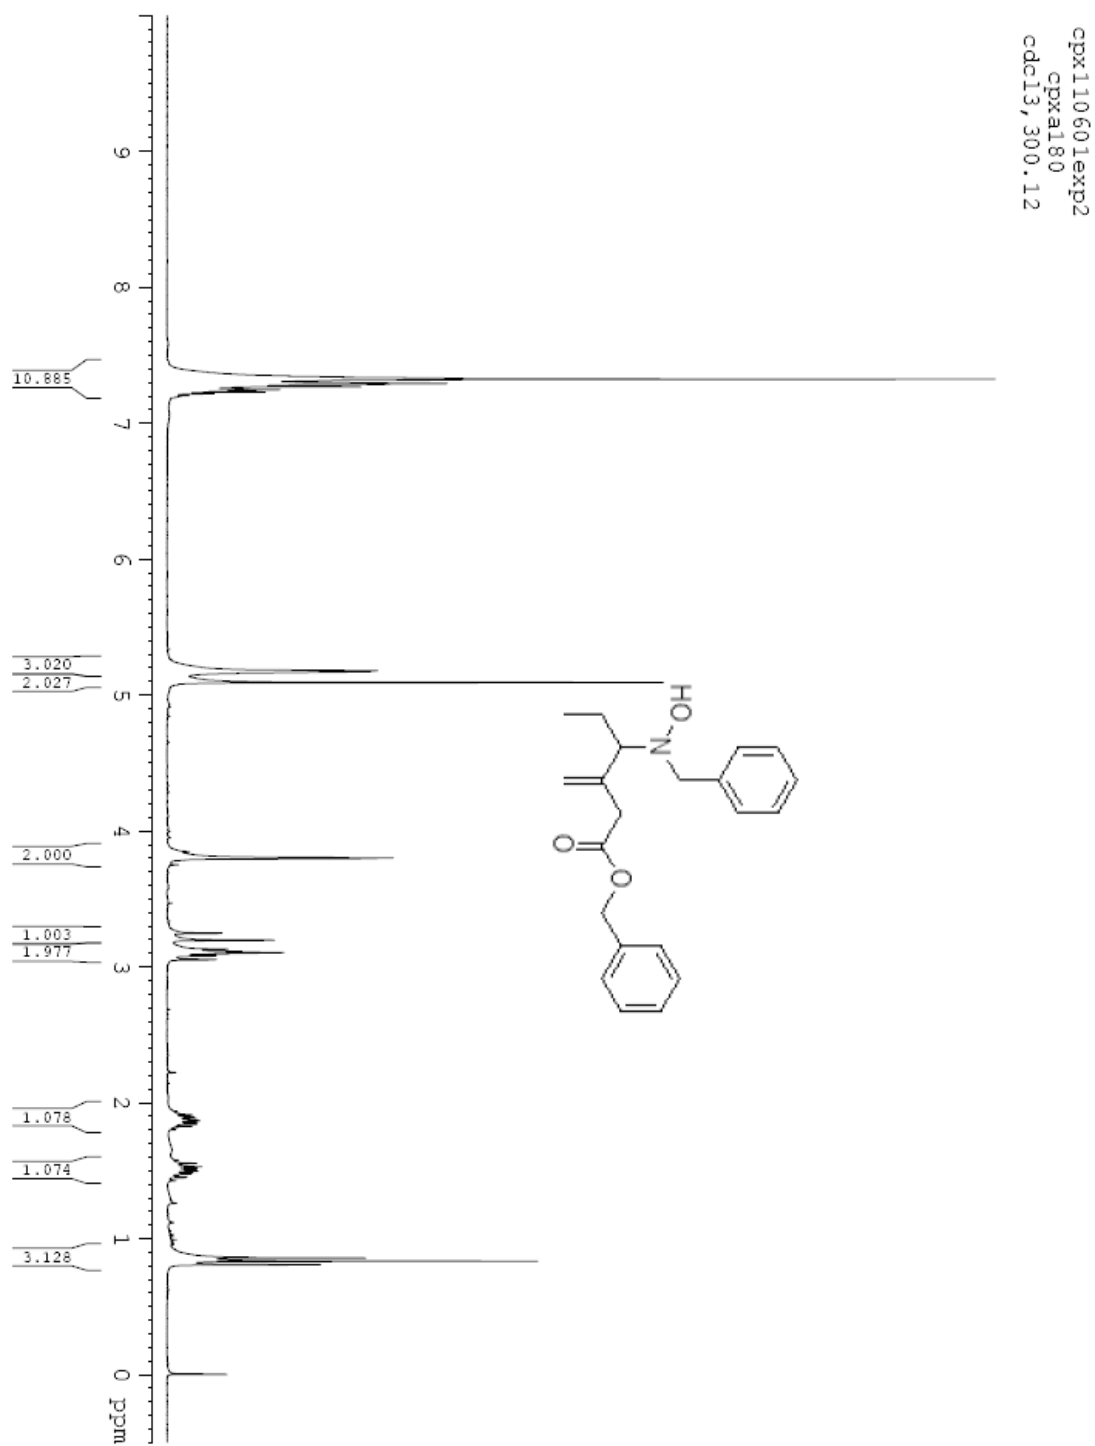



Compound **4ca**:

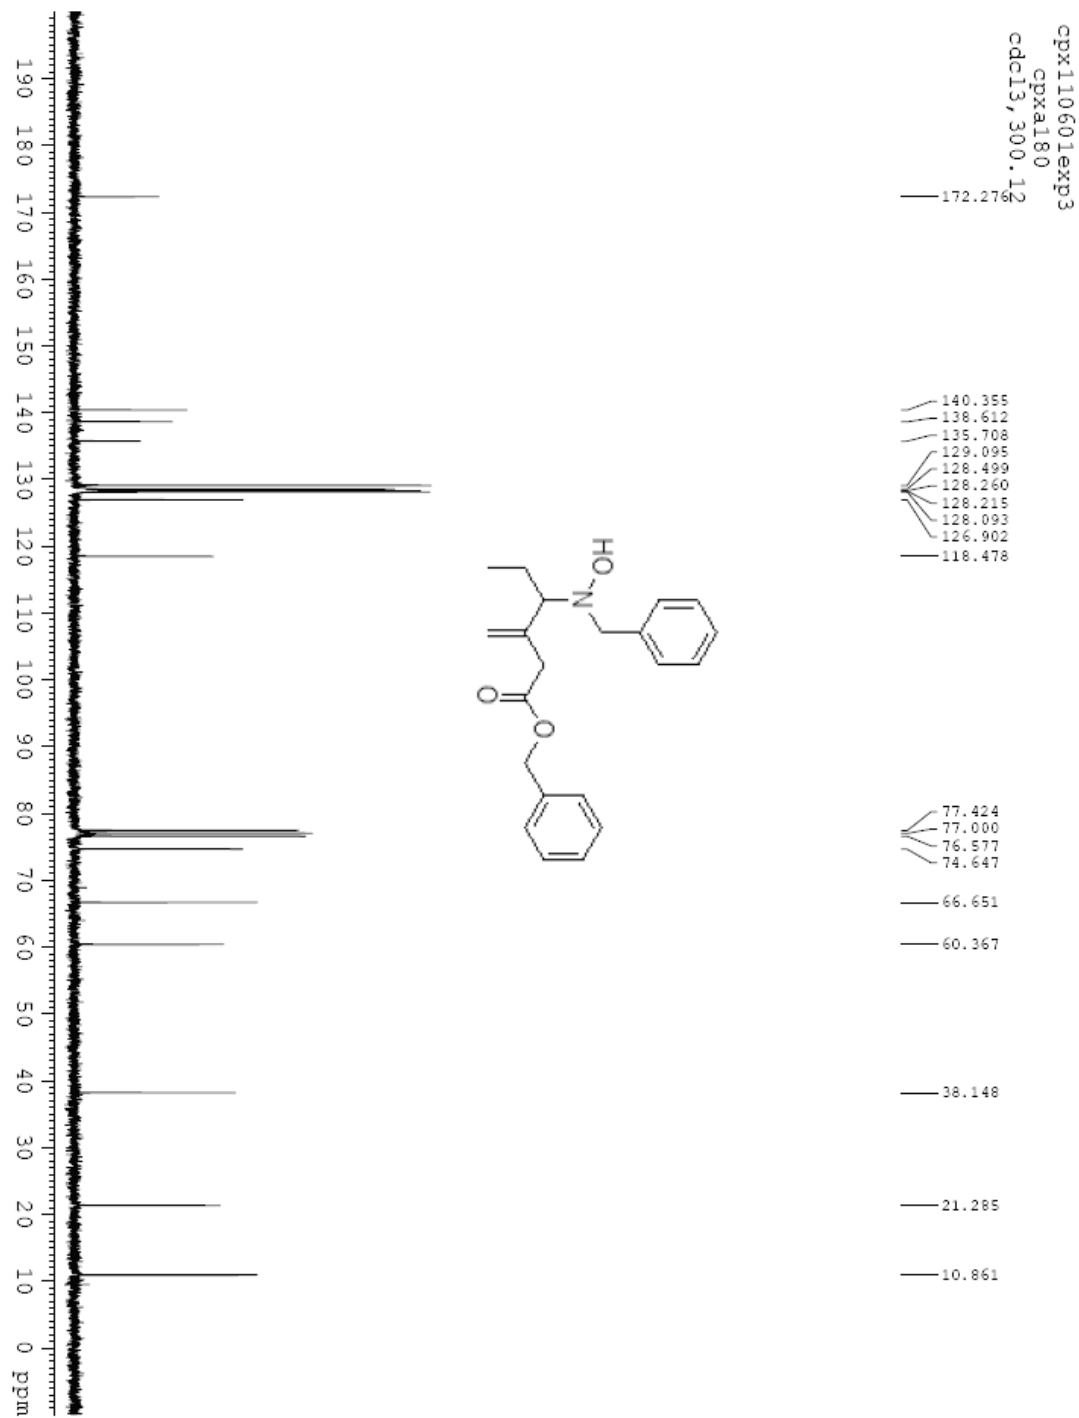

Compound **4da**:

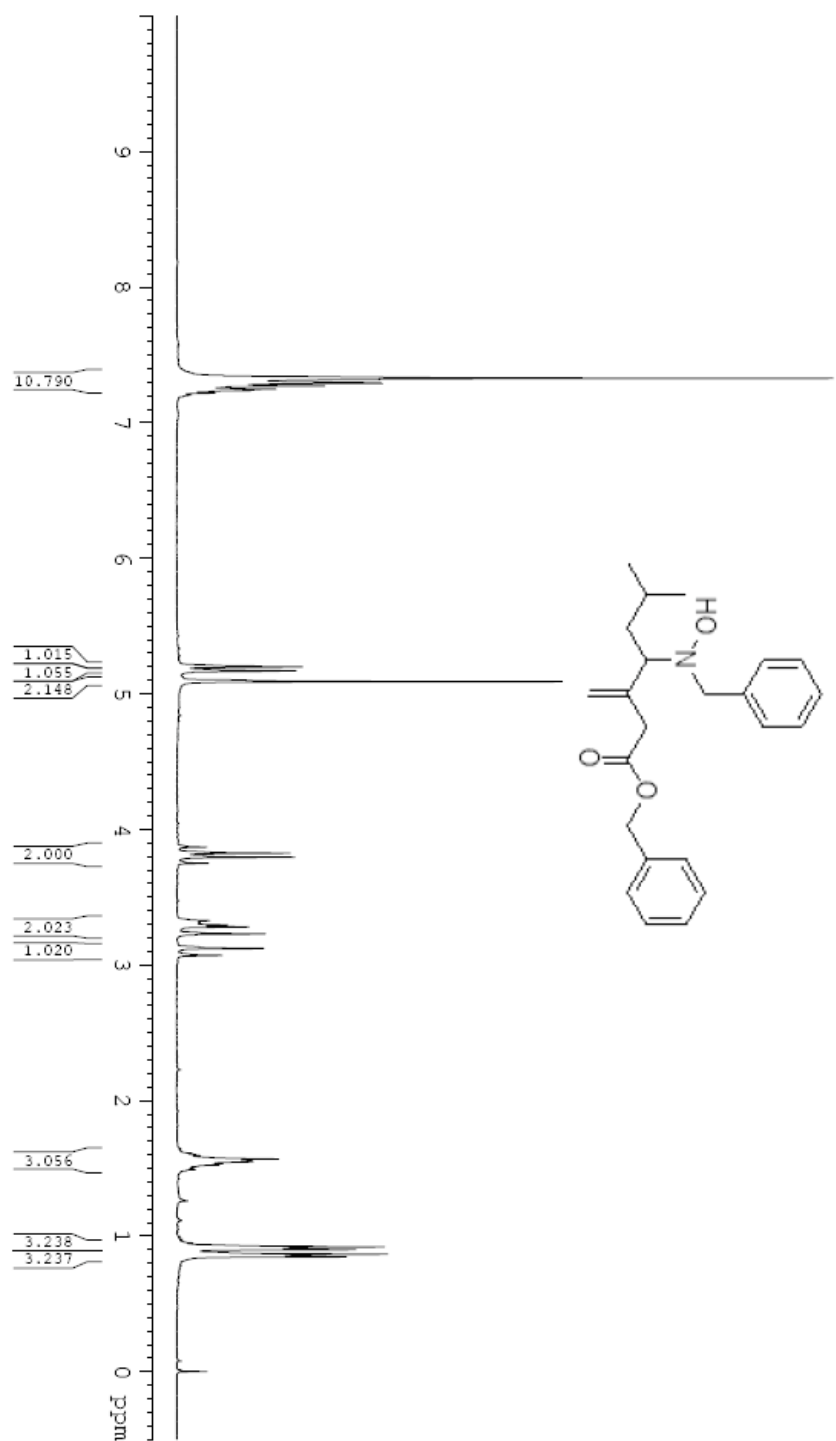

cpx110623exp1  
cpxa196  
cdcl3, 300.12

Compound **4da**:

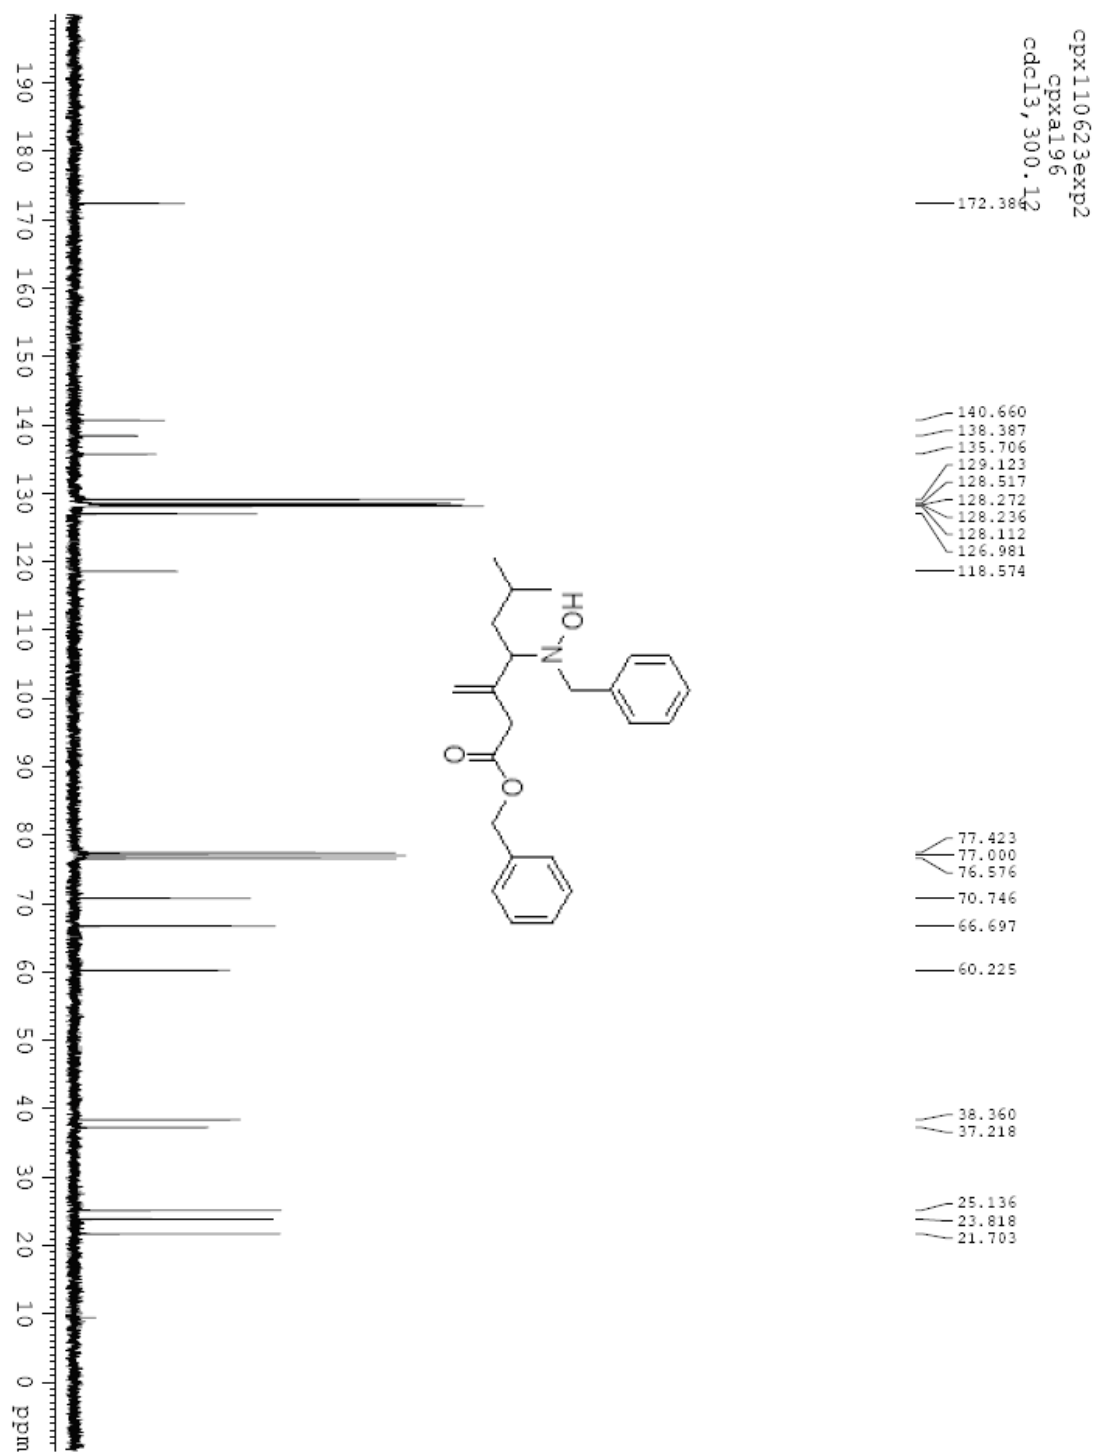

Compound **4ea**:

cpx110818exp1  
cpxb39  
cdcl3, 300.13

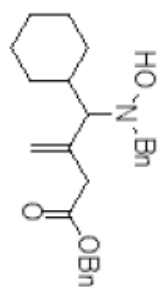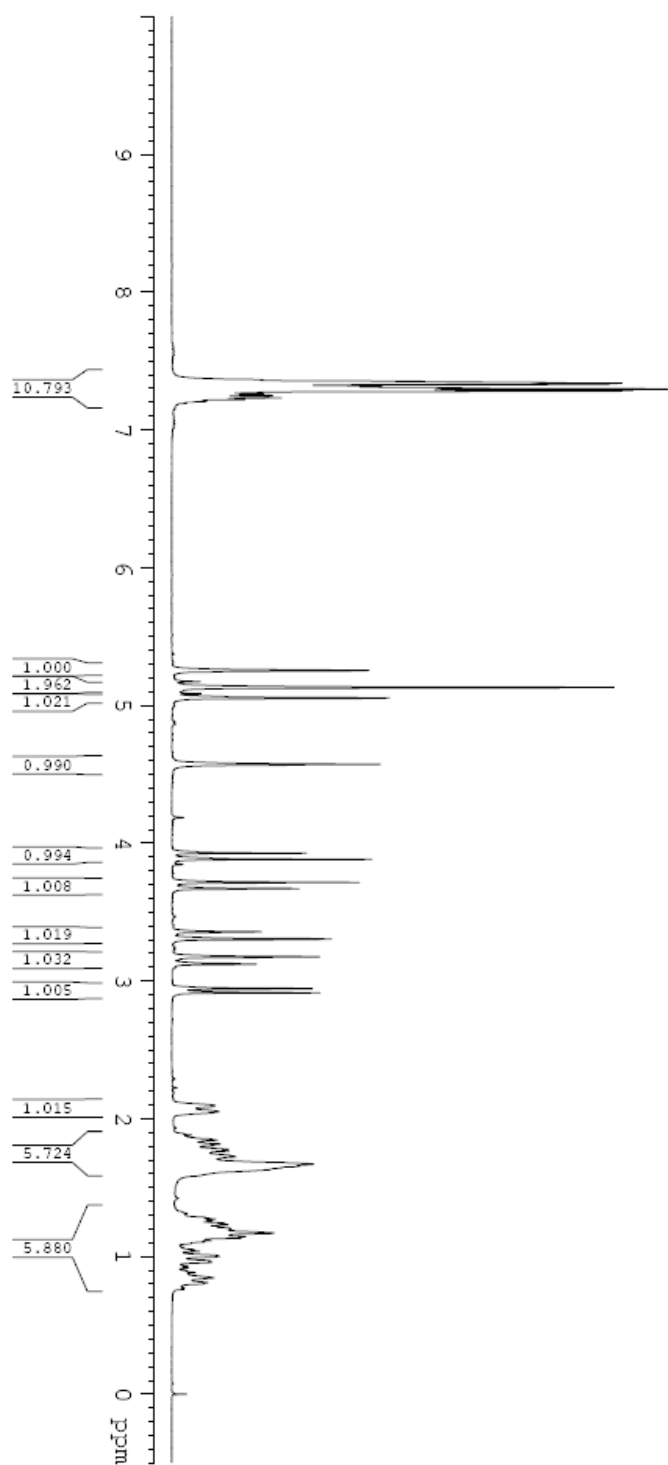

Compound **4ea**:

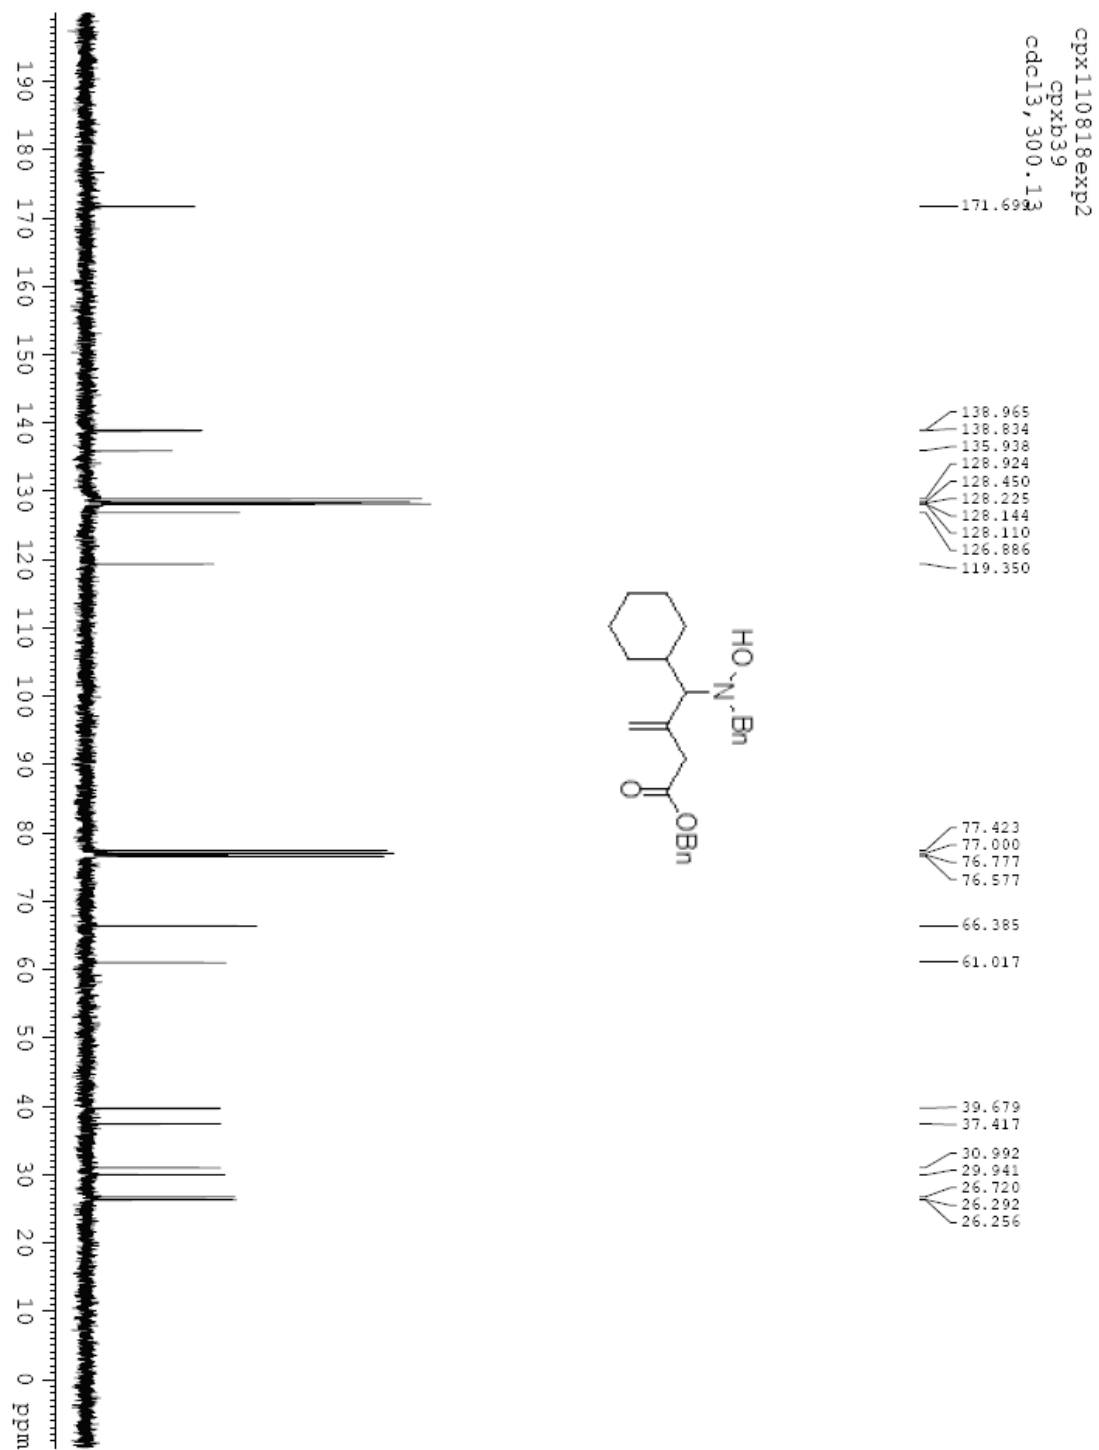

Compound **4fa**:

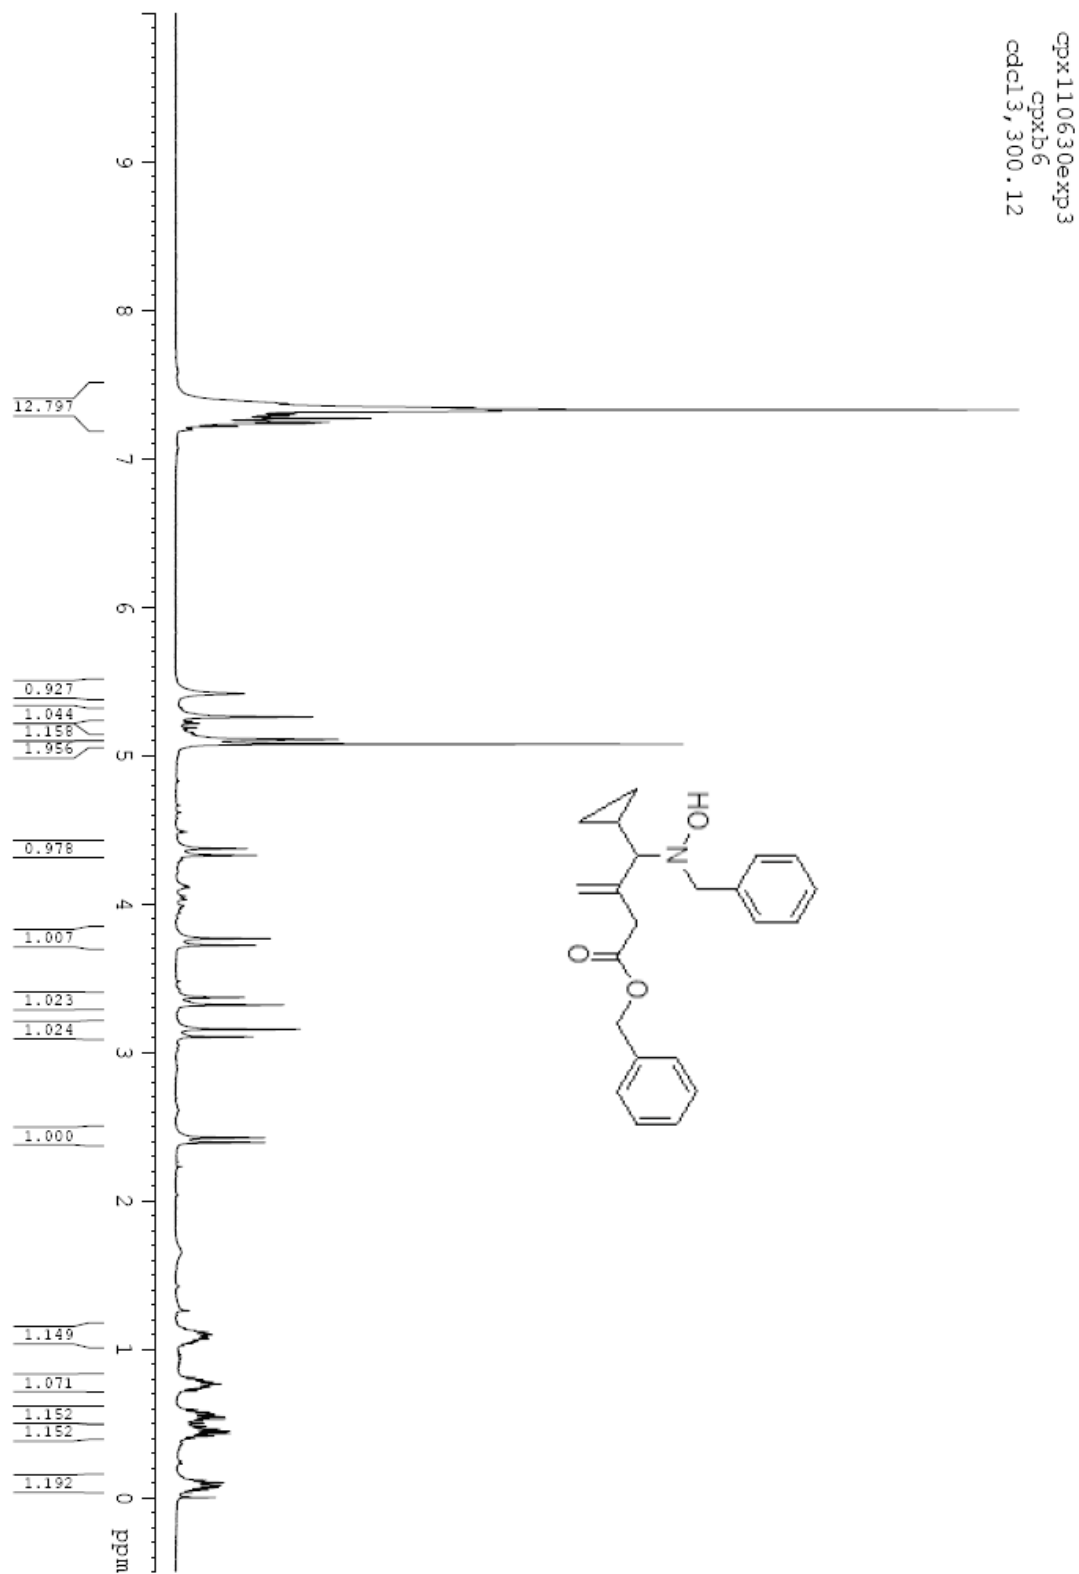

Compound **4fa**:

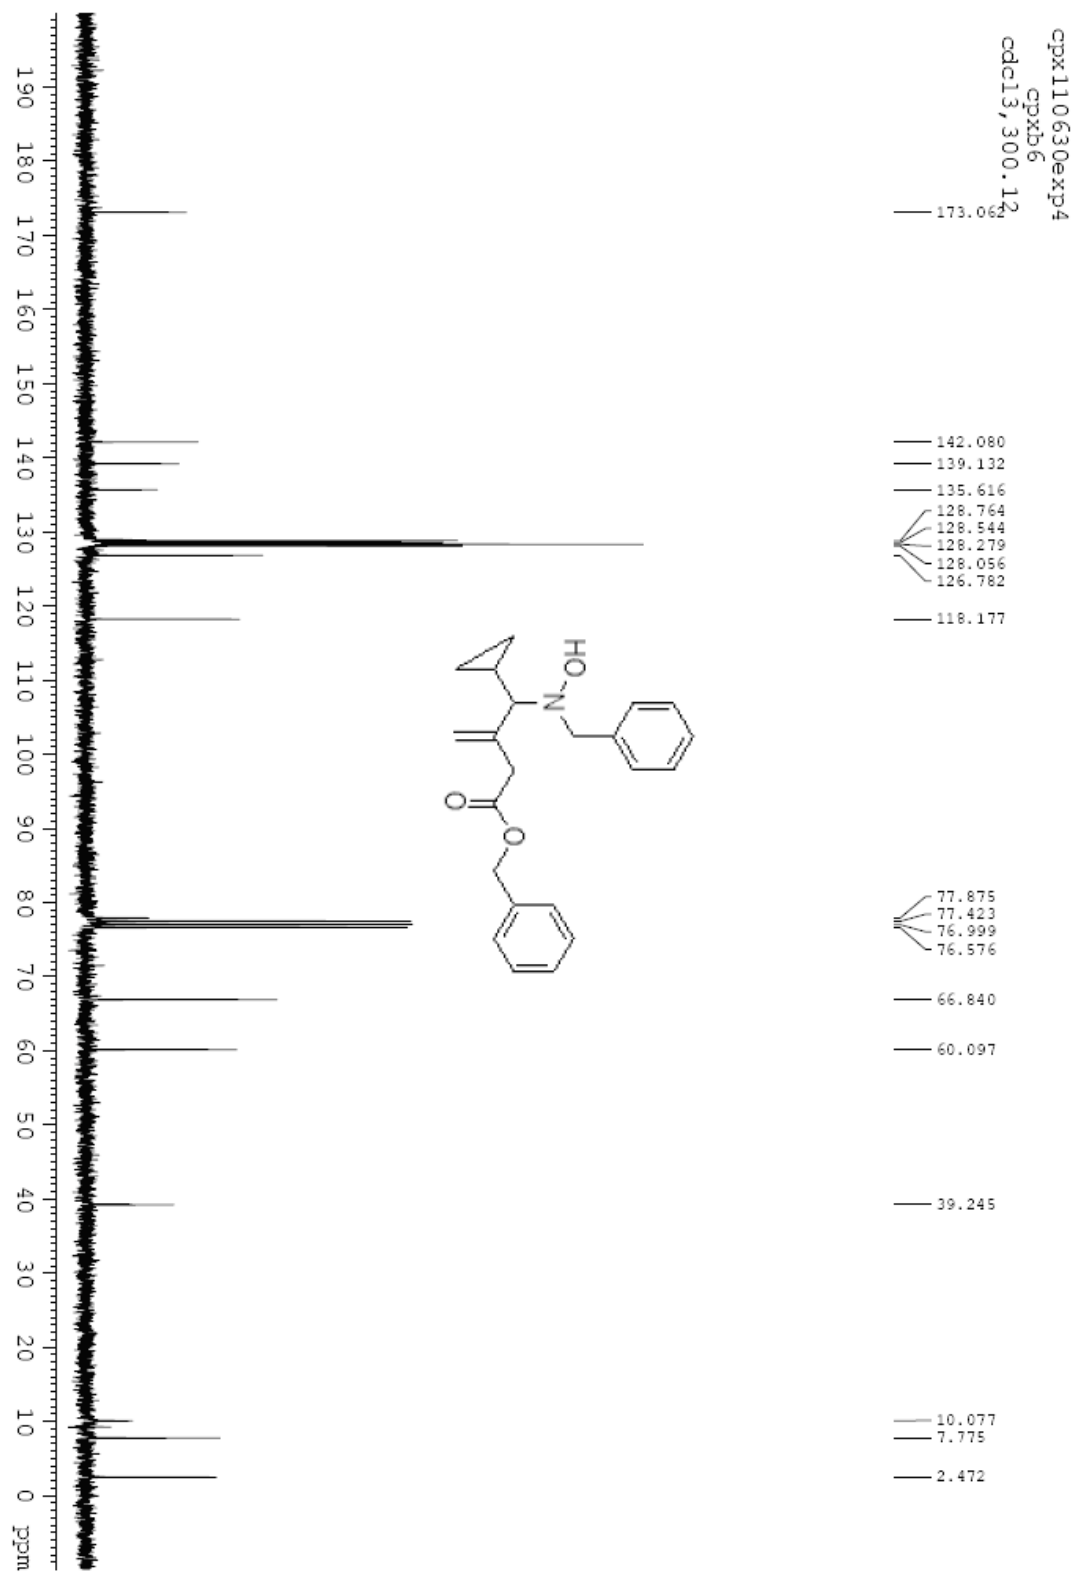

Compound **4ga**:

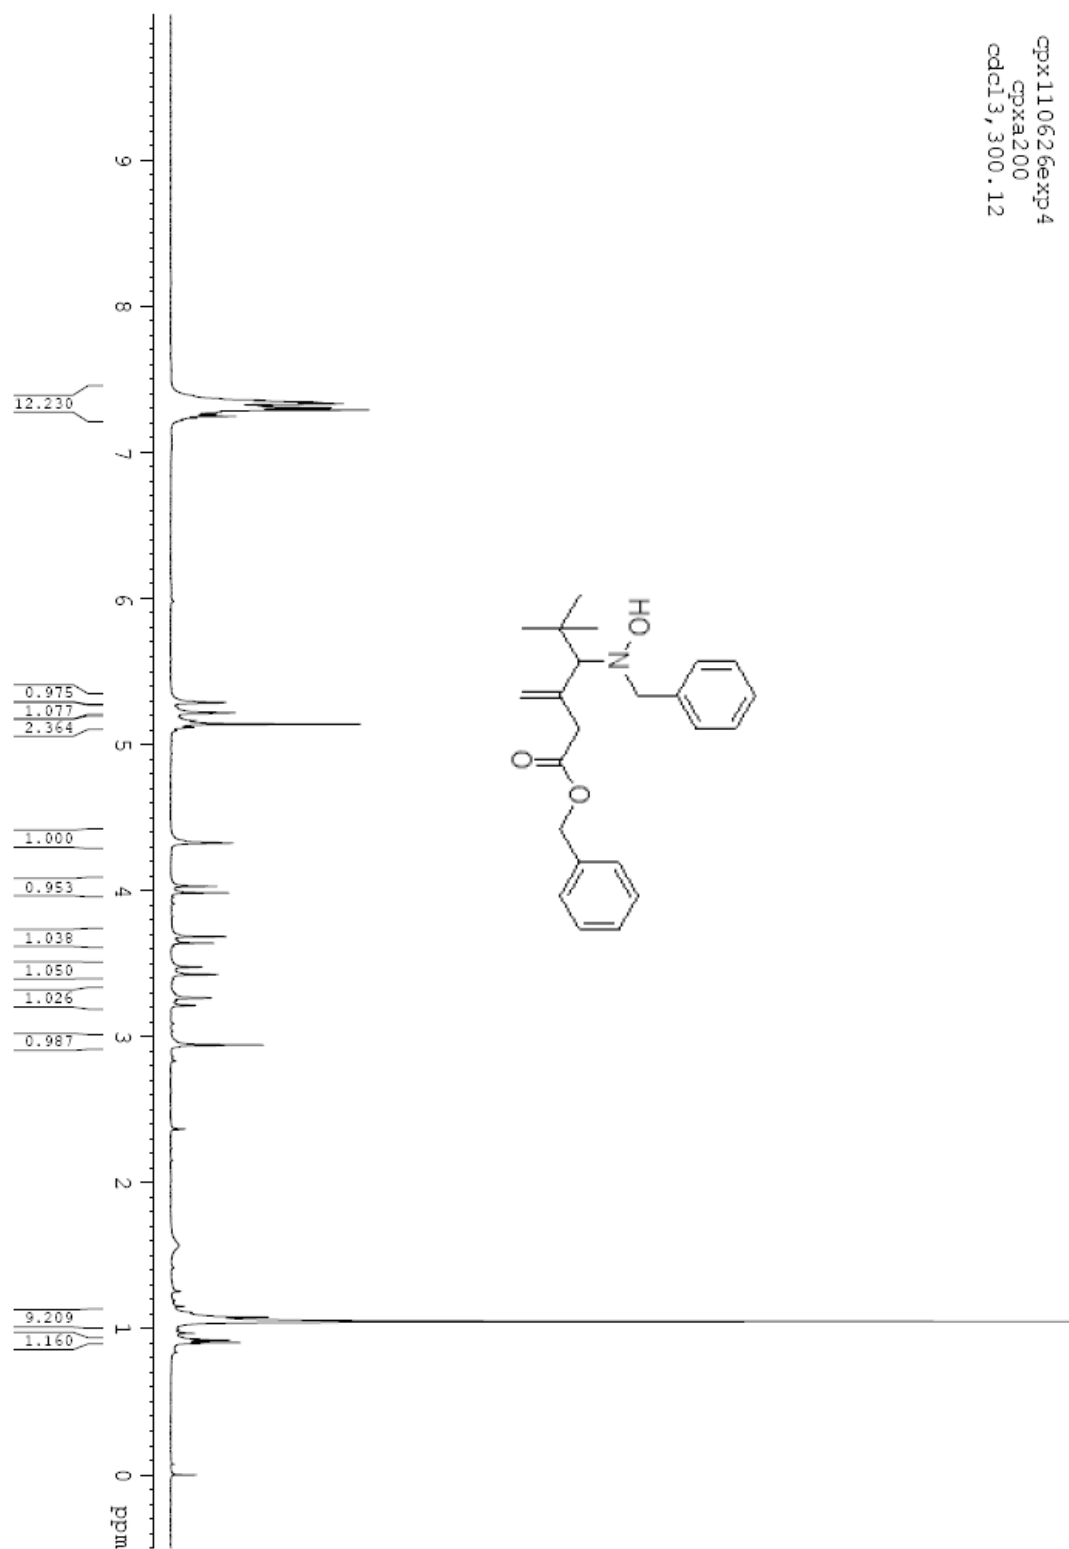



Compound **4ga**:

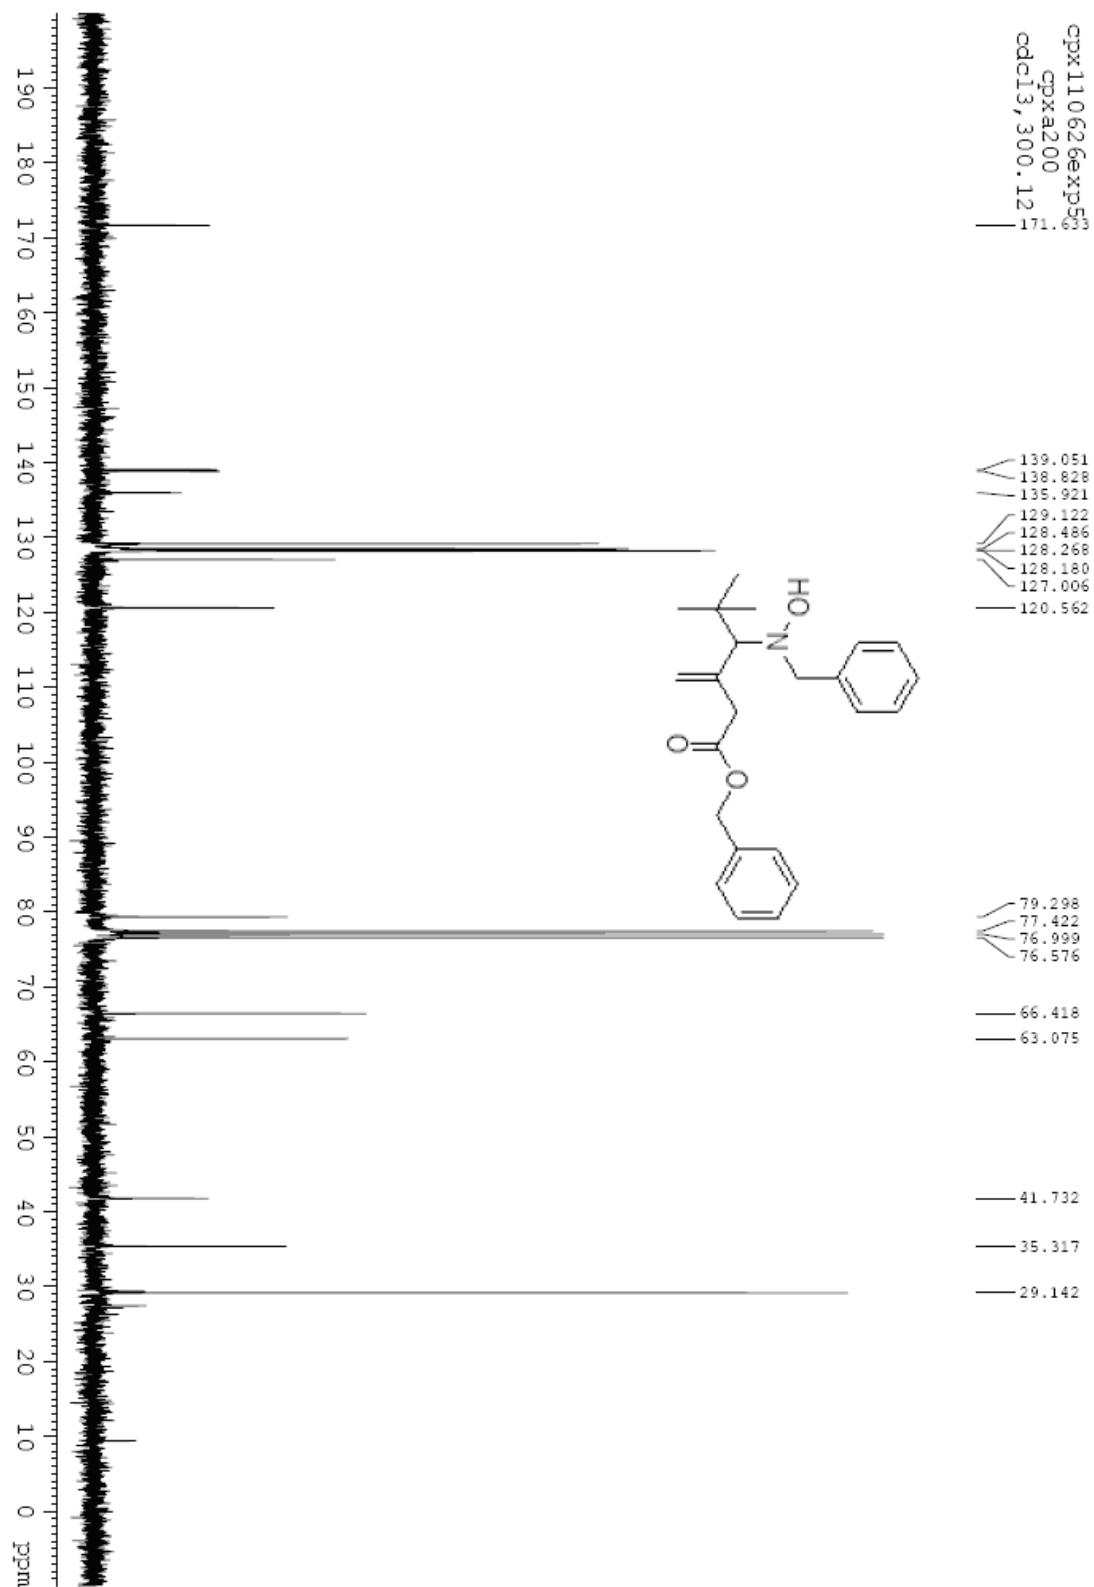

Compound **4ha**:

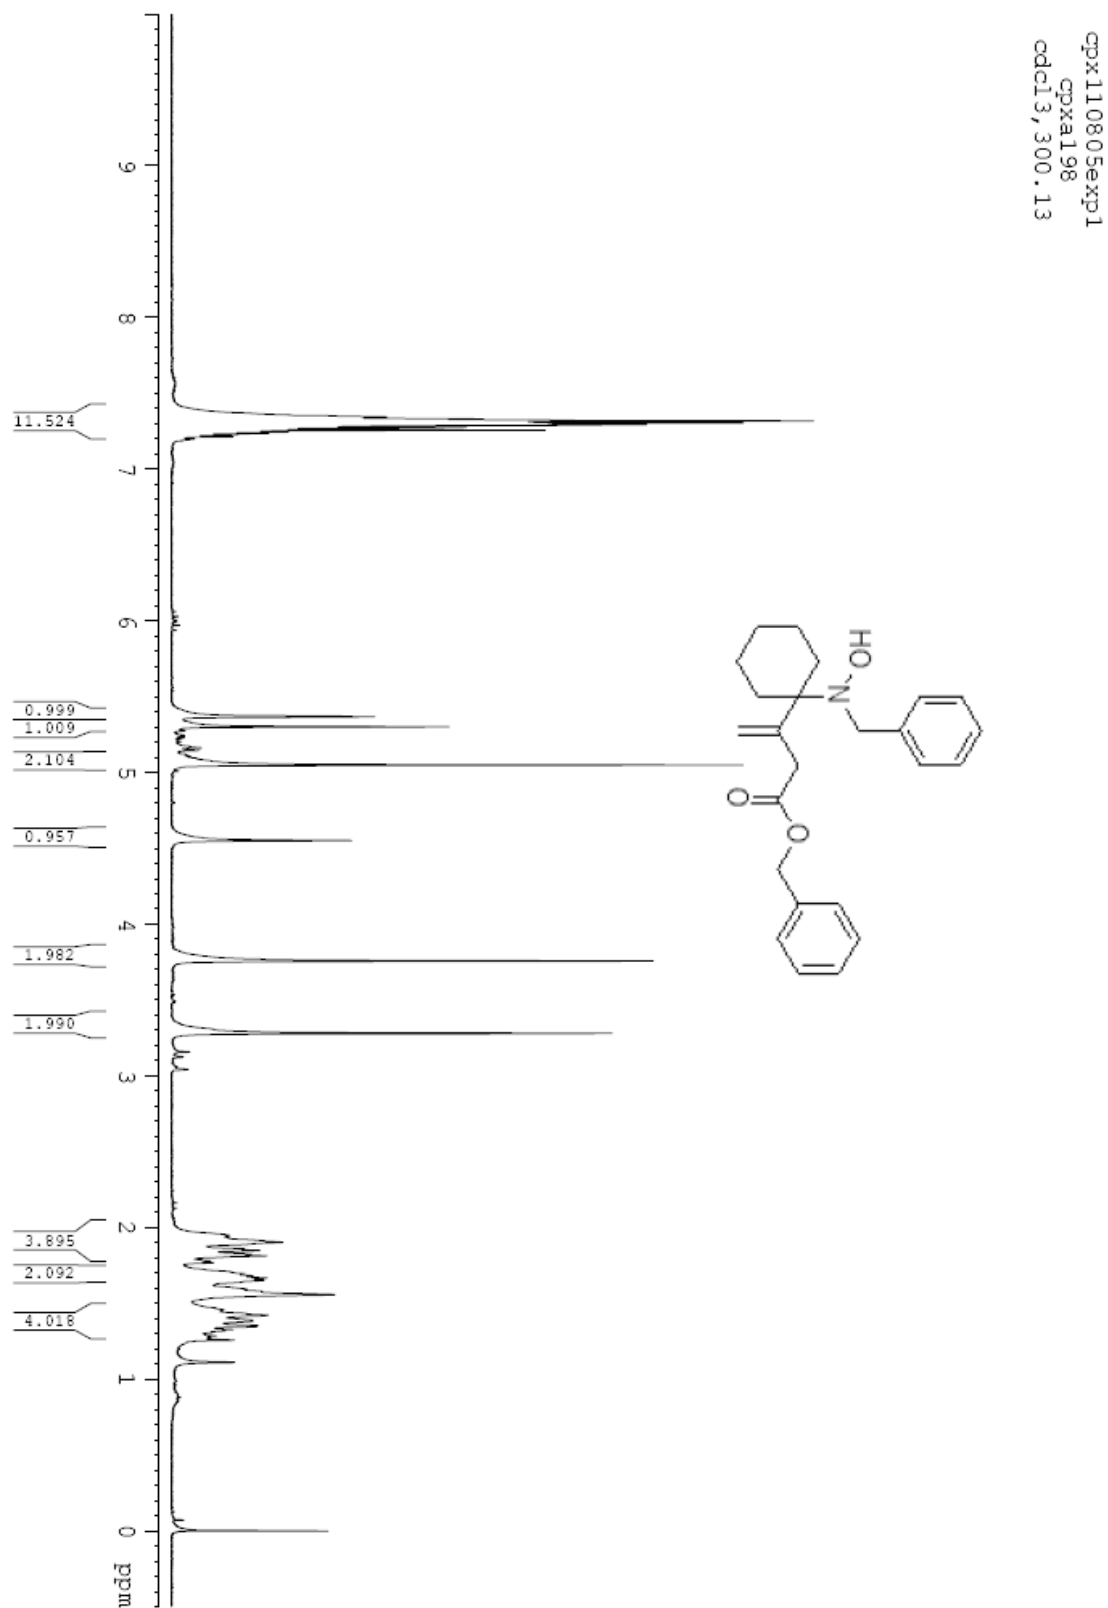

Compound **4ha**:

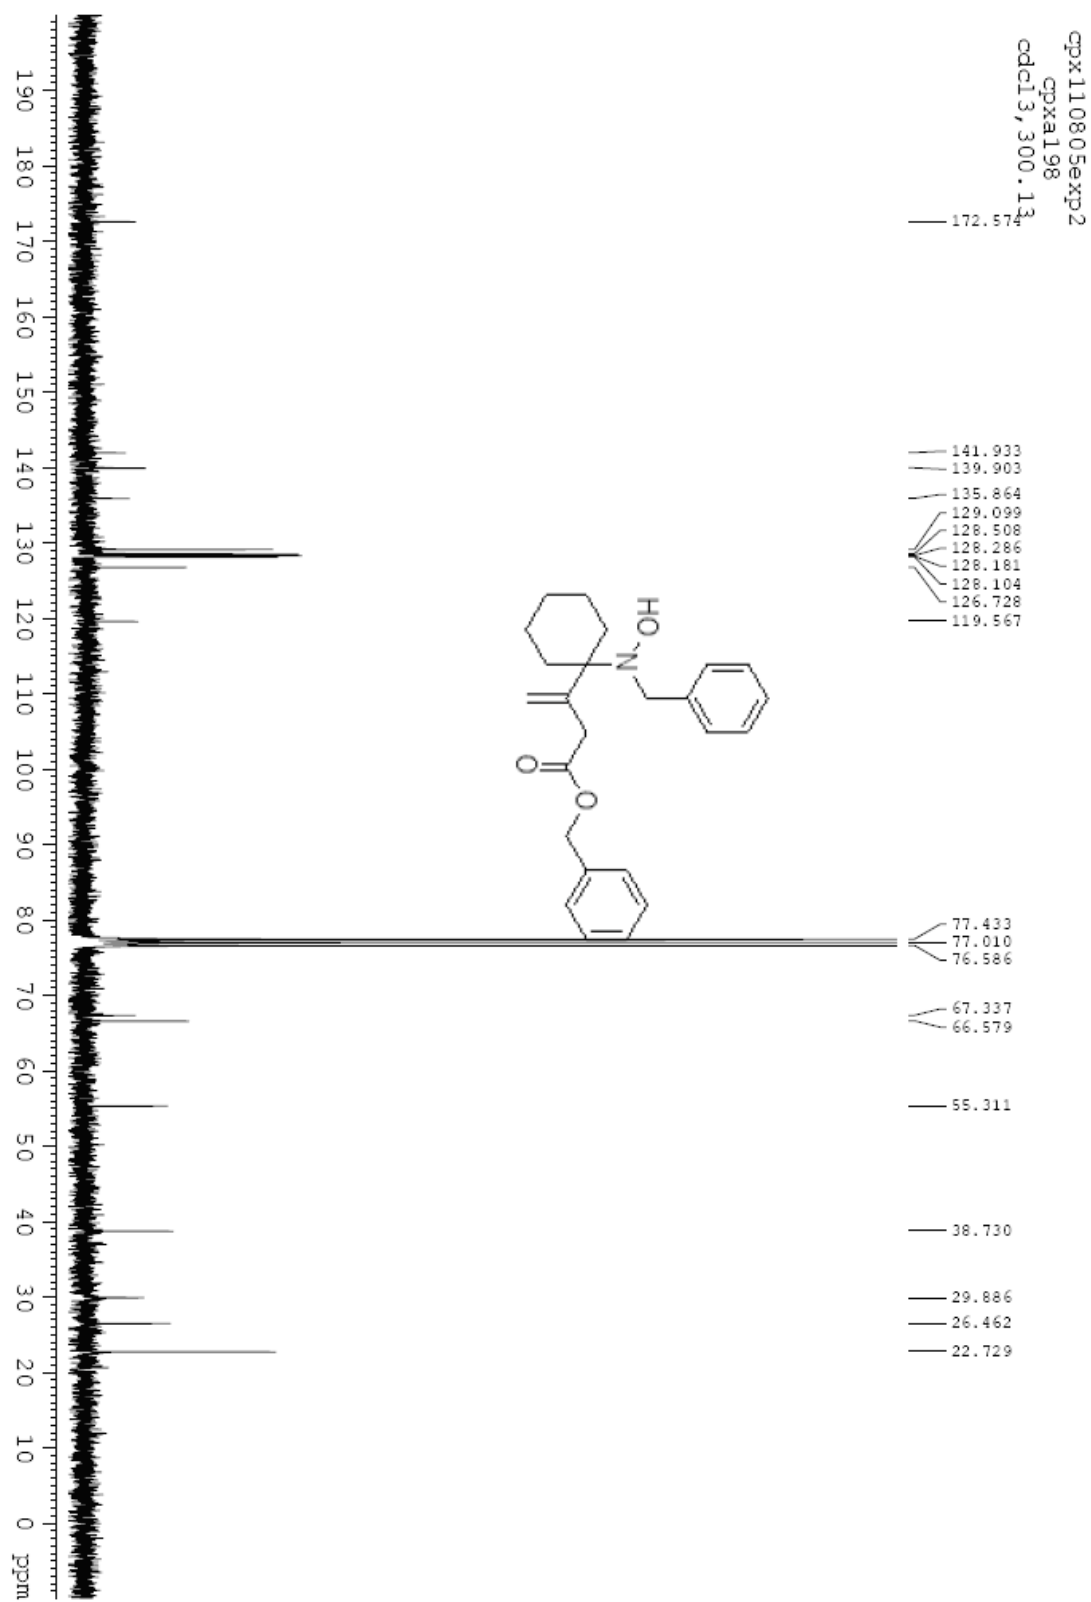

Compound **4ab**:

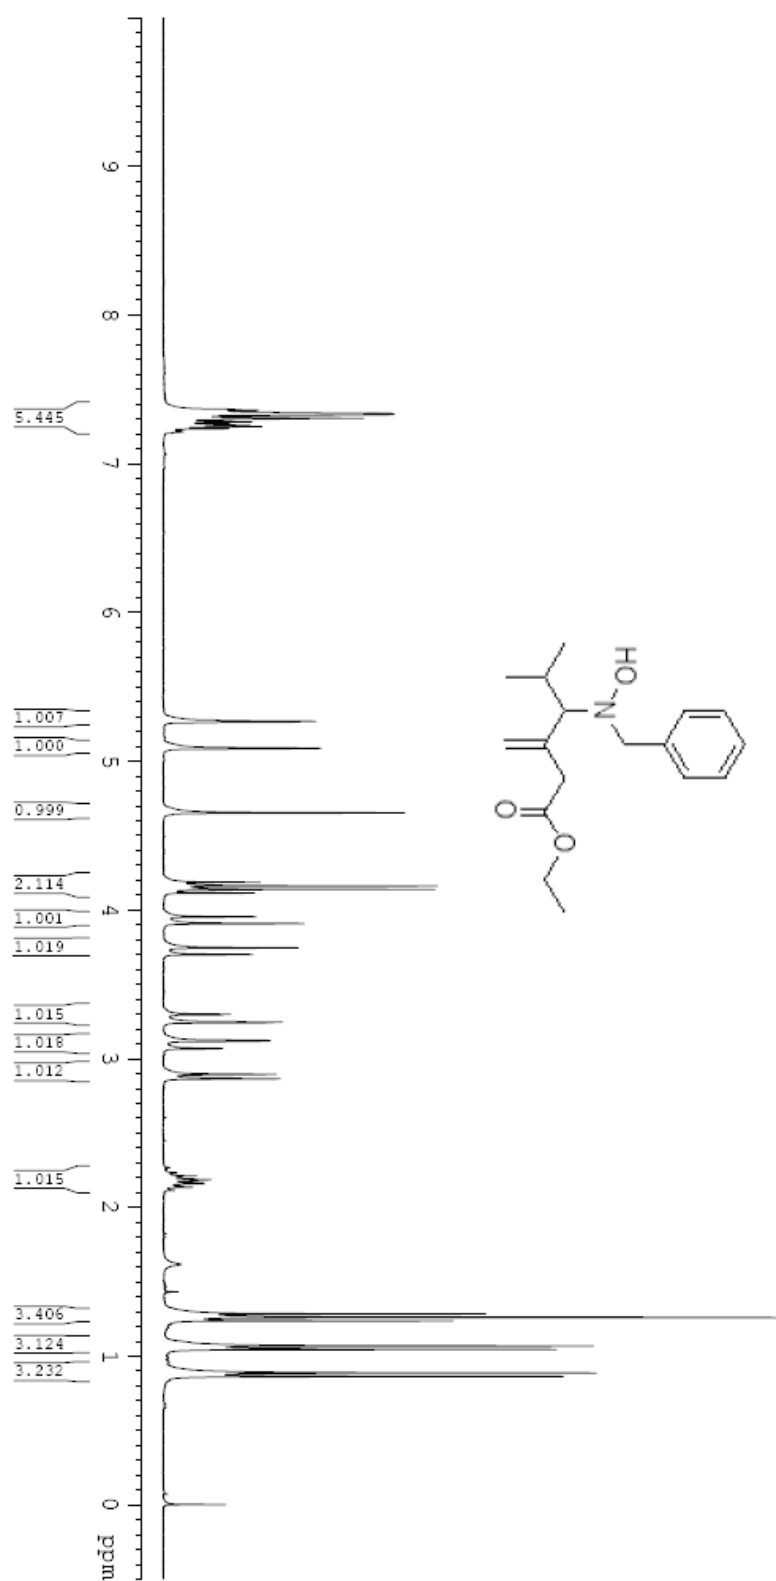

cpx110619exp2  
cpxa193  
cdcl3, 300.12

Compound **4ab**:

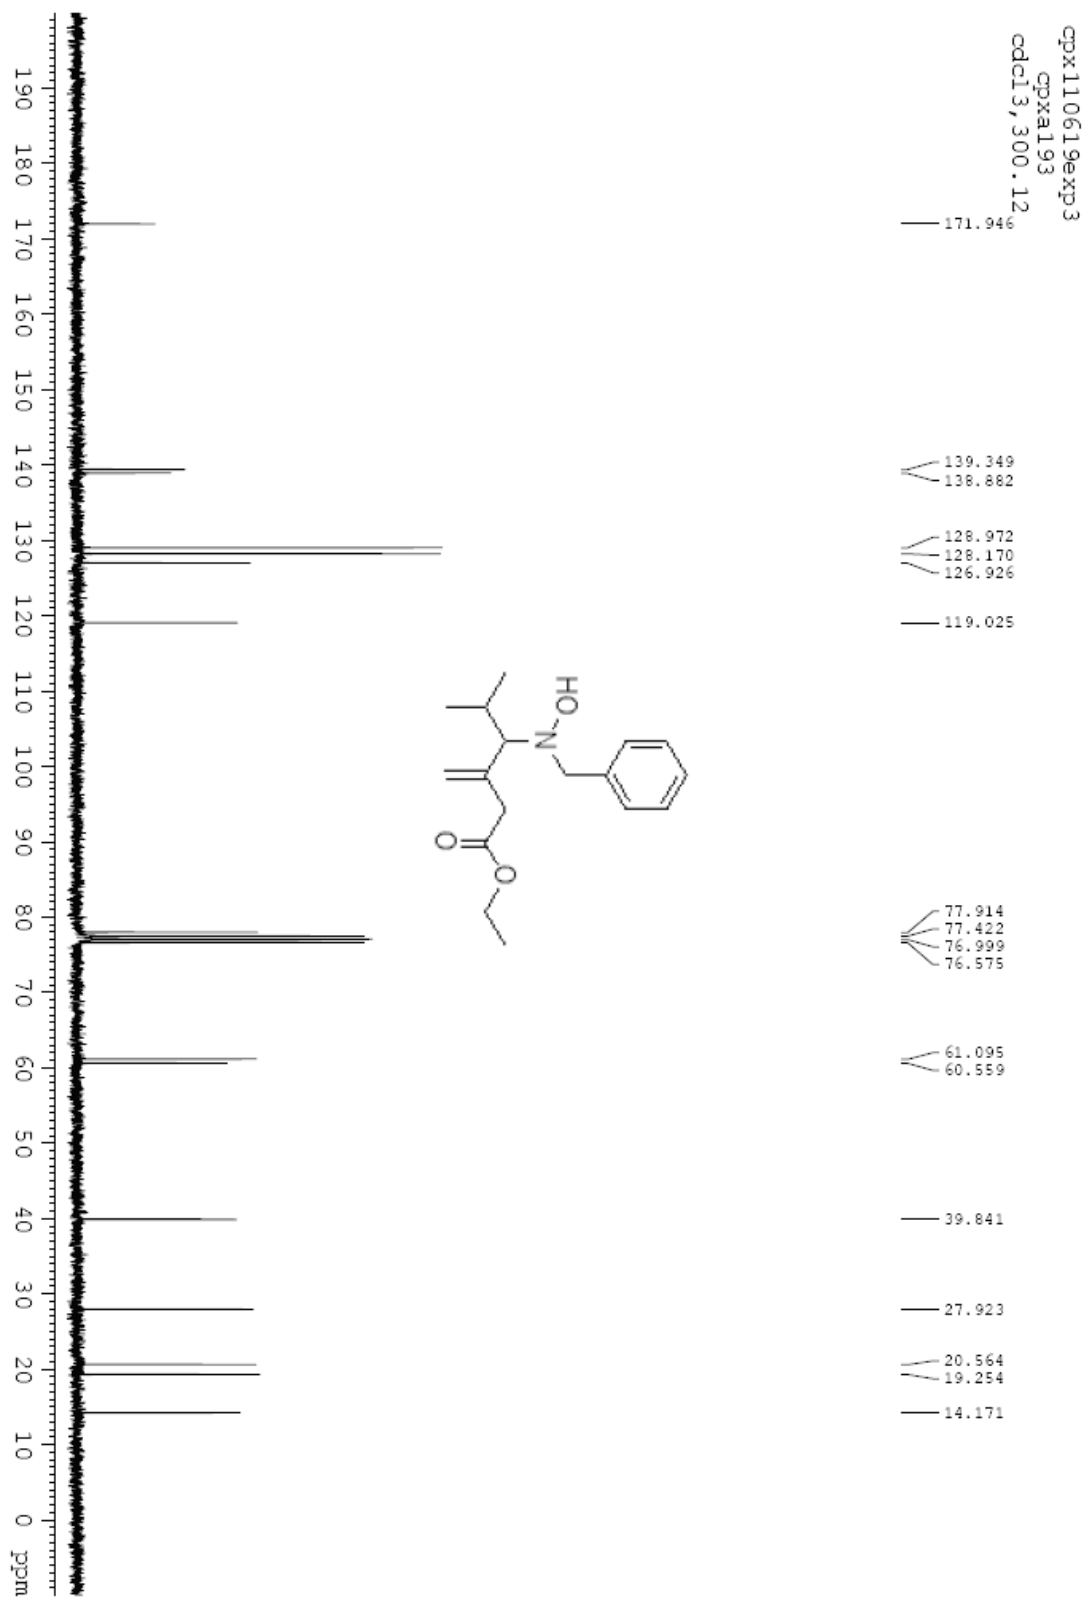

Compound **4ac**:

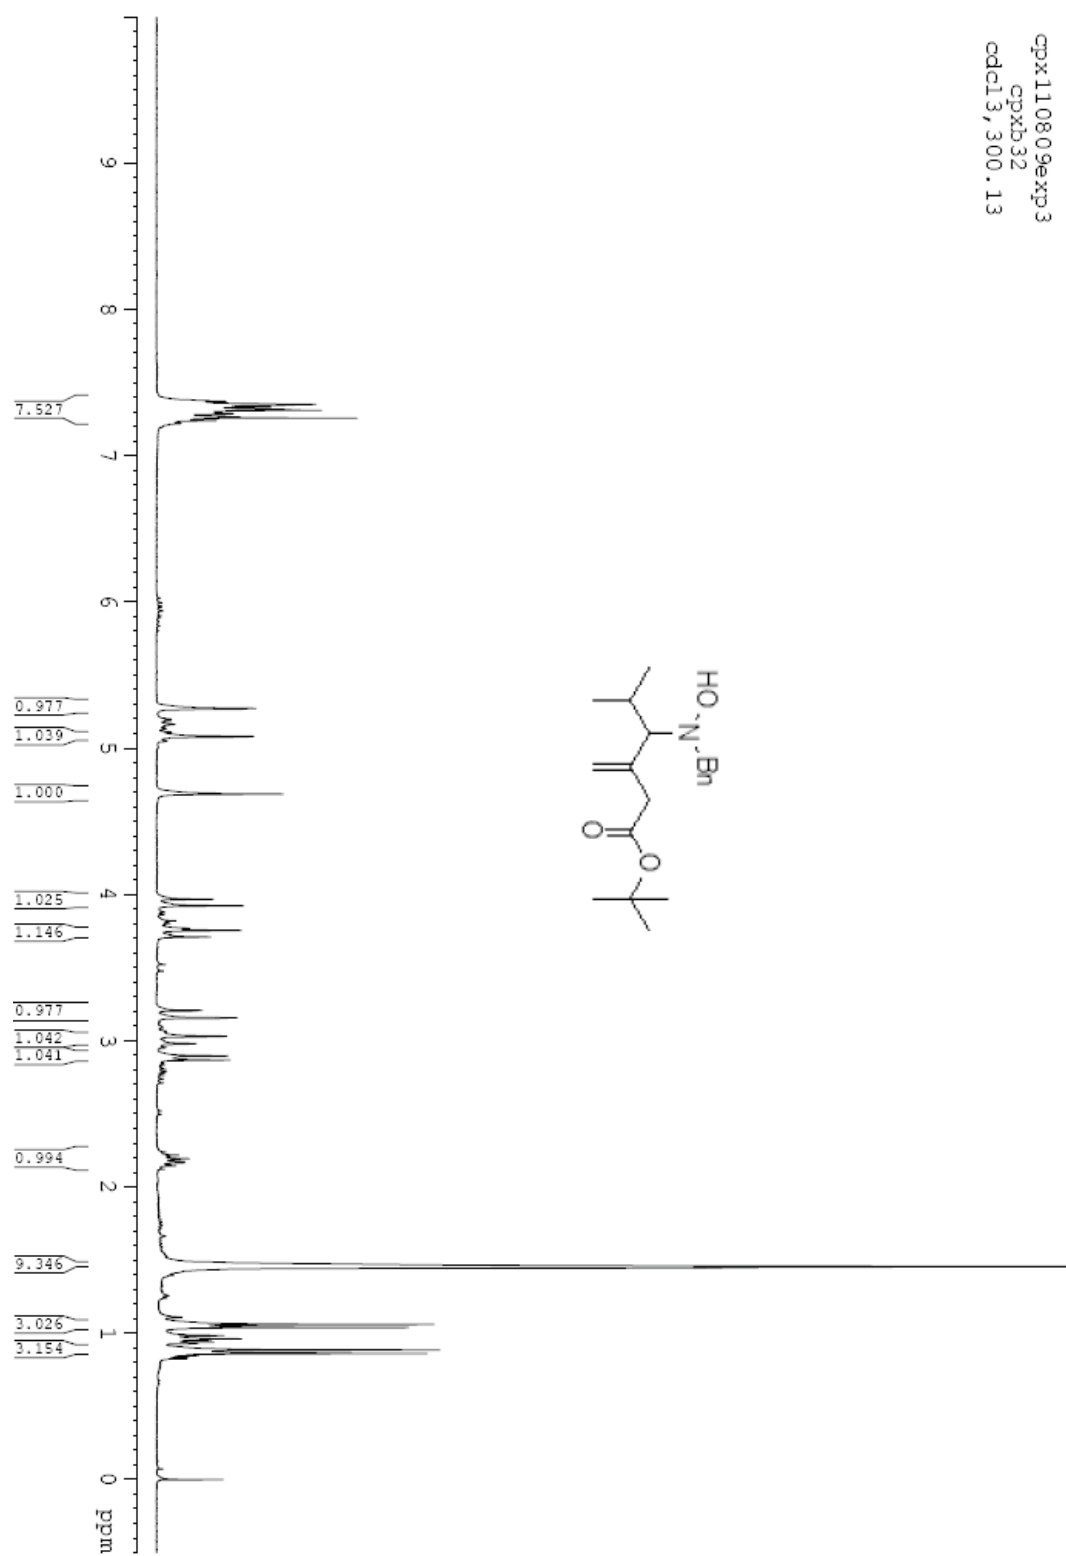

Compound **4ac**:

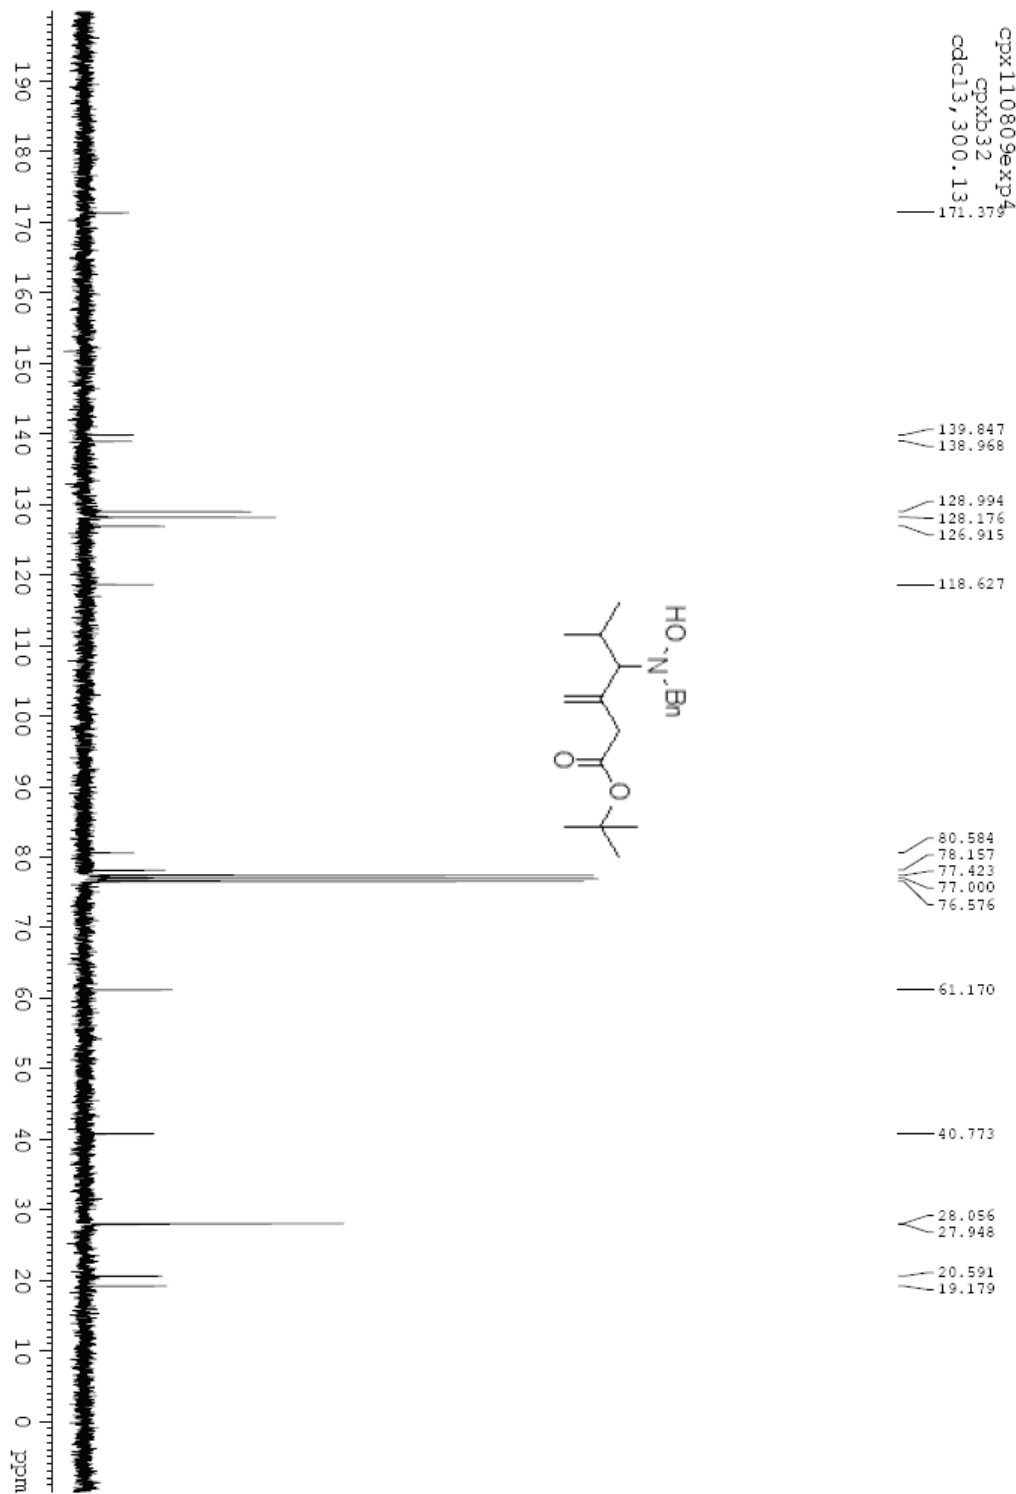

Compound **4cc**:

cpx110813exp2  
cpxb34  
cdcl3, 300.13

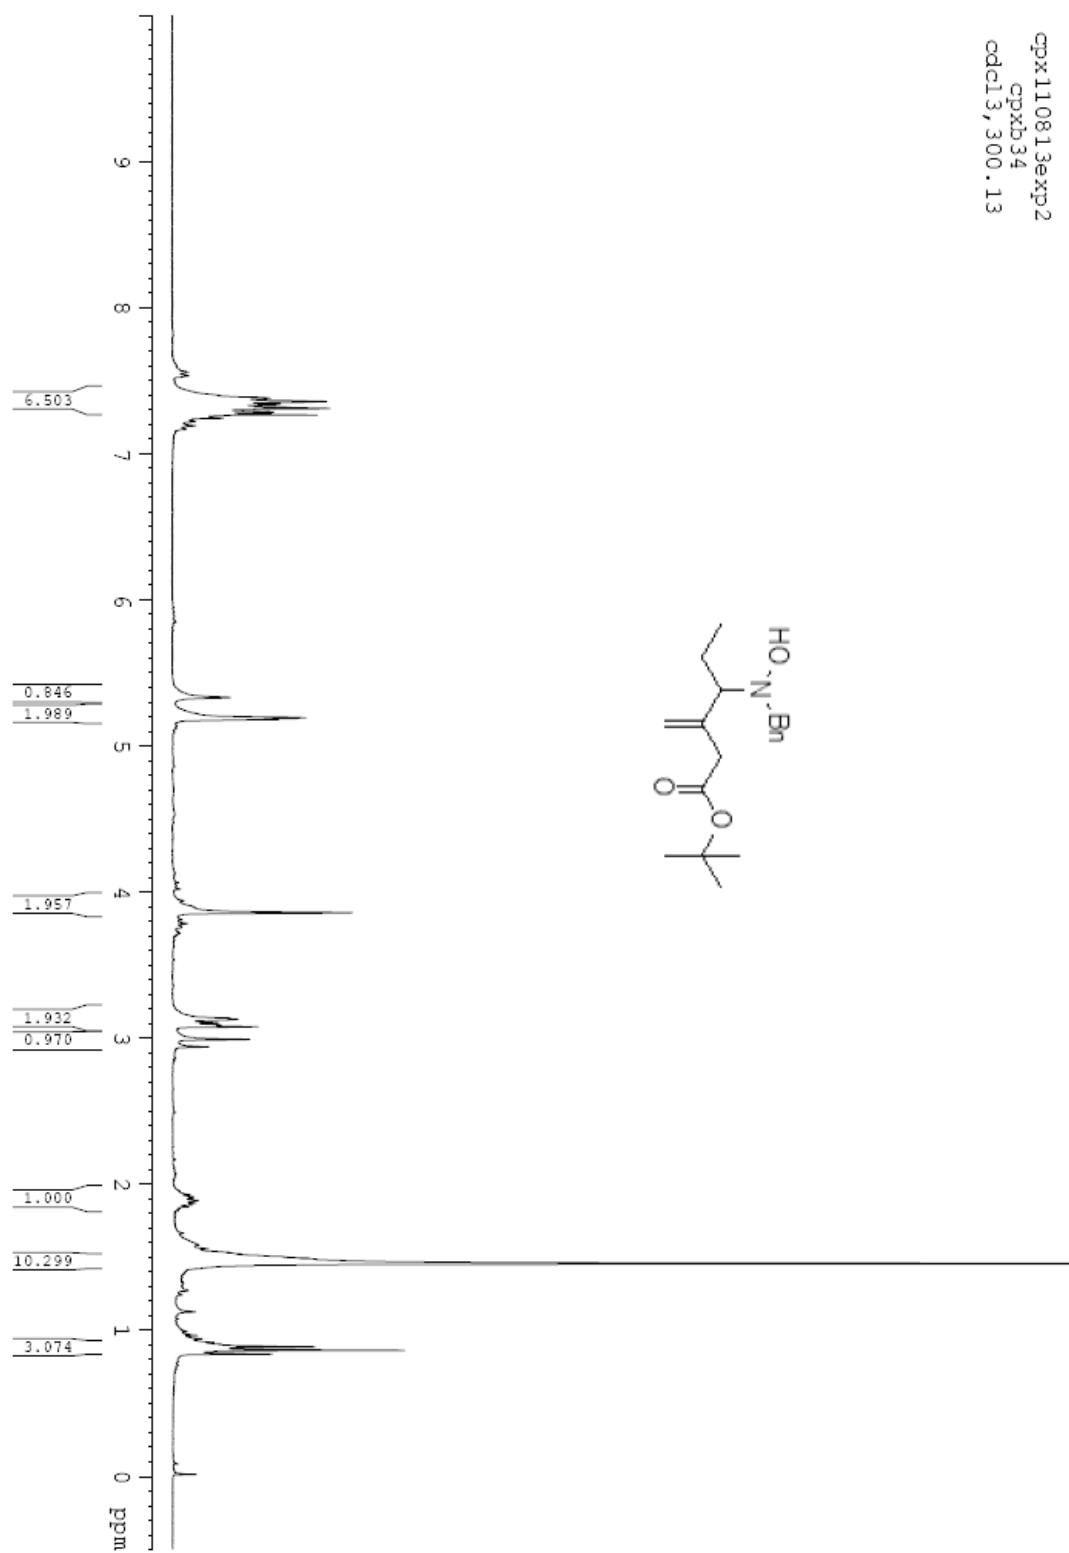



Compound **4cc**:

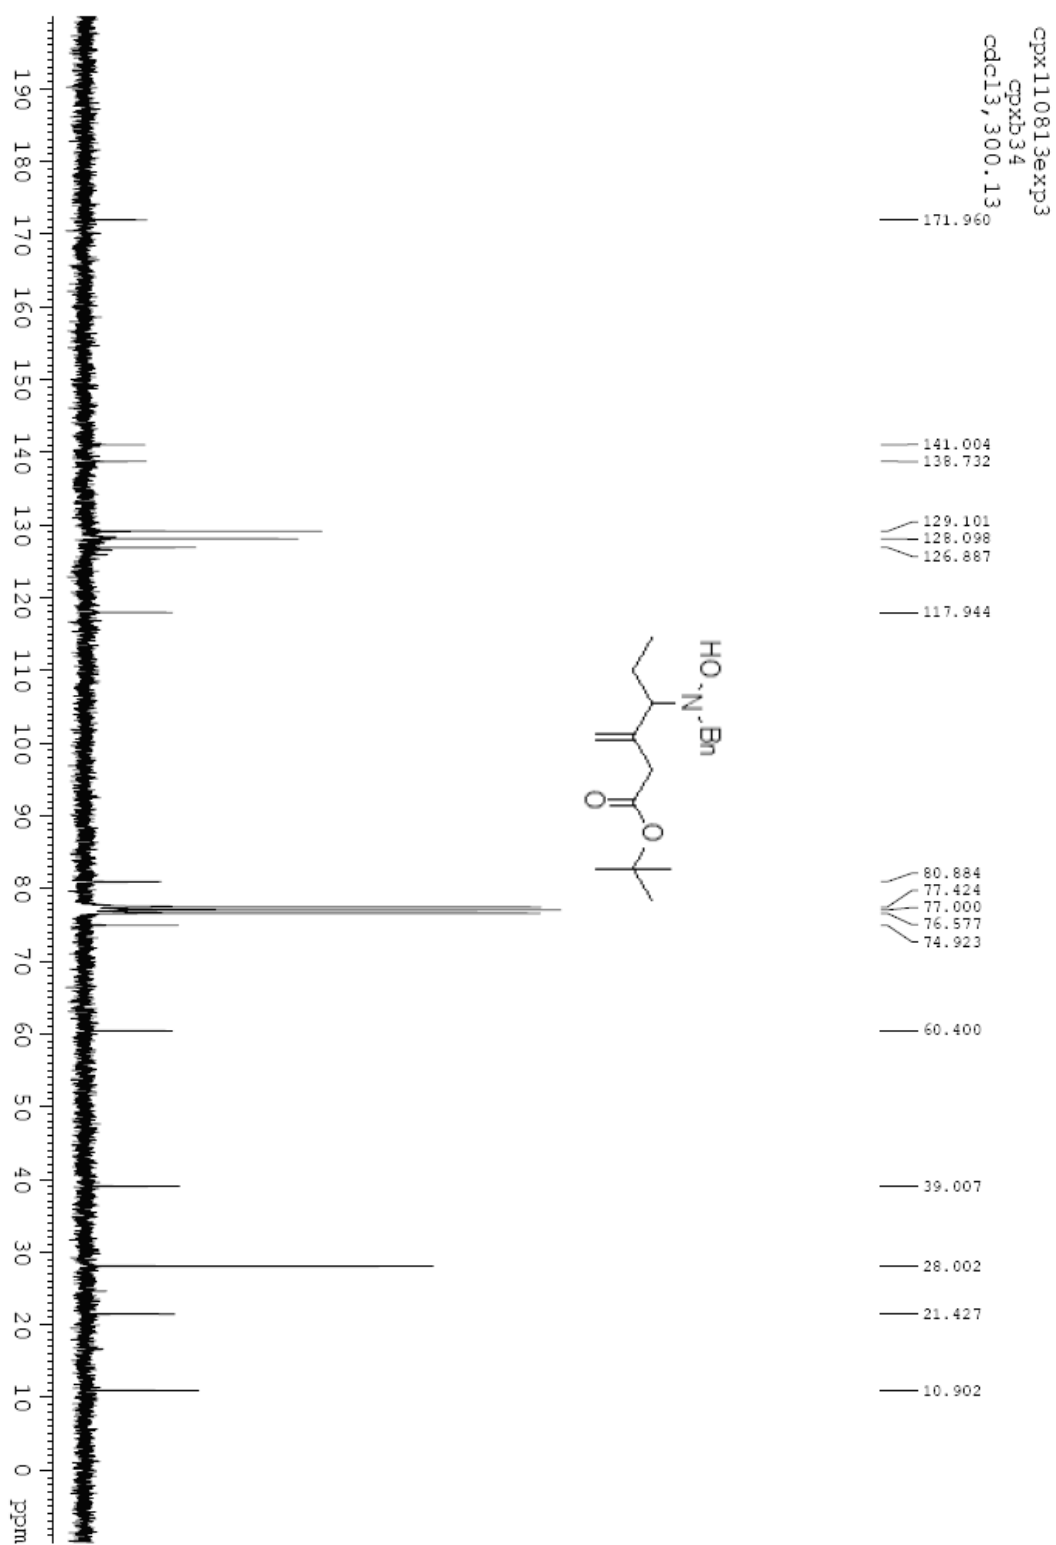

Compound 8:

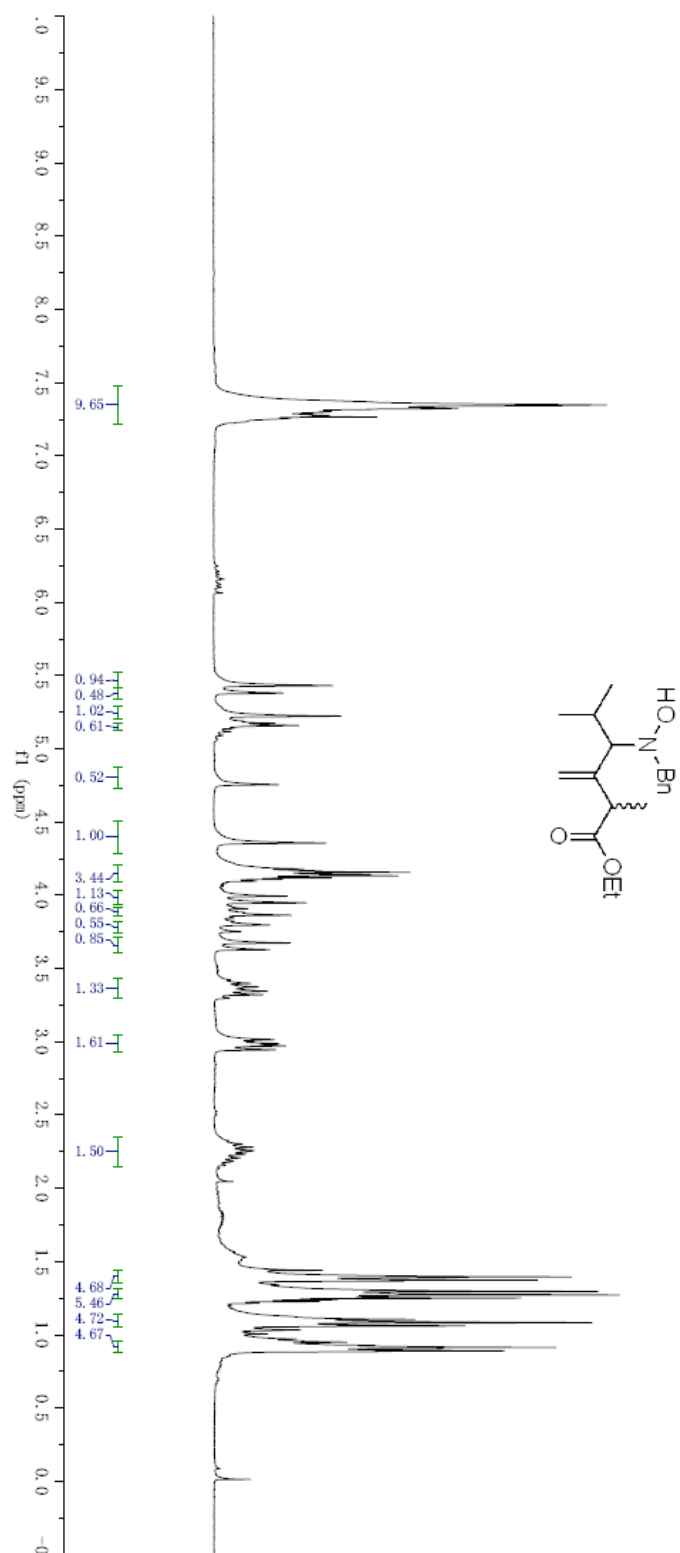

cp1110806  
cp1110806exp2  
cp1110807  
cdcl3, 300, 13

Compound 8:

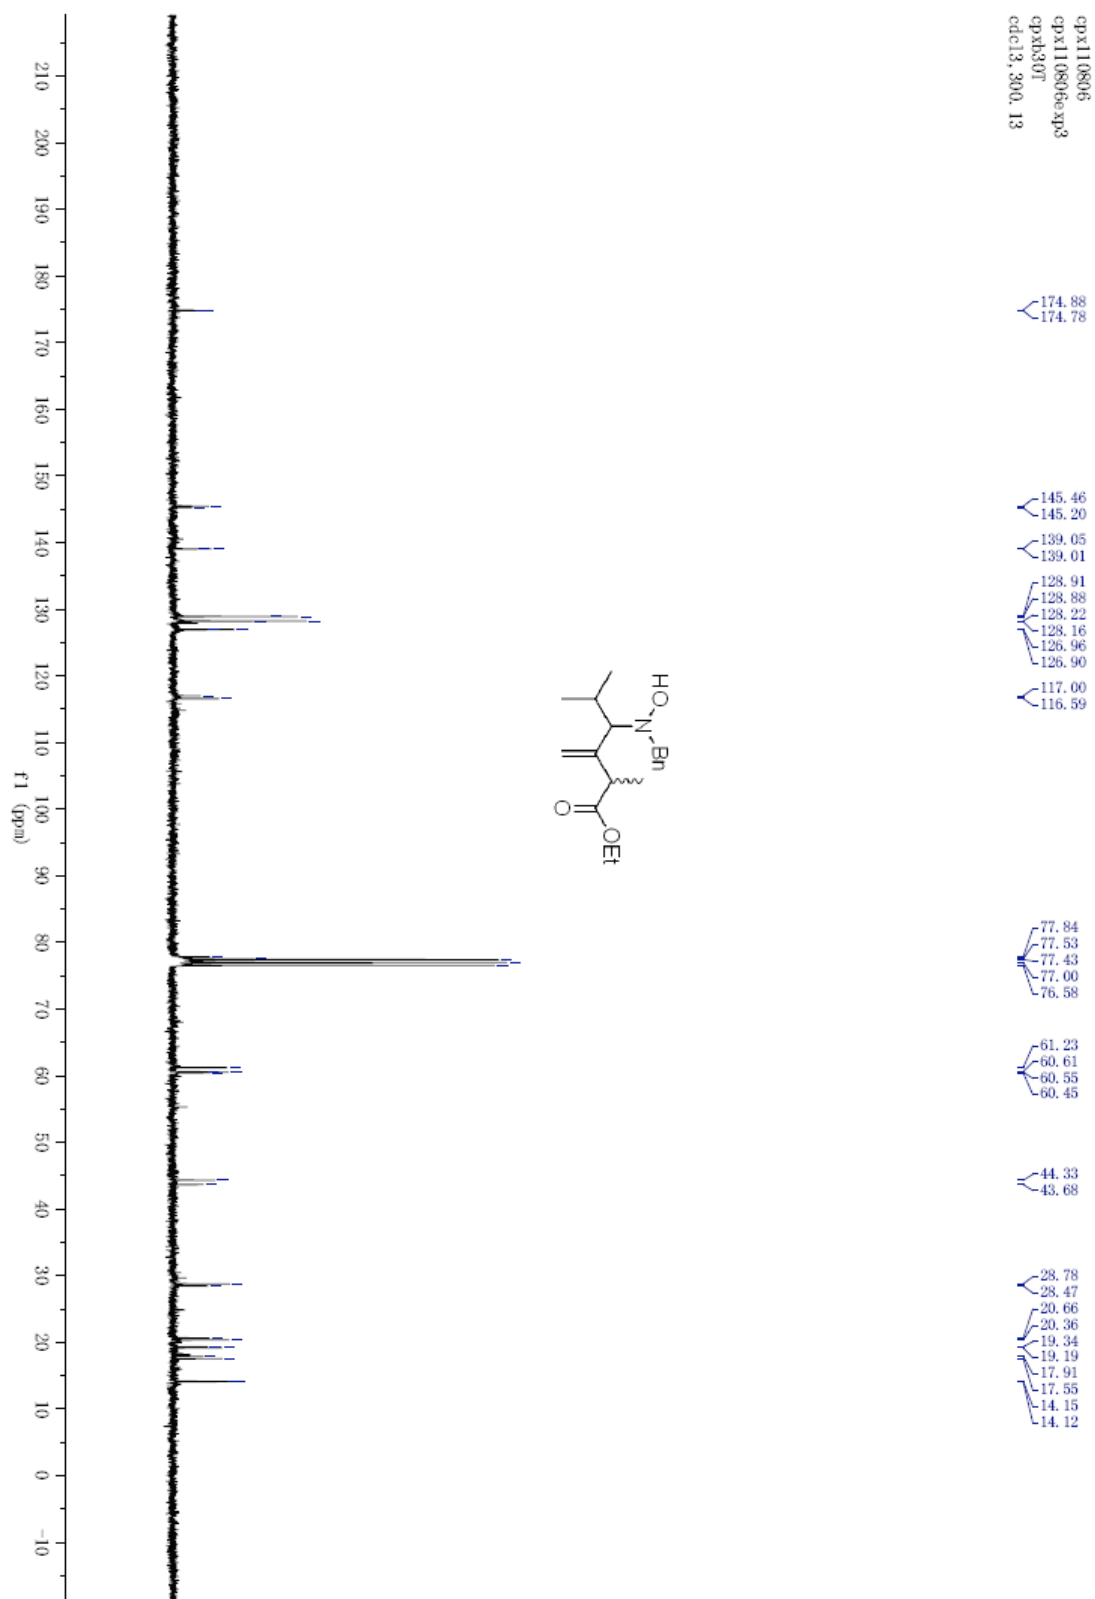

Compound **9**:

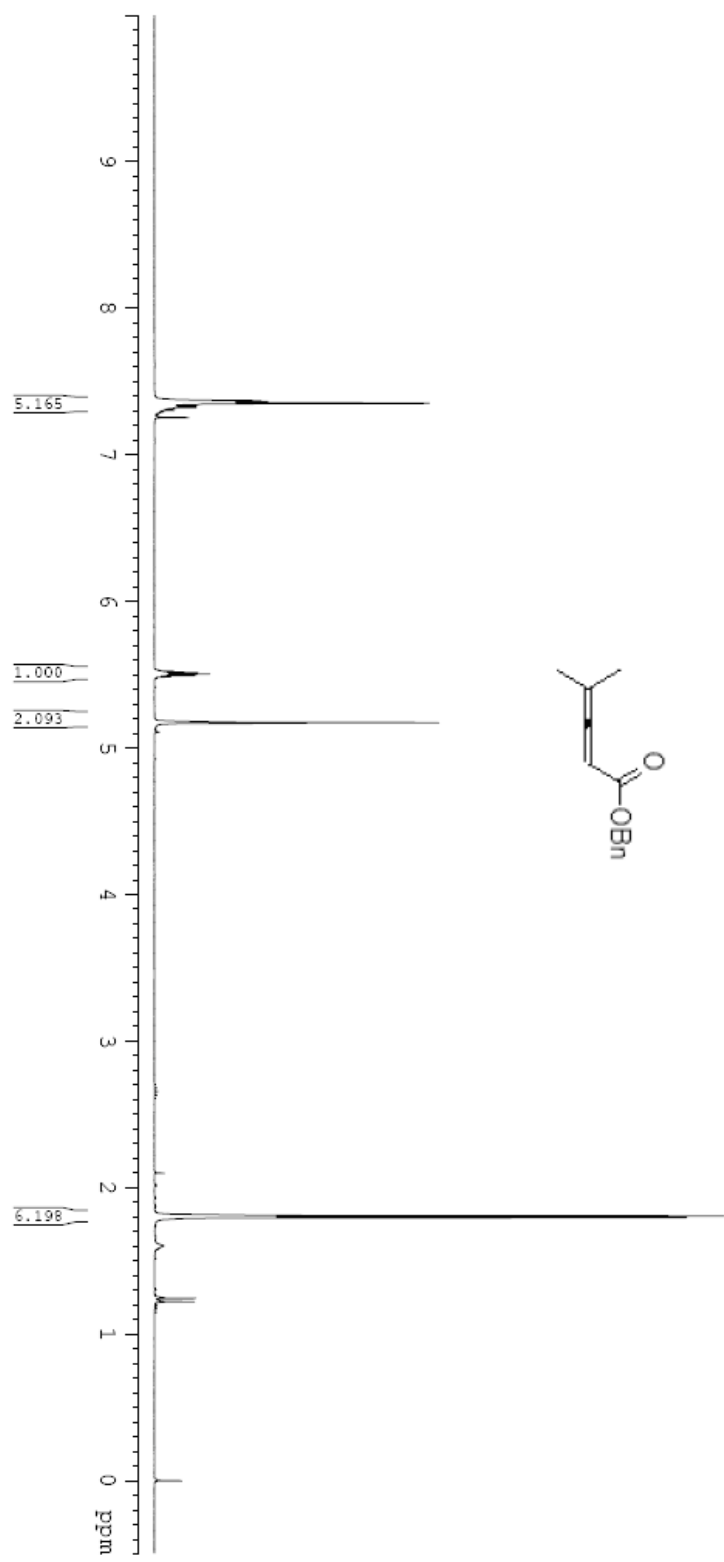

cpx110727exp4  
cpxb19  
cdcl3, 300.12

Compound 9:

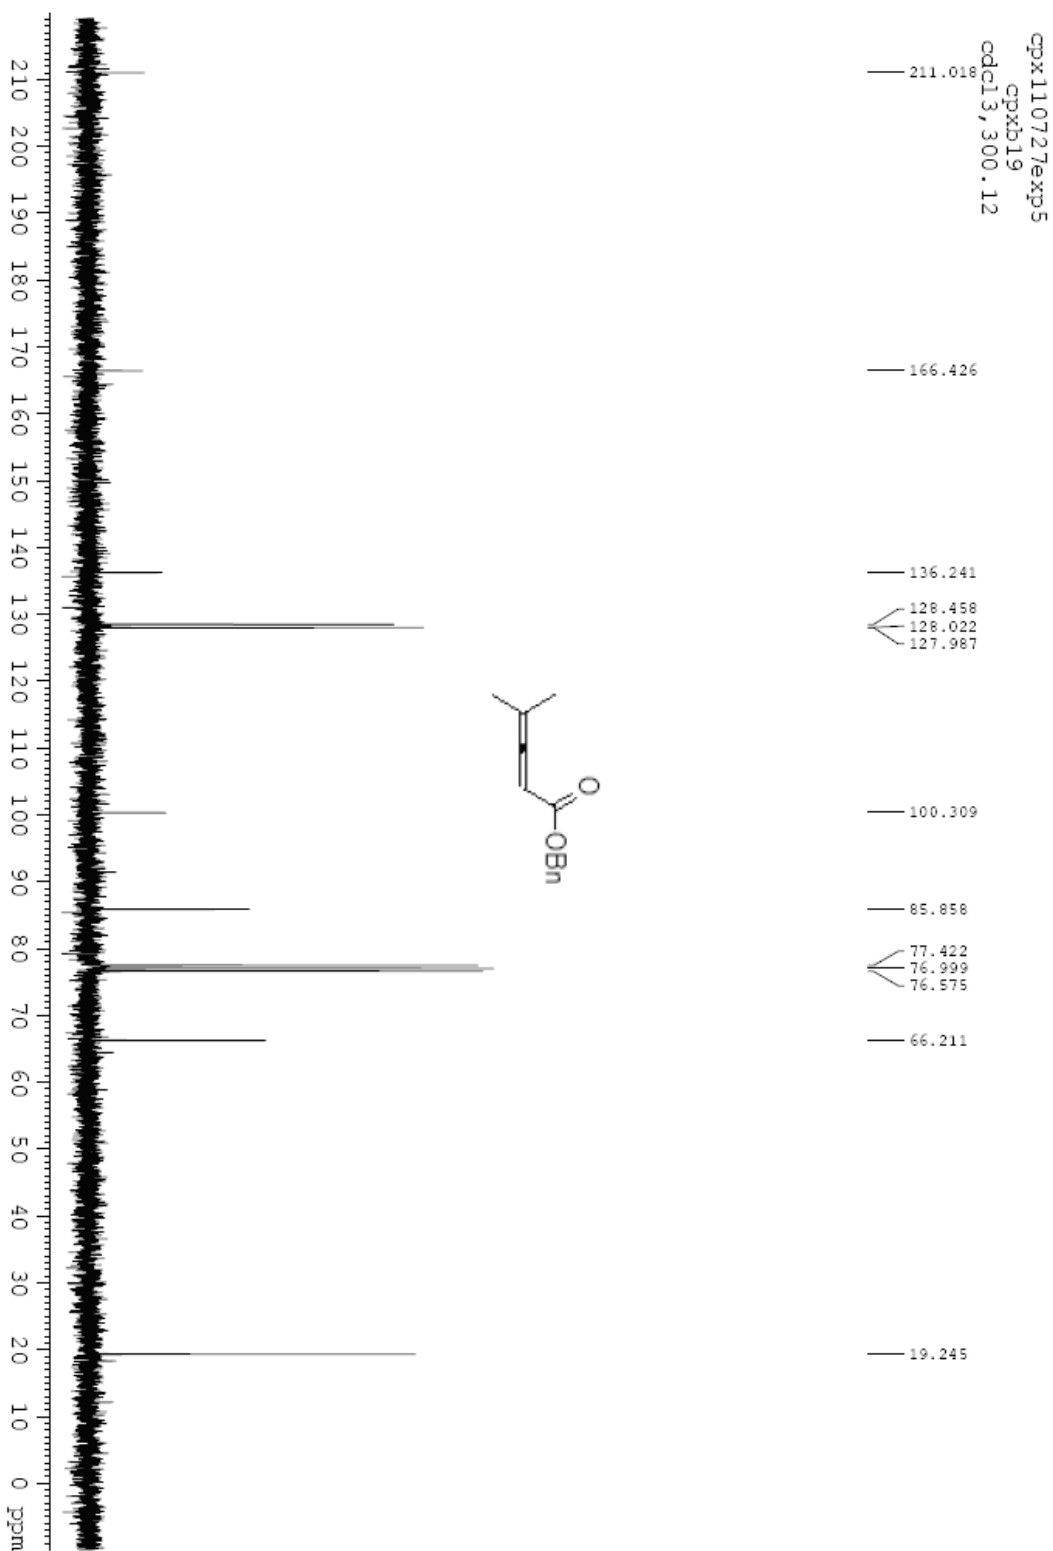

Compound 10:

cpx110730exp2  
cpxb22  
cdcl3, 300, 13

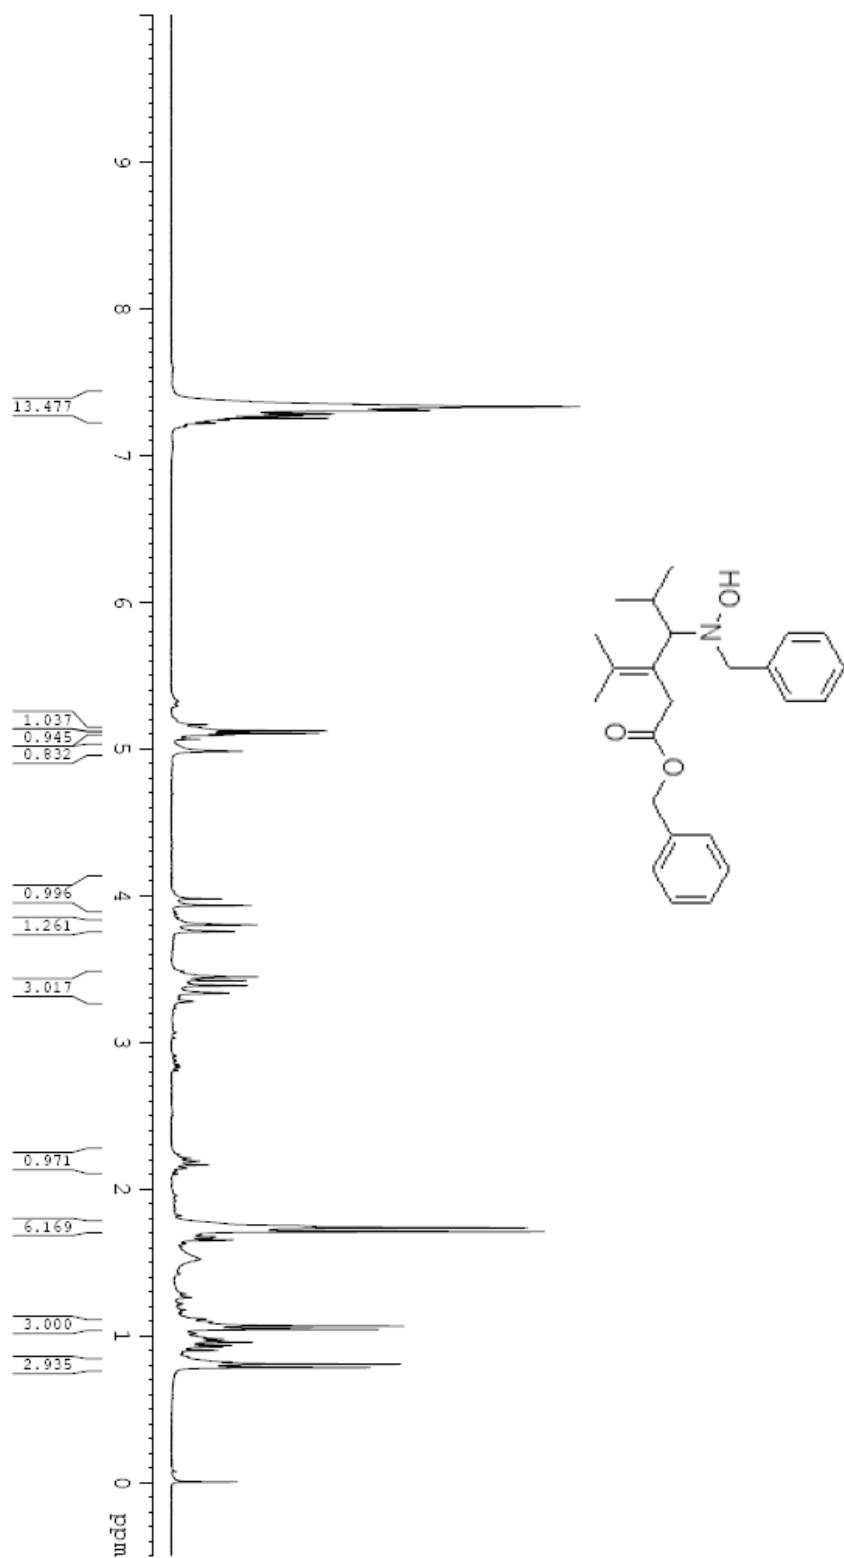

Compound 10:

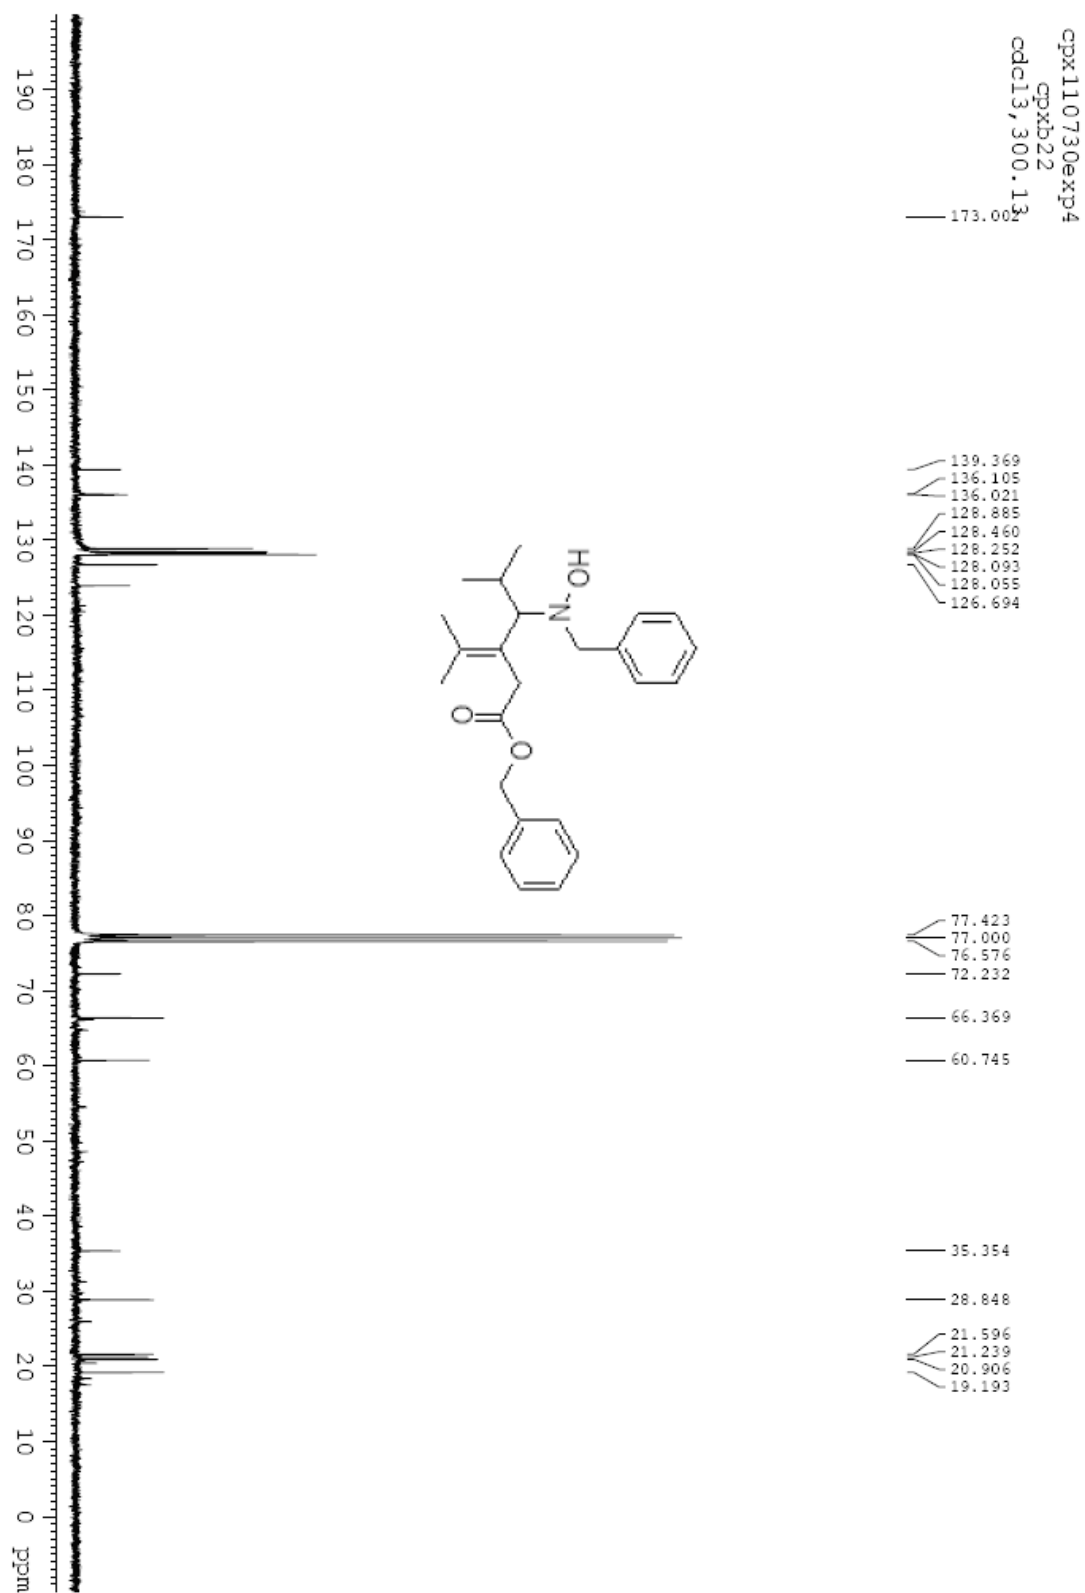

Compound **5a**:

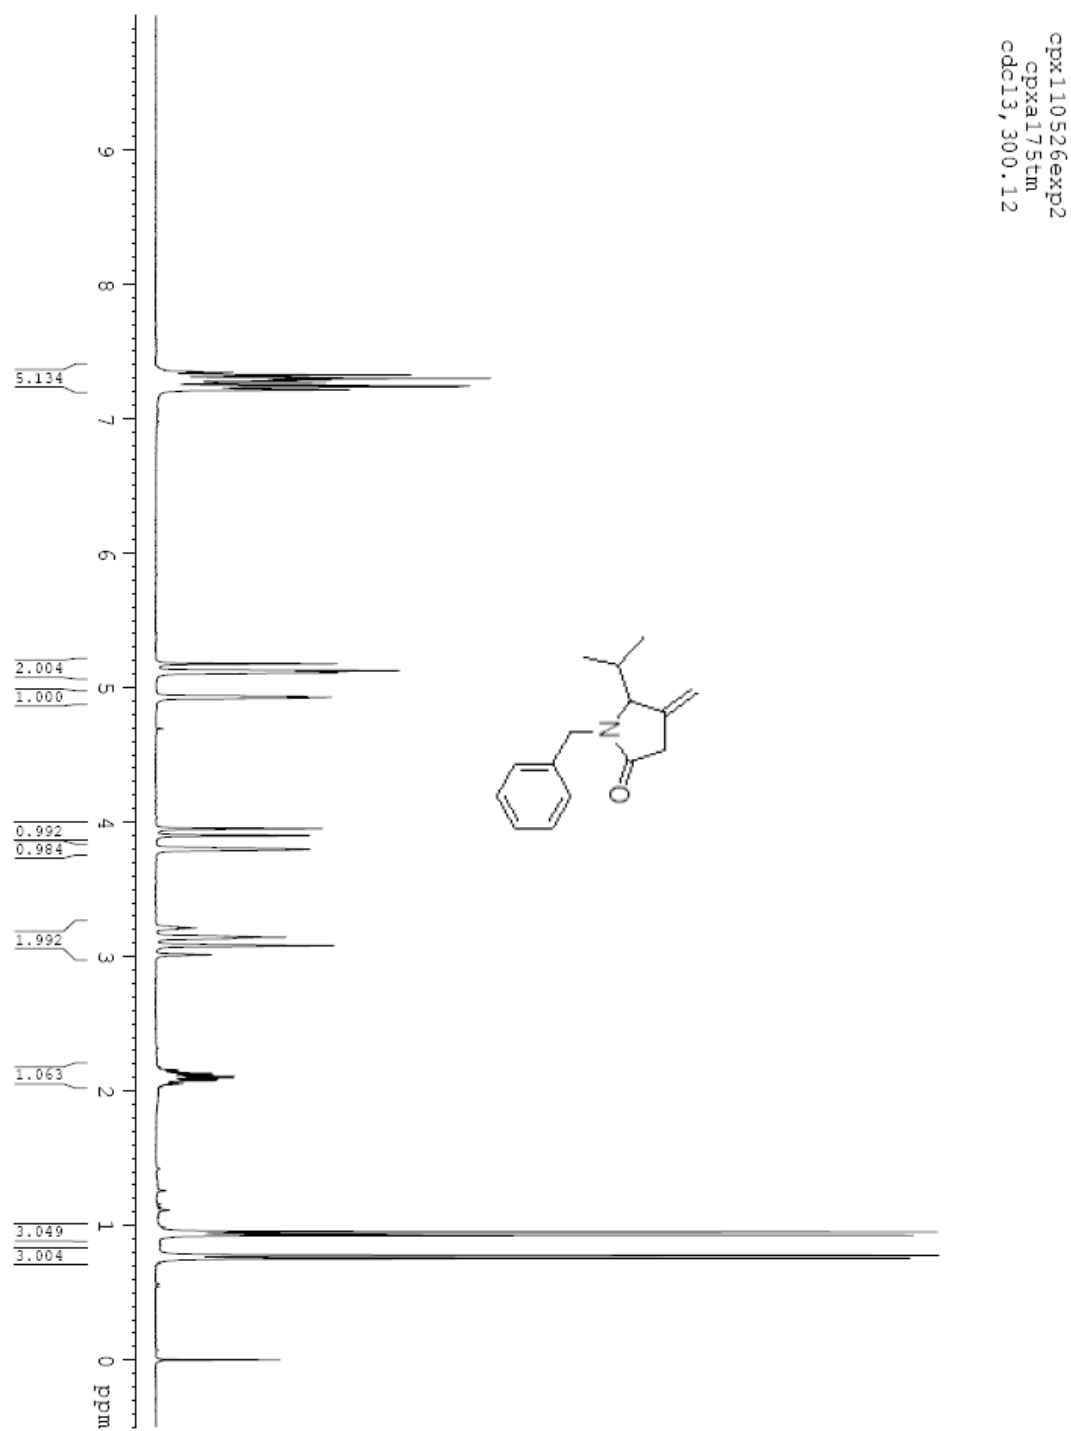



Compound **5a**:

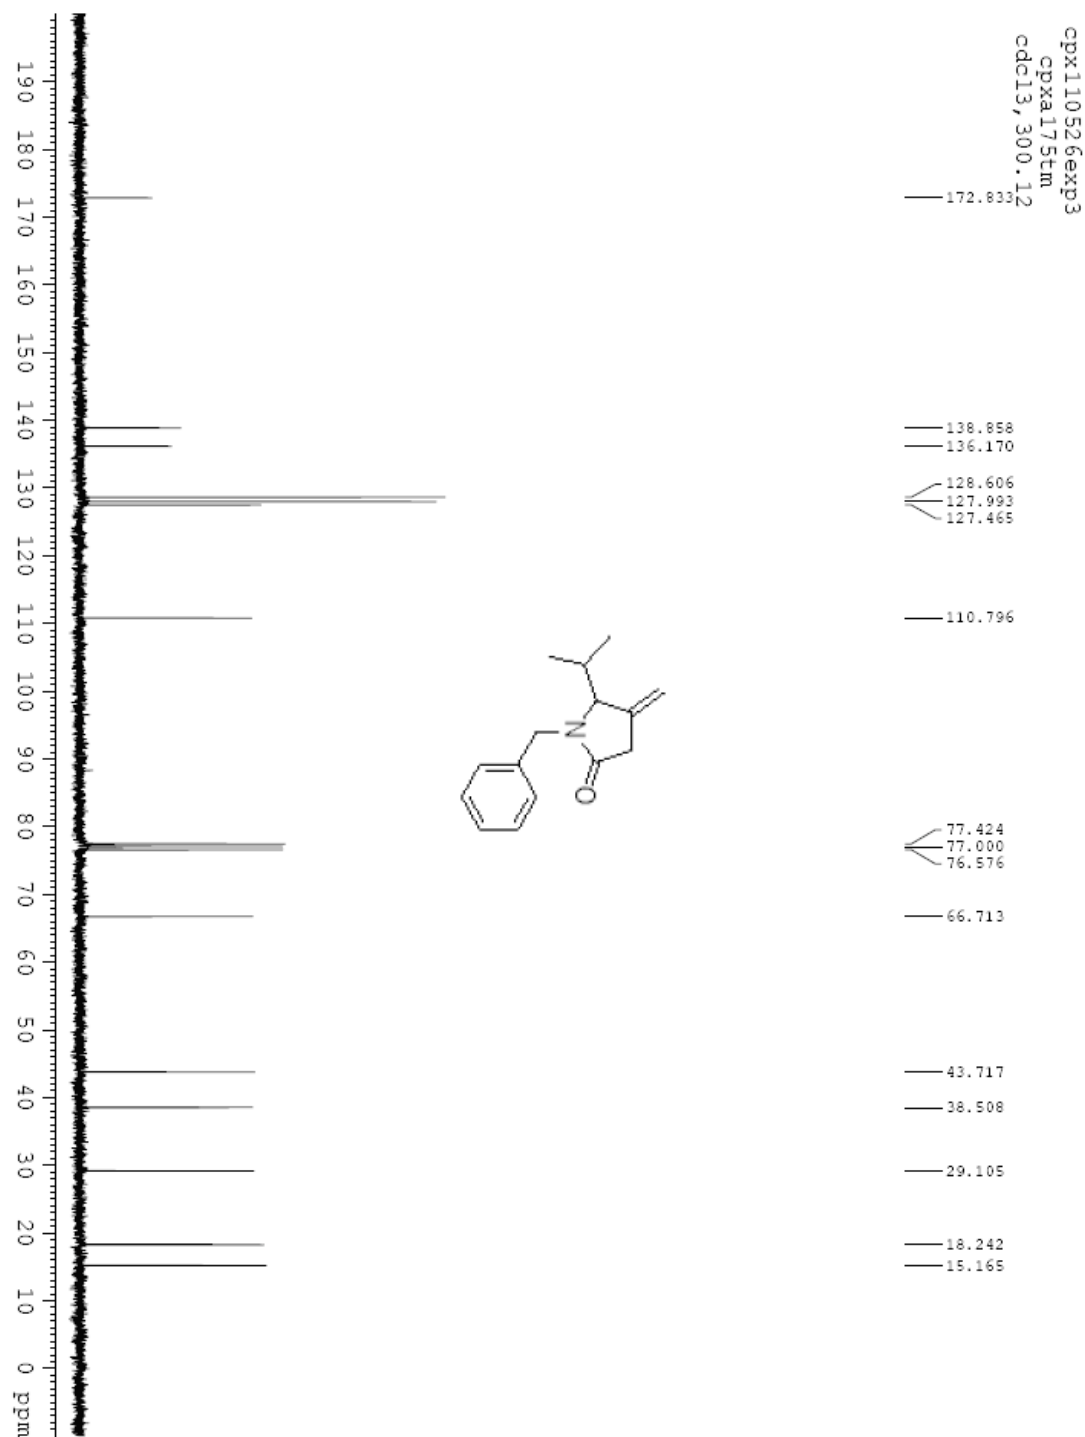

Compound **5b**:

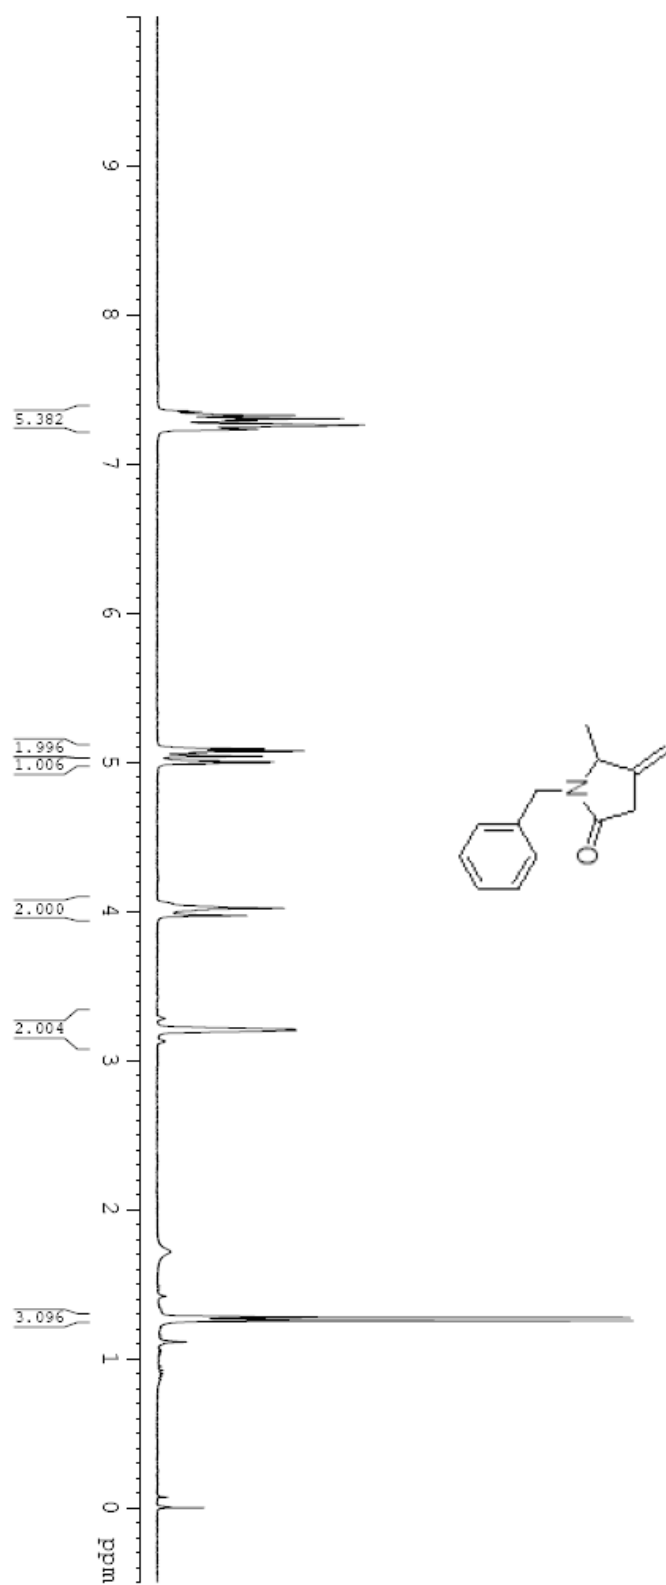

cpx110707exp1  
cpxb11  
cdcl3, 300.12

Compound **5b**:

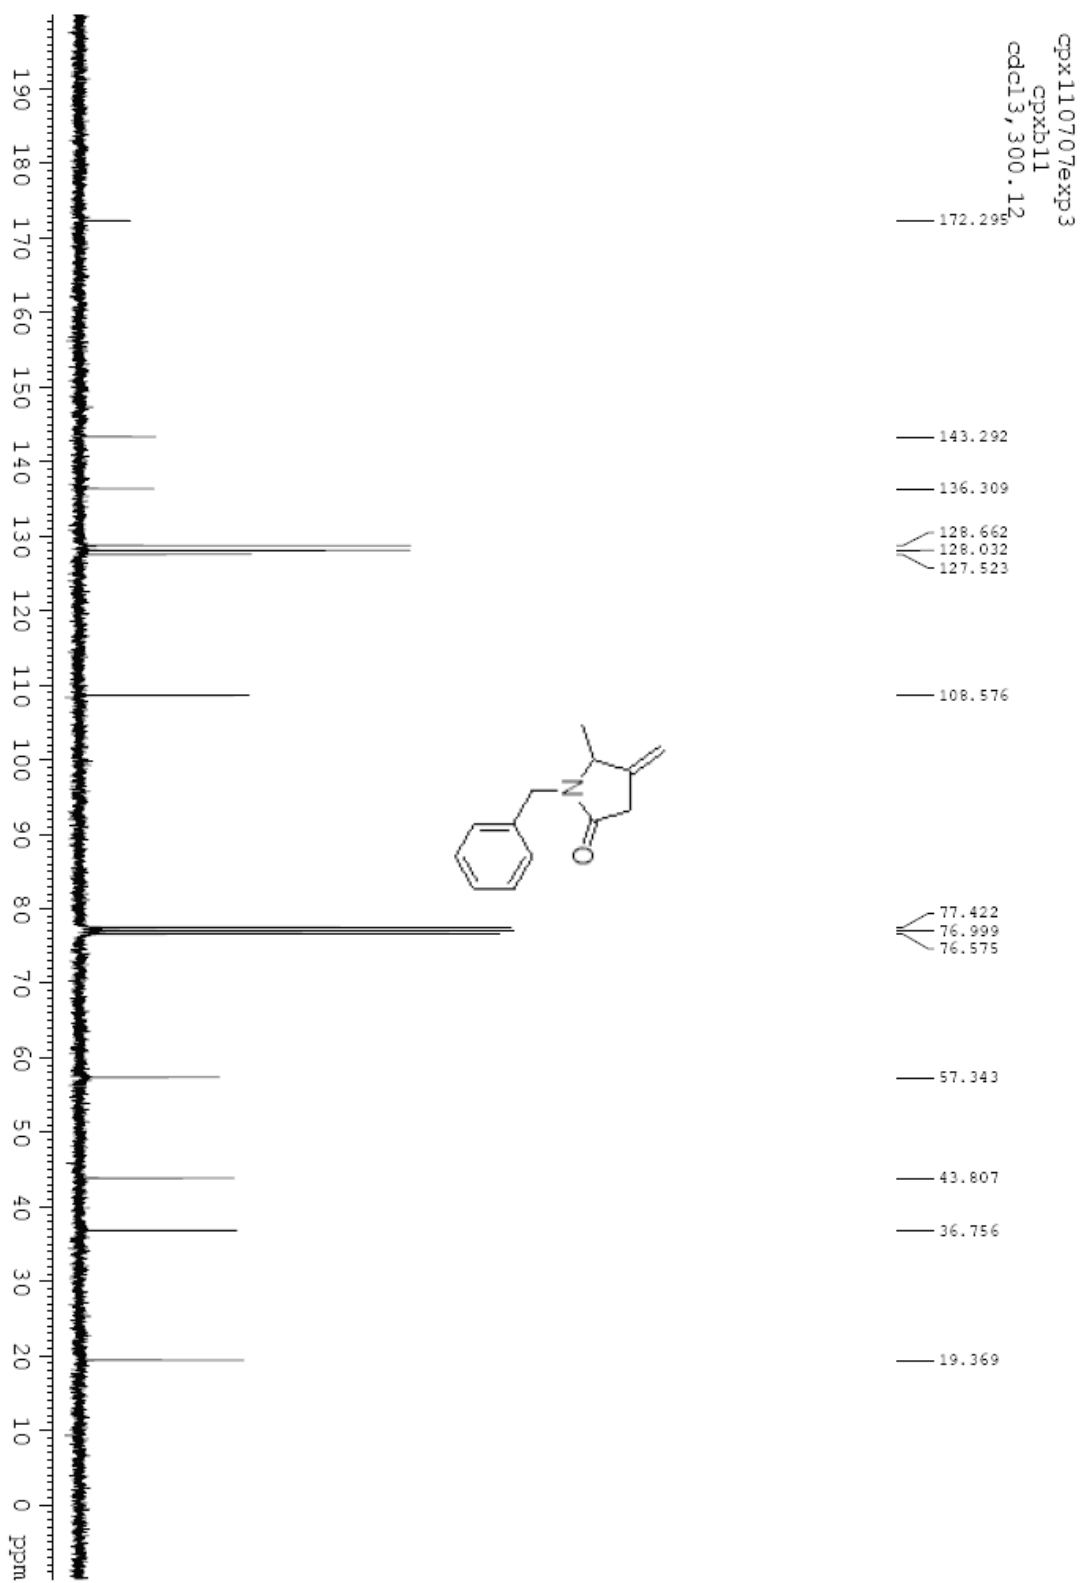

Compound **5c**:

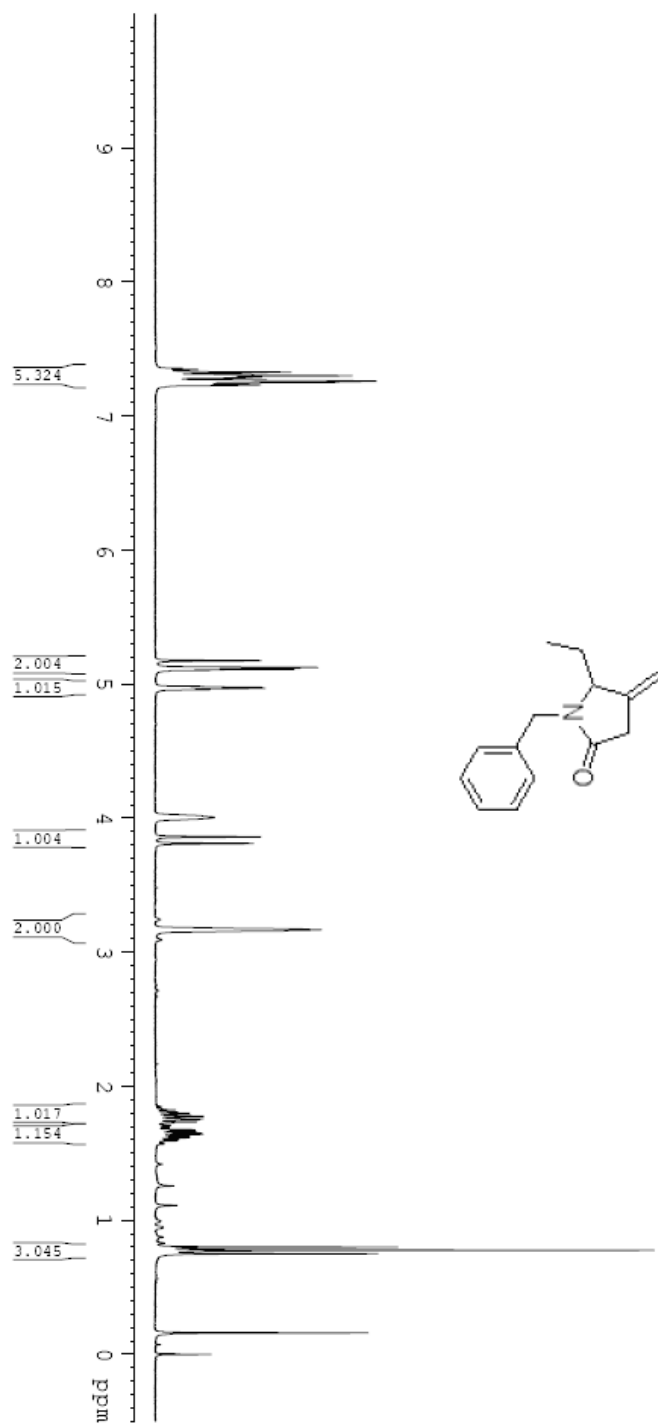

cpx110610exp1  
cpxa185  
cdcl3, 300.12

Compound **5c**:

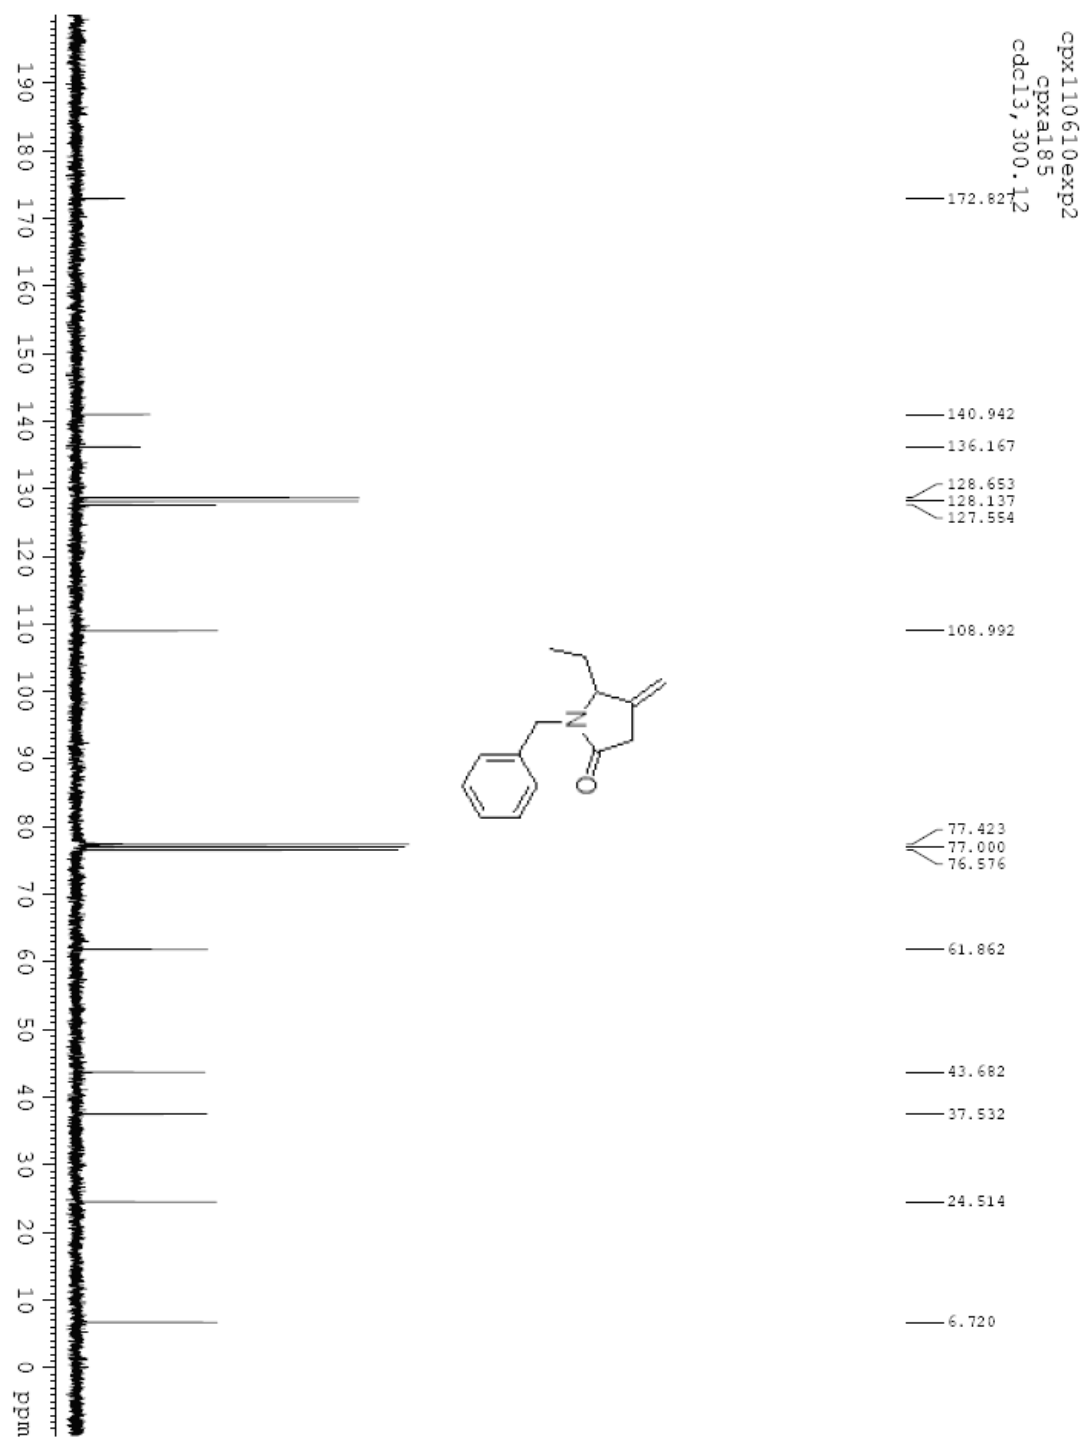

Compound **5g**:

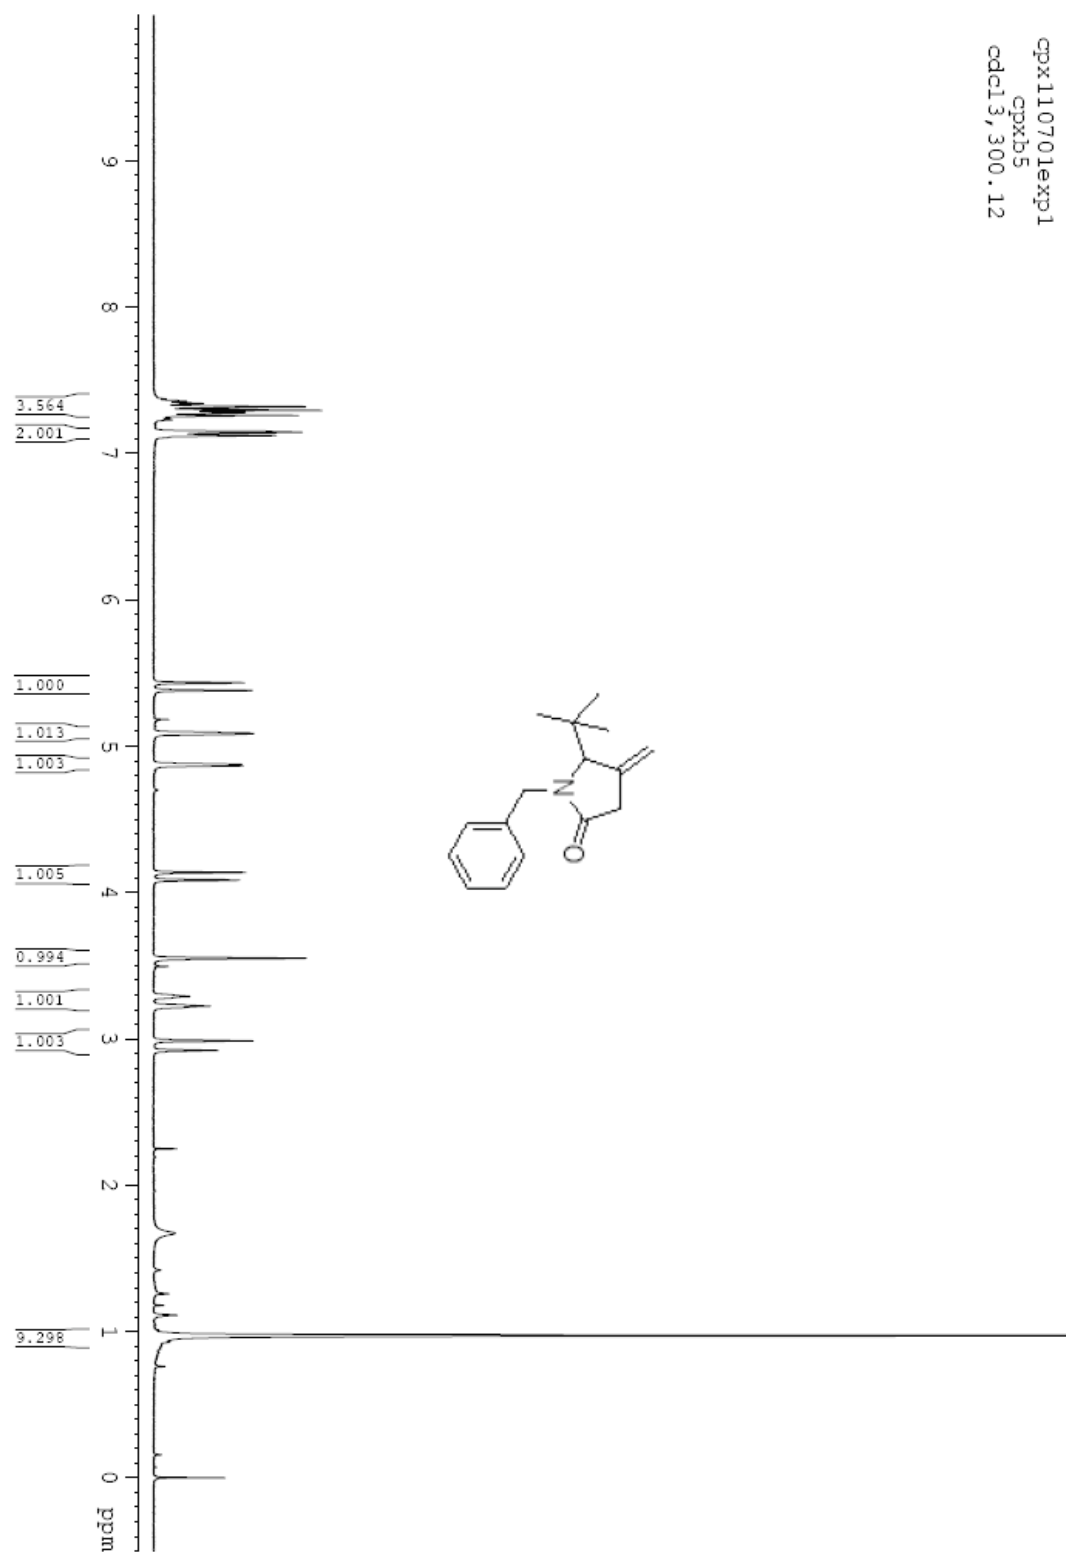

Compound **5g**:

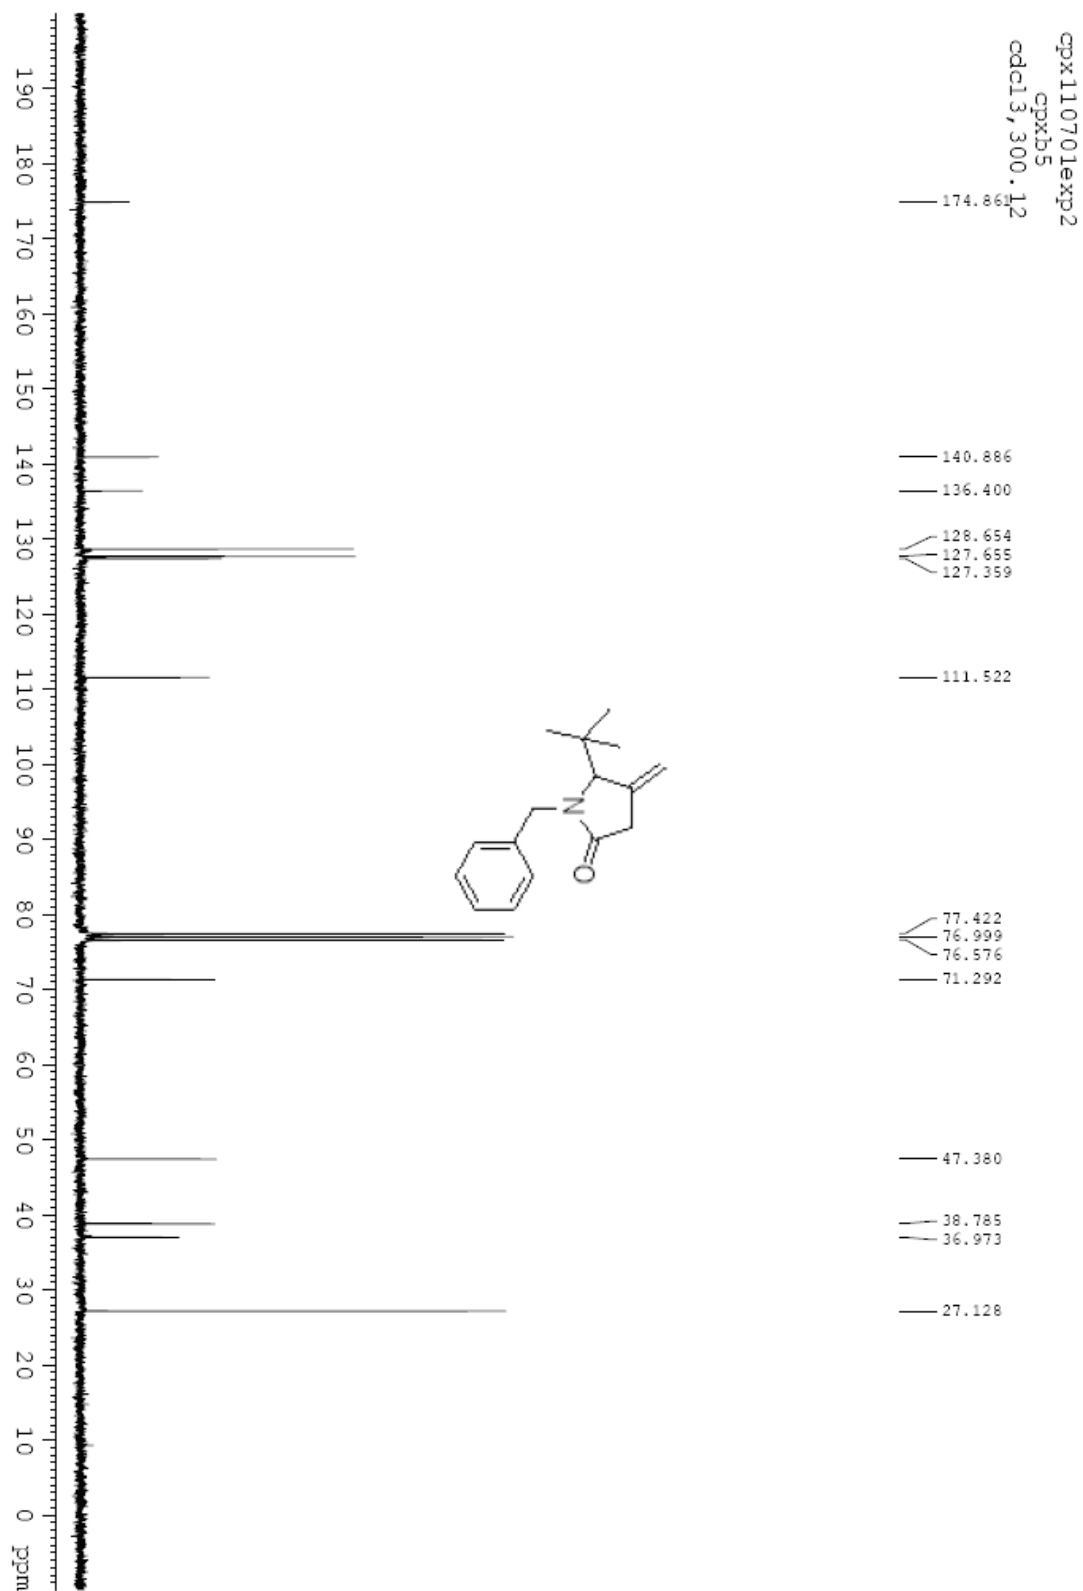

*N*-benzyl-5-isopropyl tetramic acid:

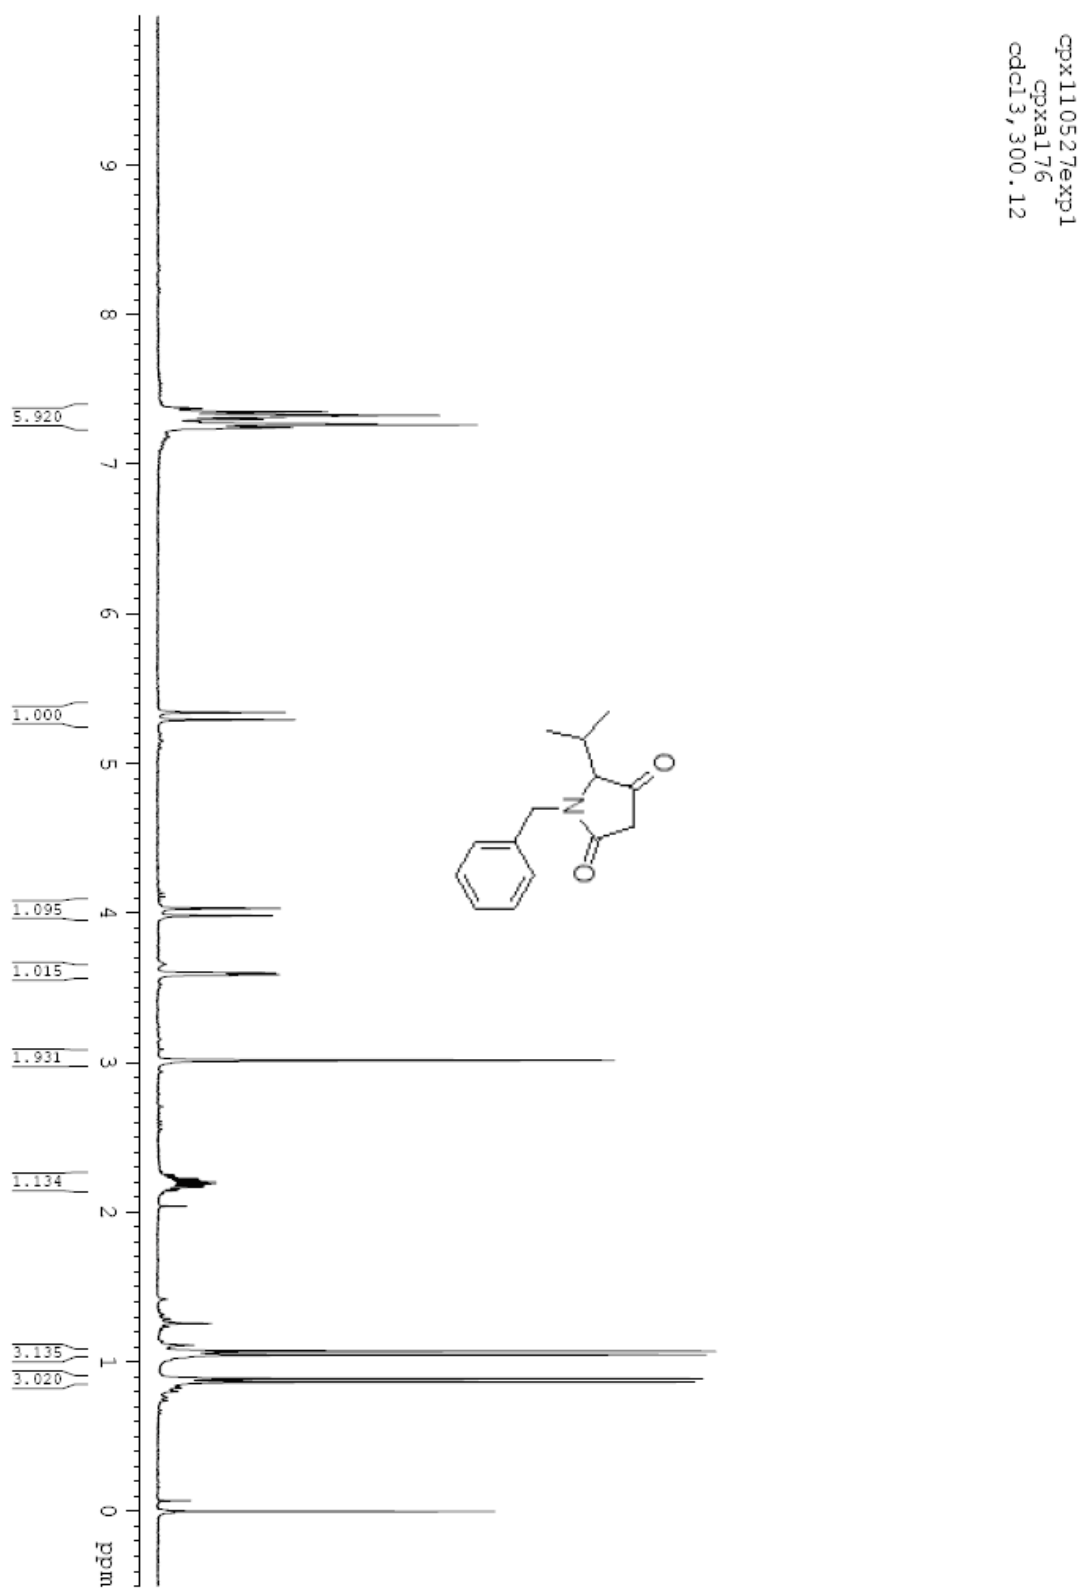



*N*-benzyl-5-isopropyl tetramic acid:

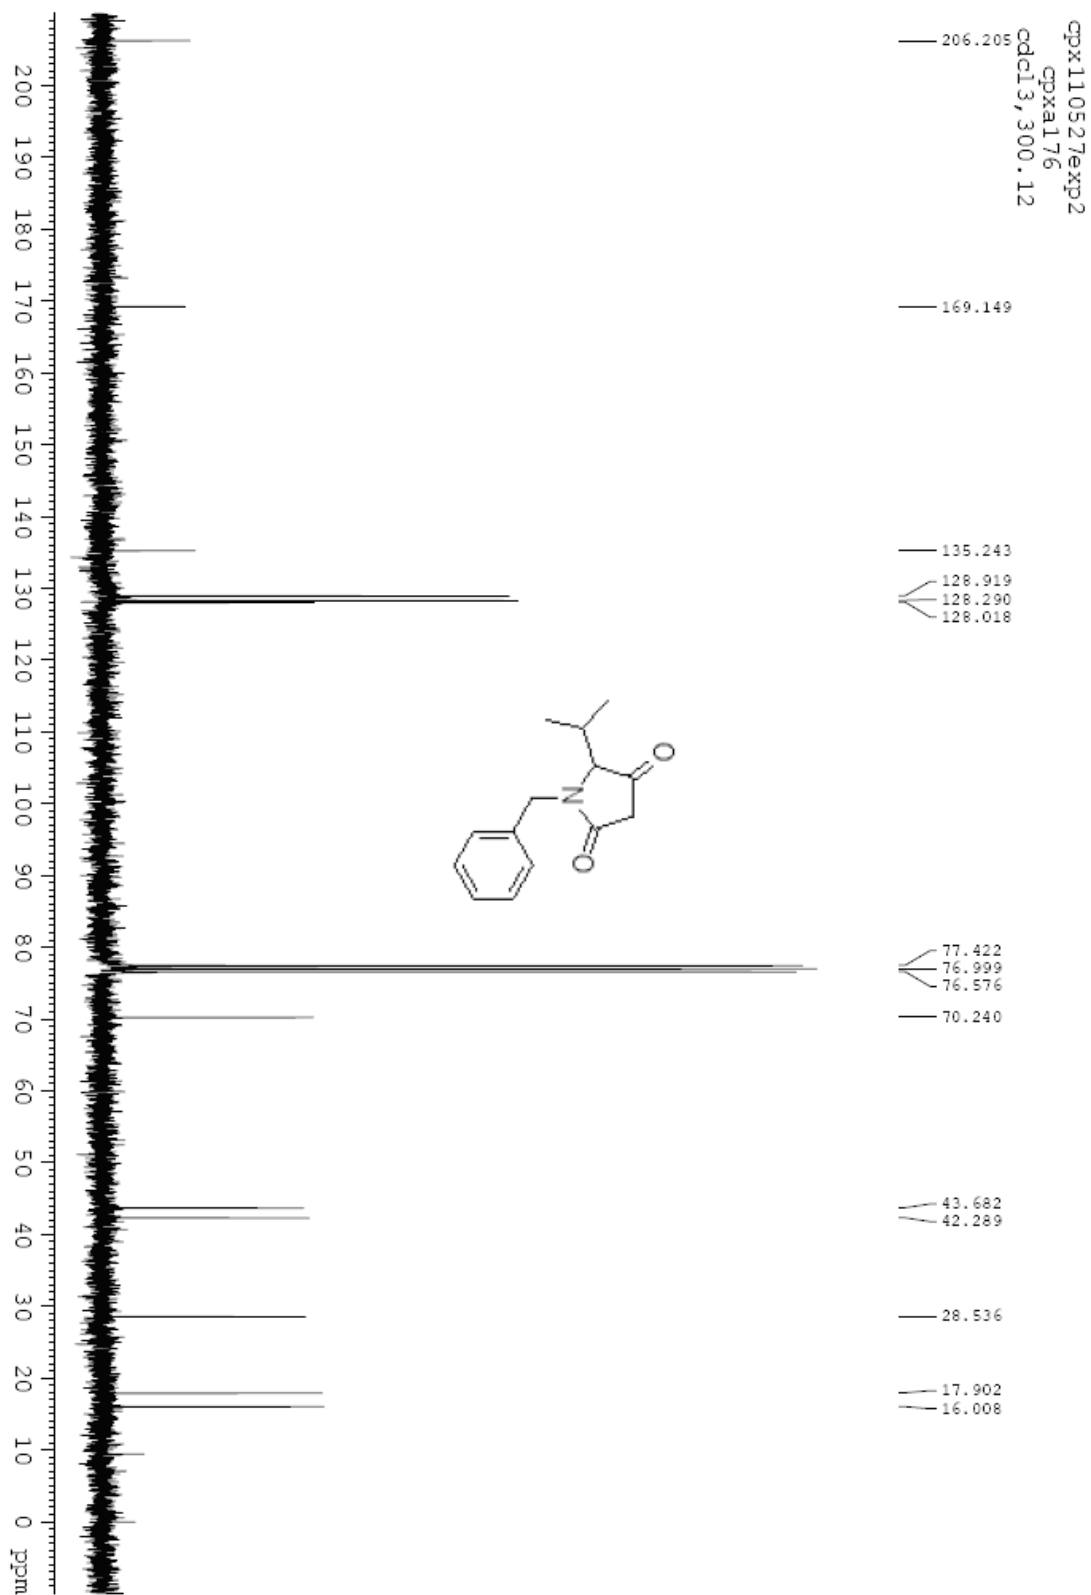

Compound **11a**:

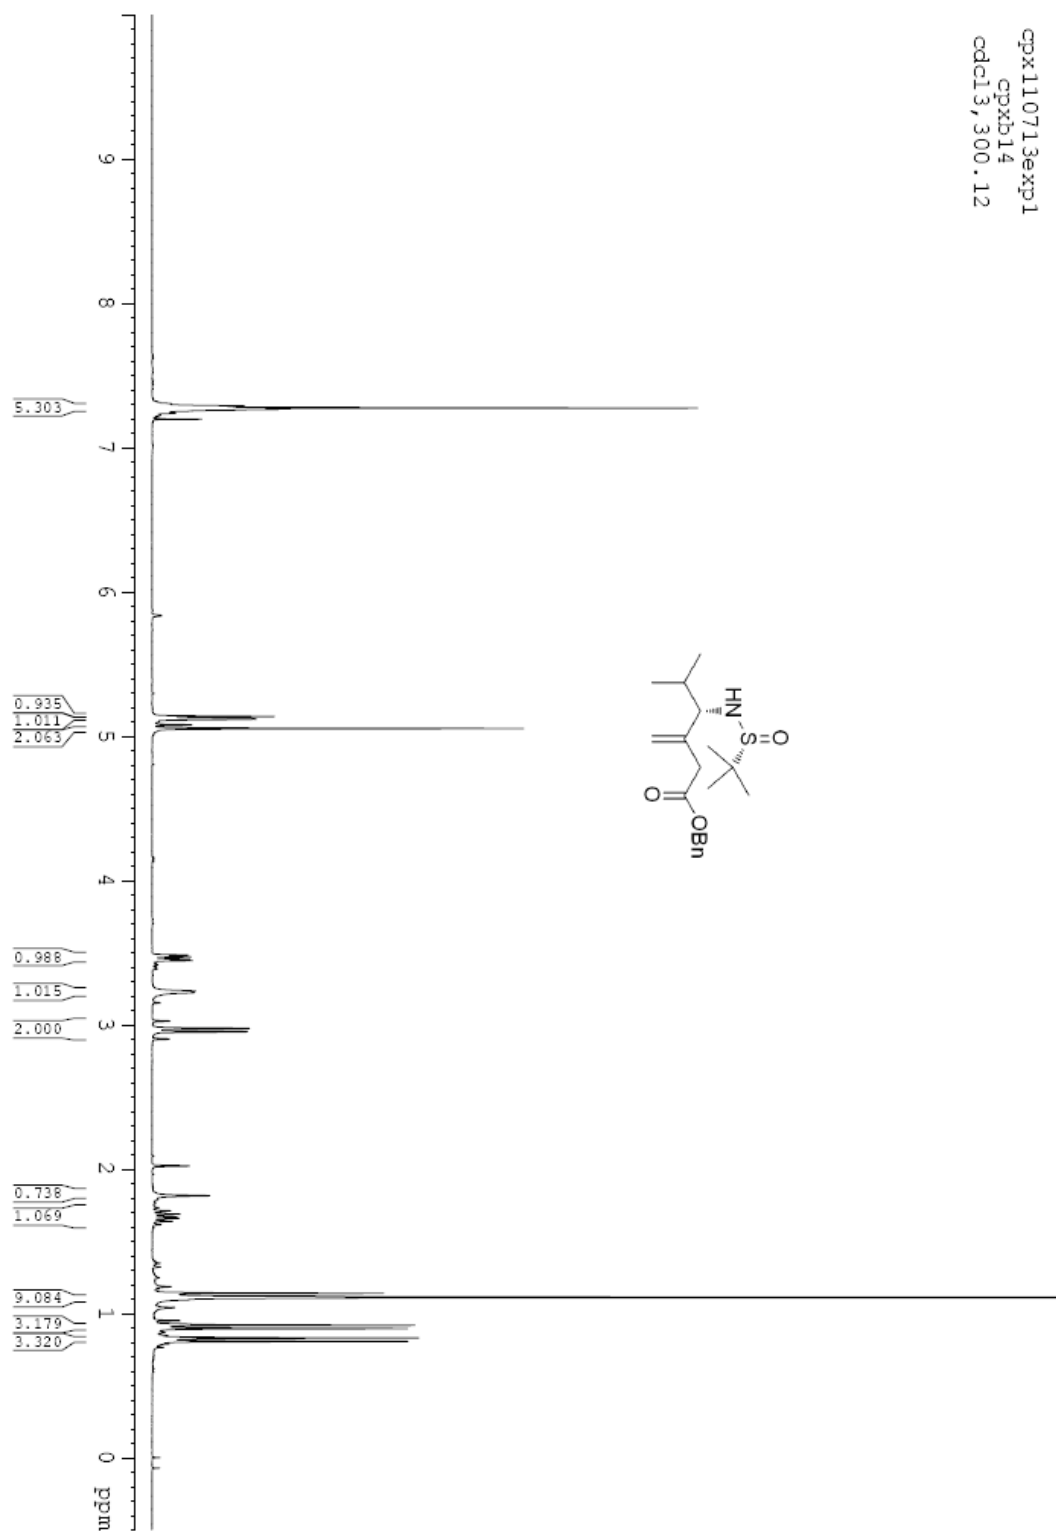

Compound **11a**:

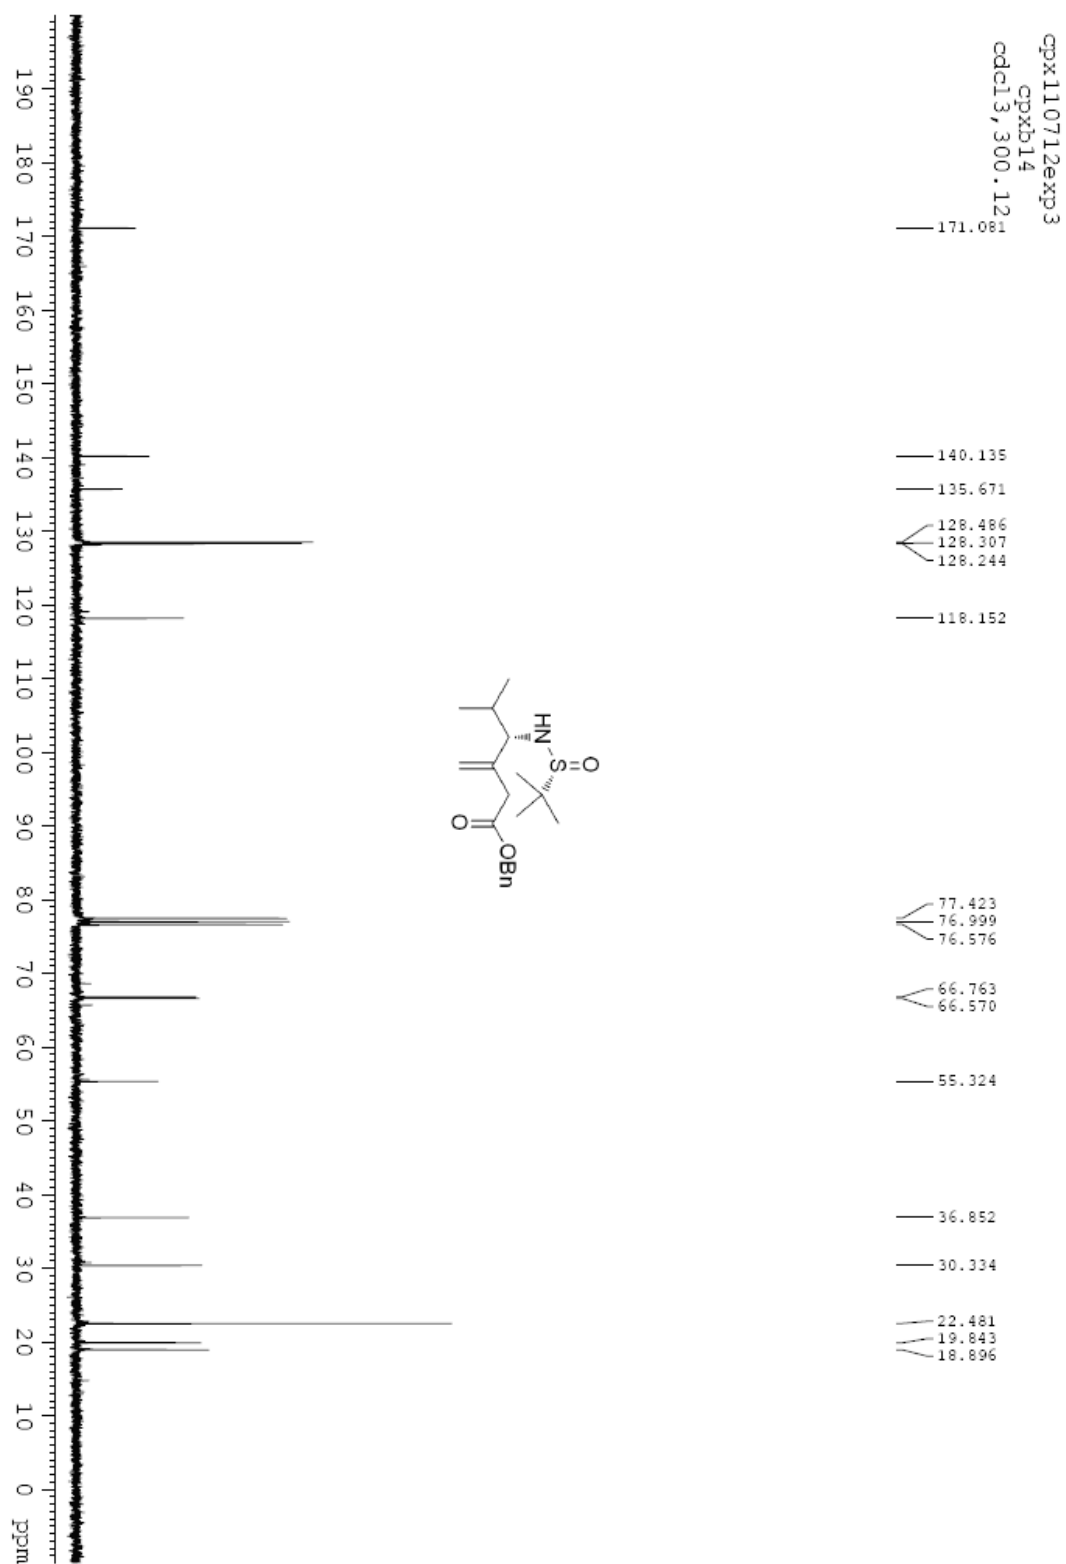

Compound **11b**:

cp1110817  
cp1110817exp3  
cp11b38  
cdcl3, 300, 13

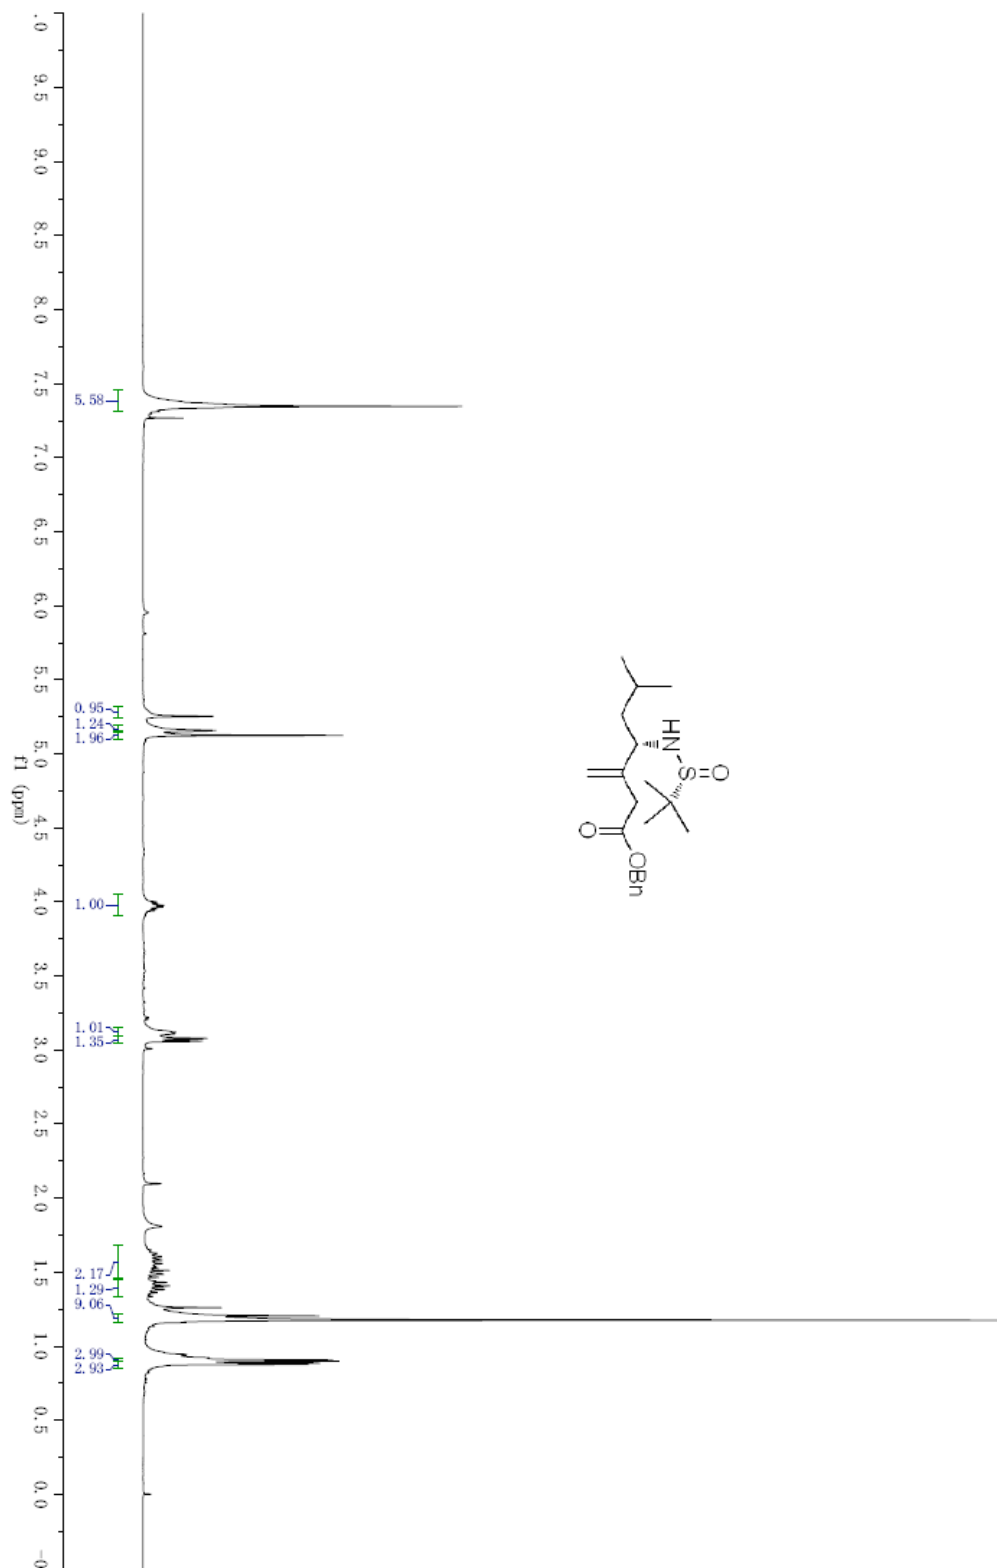

Compound **11b**:

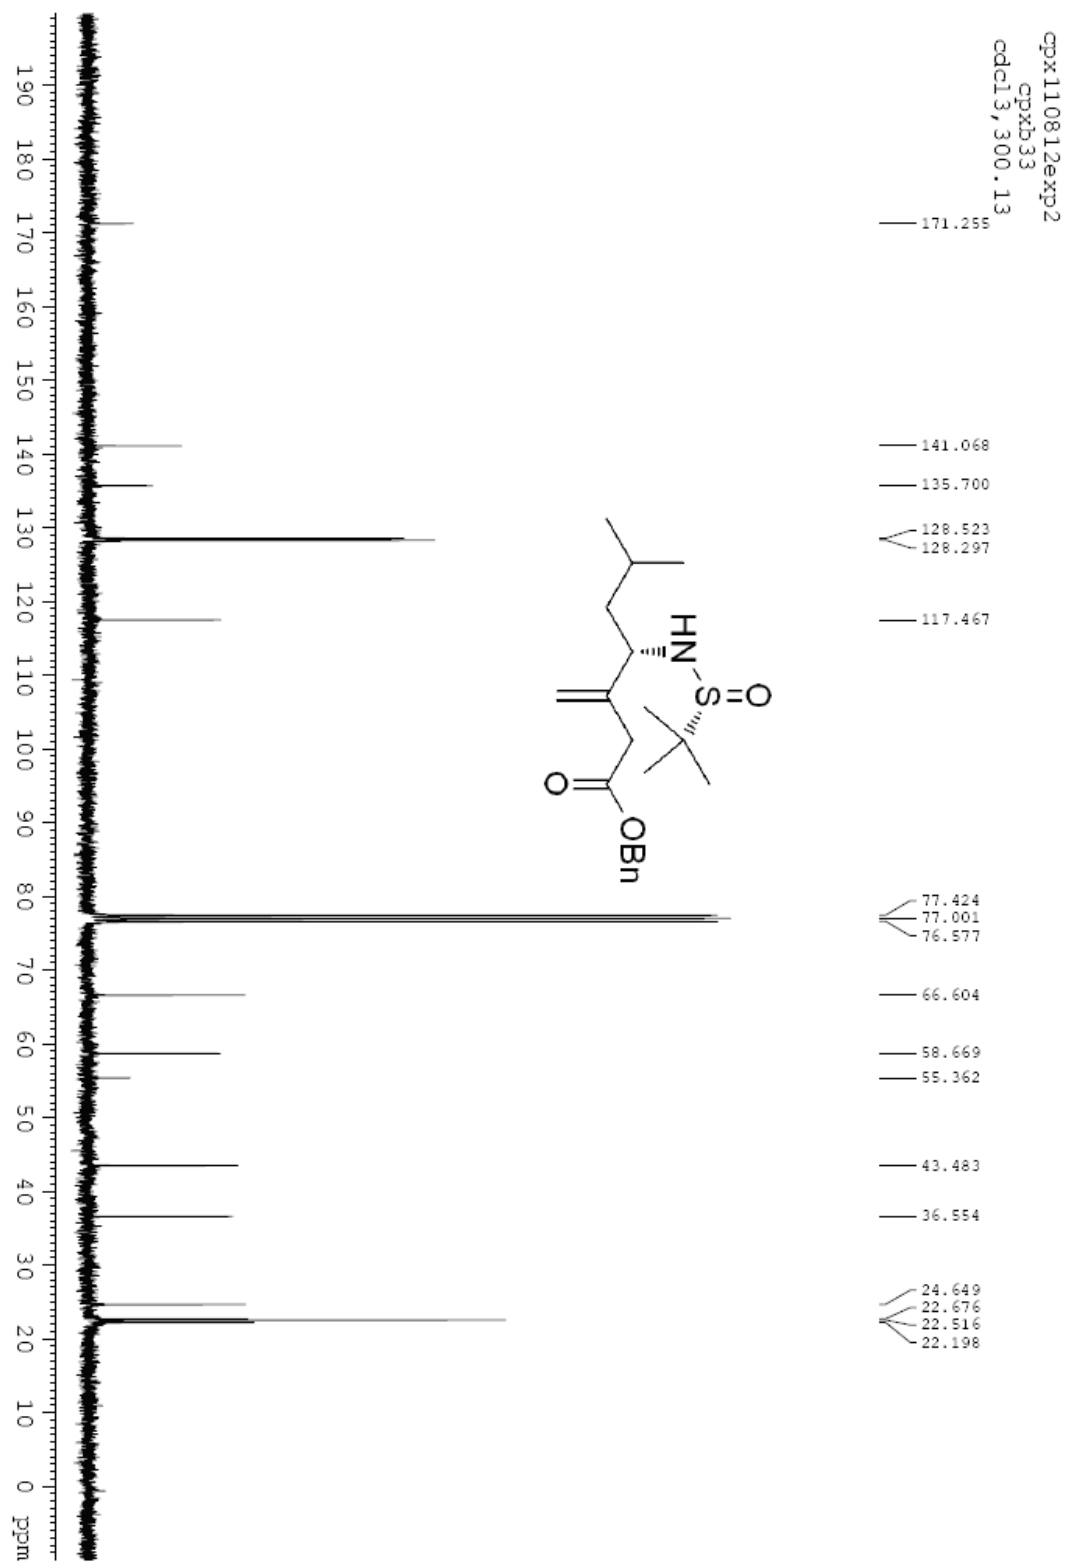

Compound **11c**:

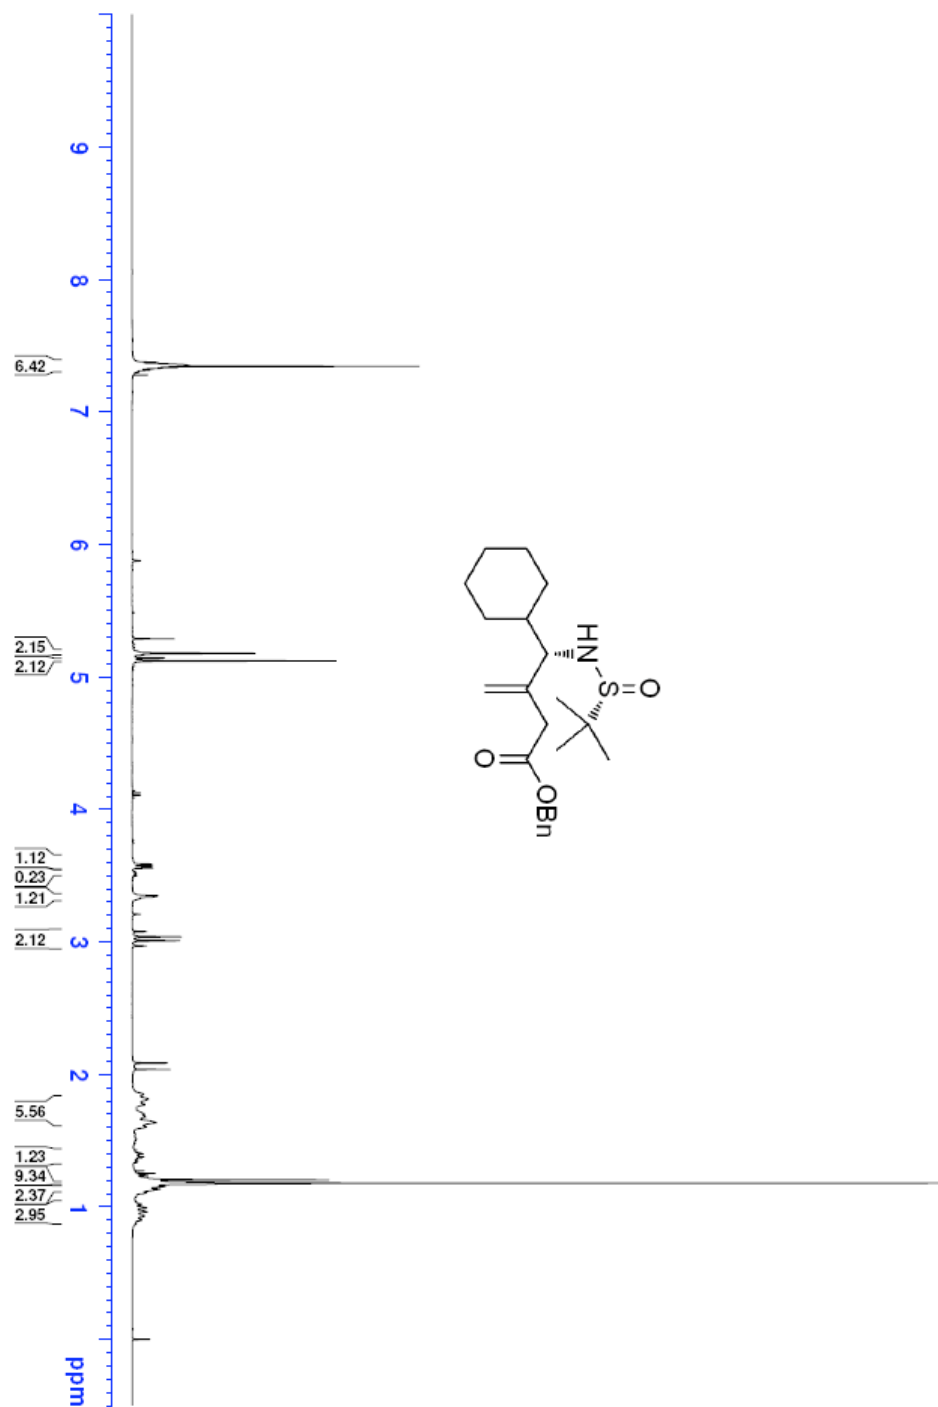

XCPD21  
 2011.10.13  
 cdcl3, 400 MHz

Compound **11c**:

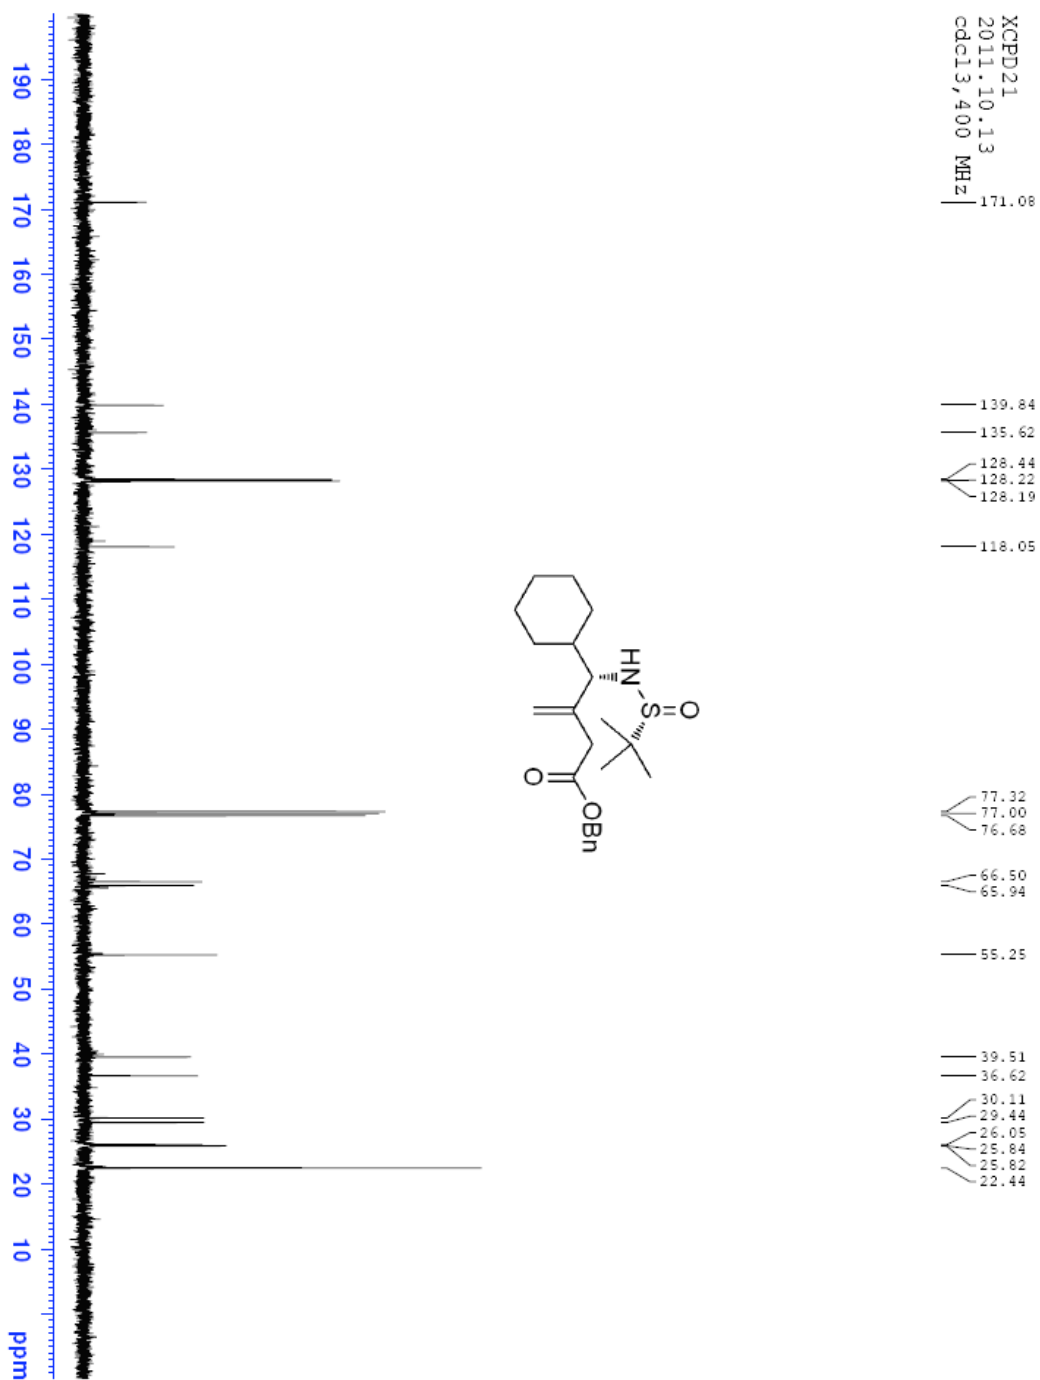

Compound **11d**:

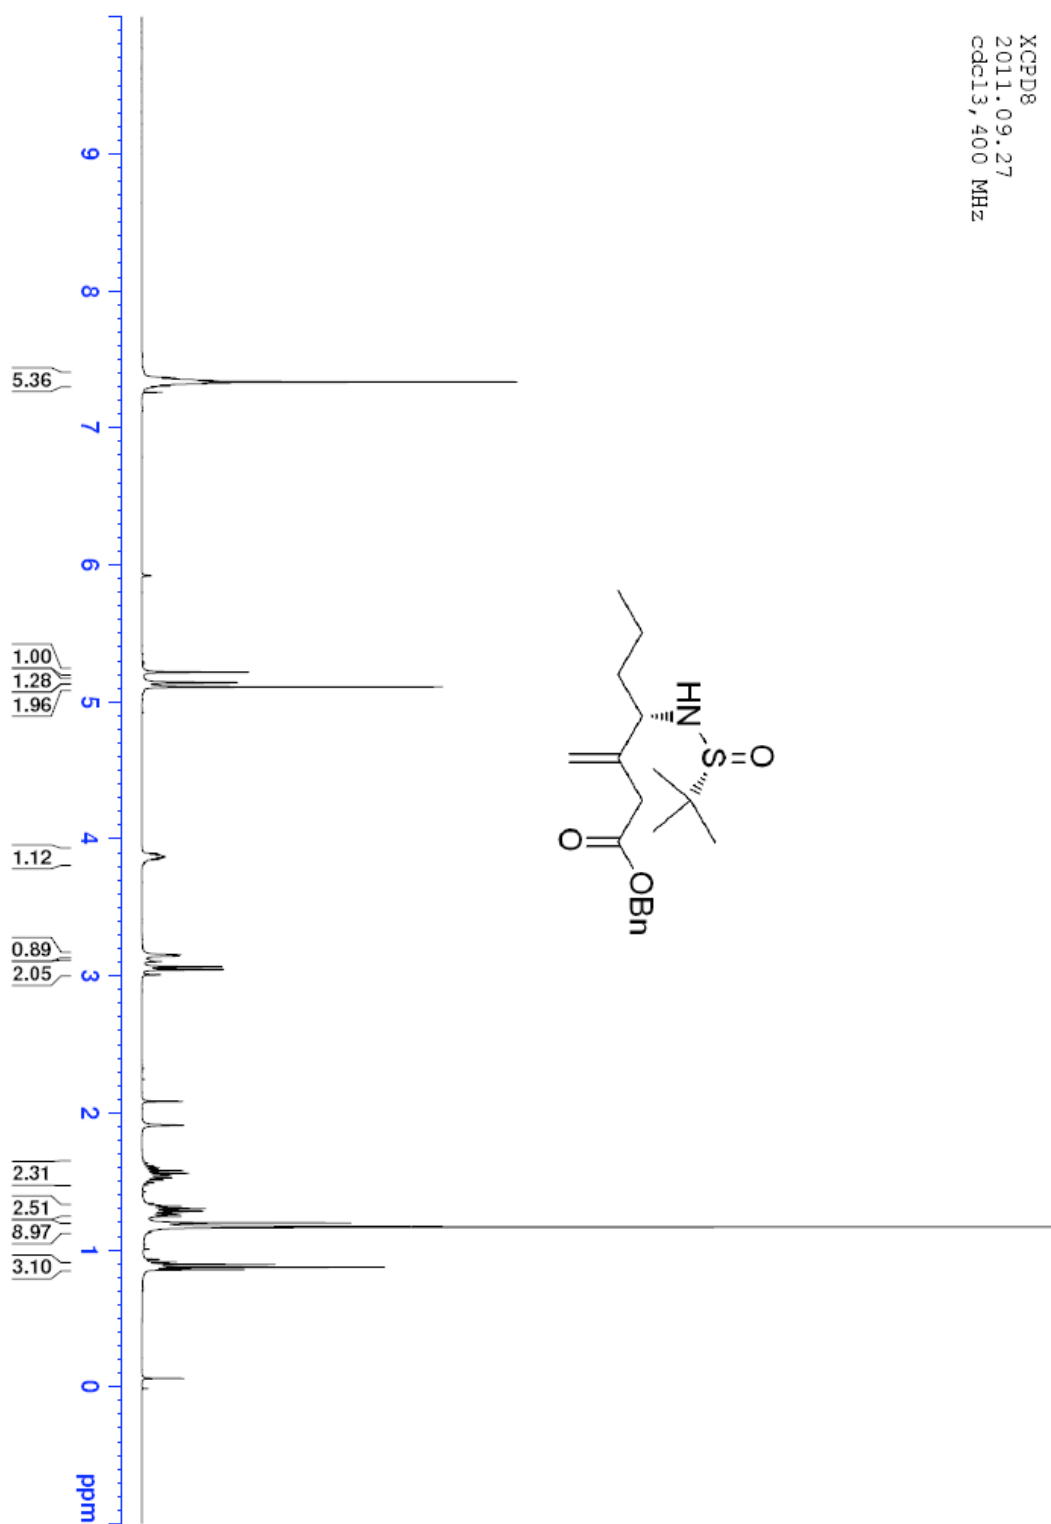



Compound **11d**:

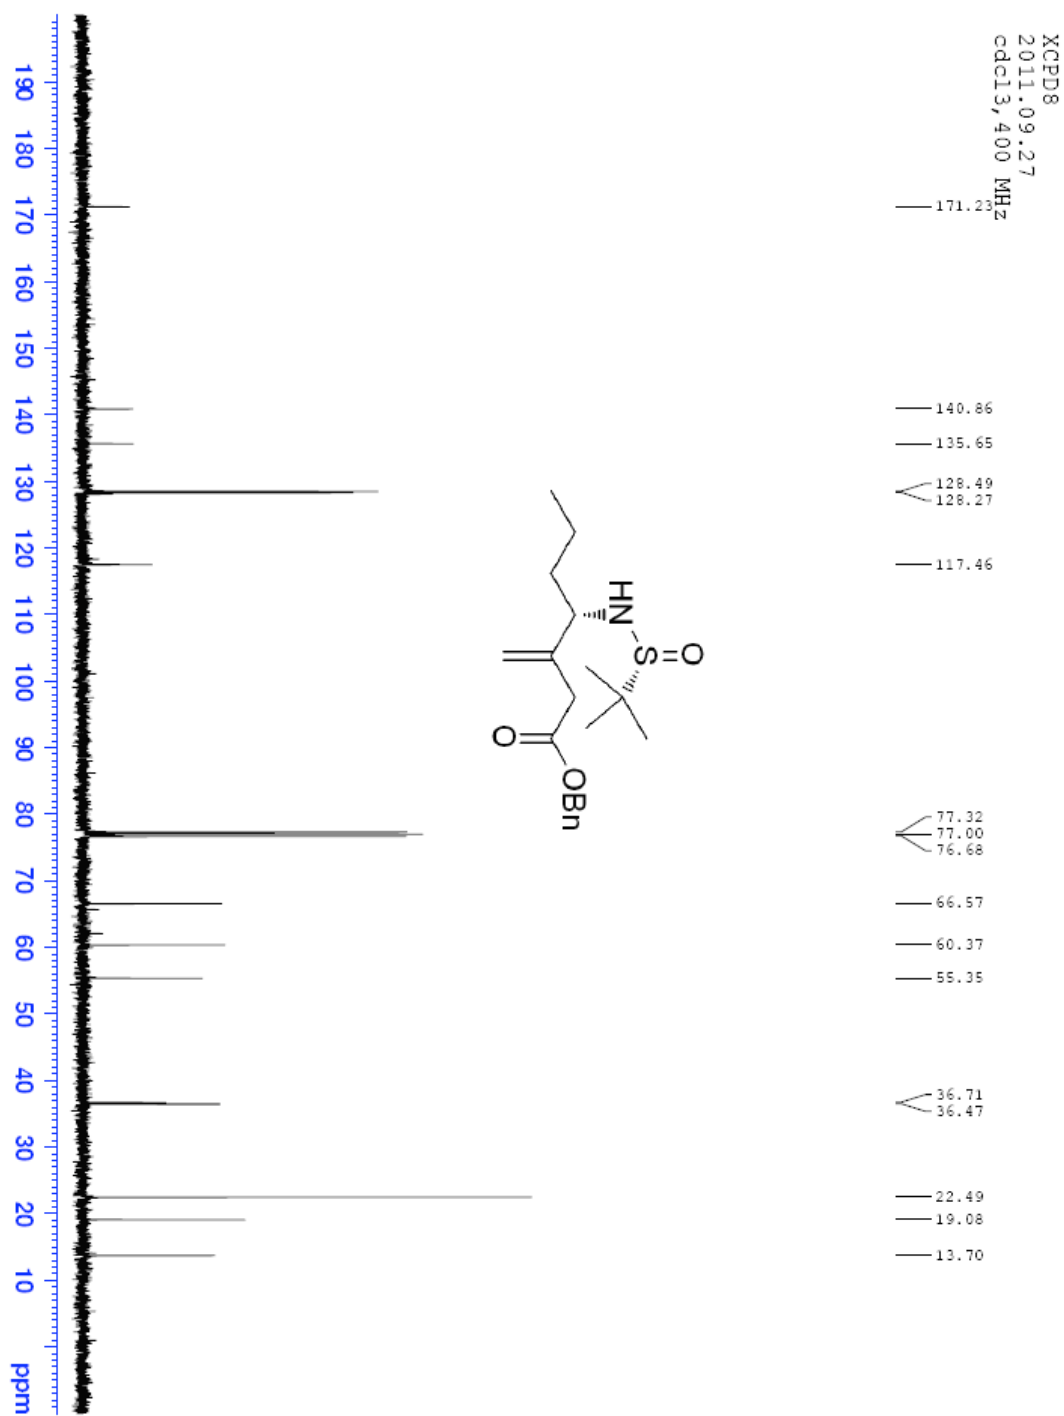

Compound **11e**:

XCPD13  
2011.10.14  
cdcl<sub>3</sub>, 400 MHz

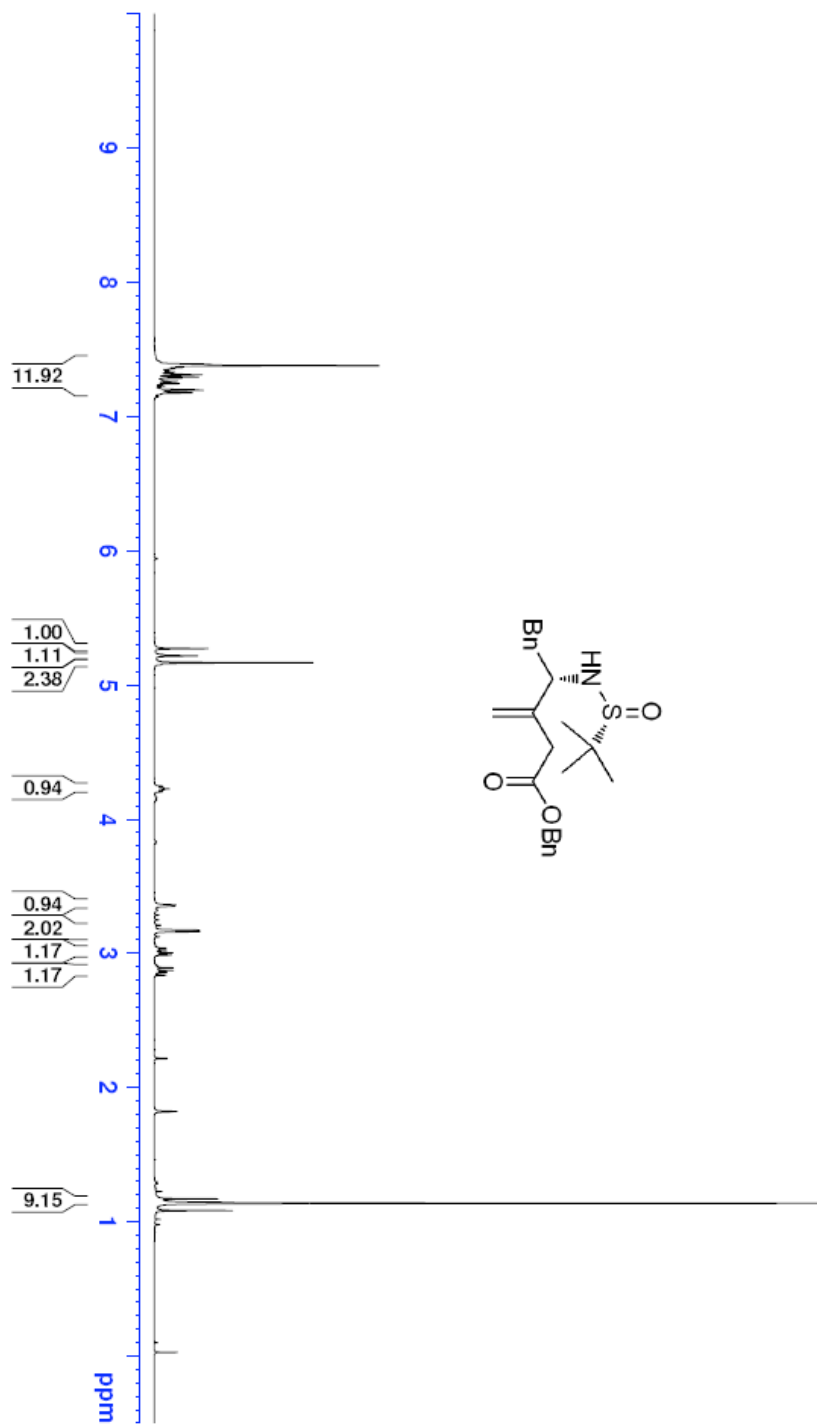

Compound **11e**:

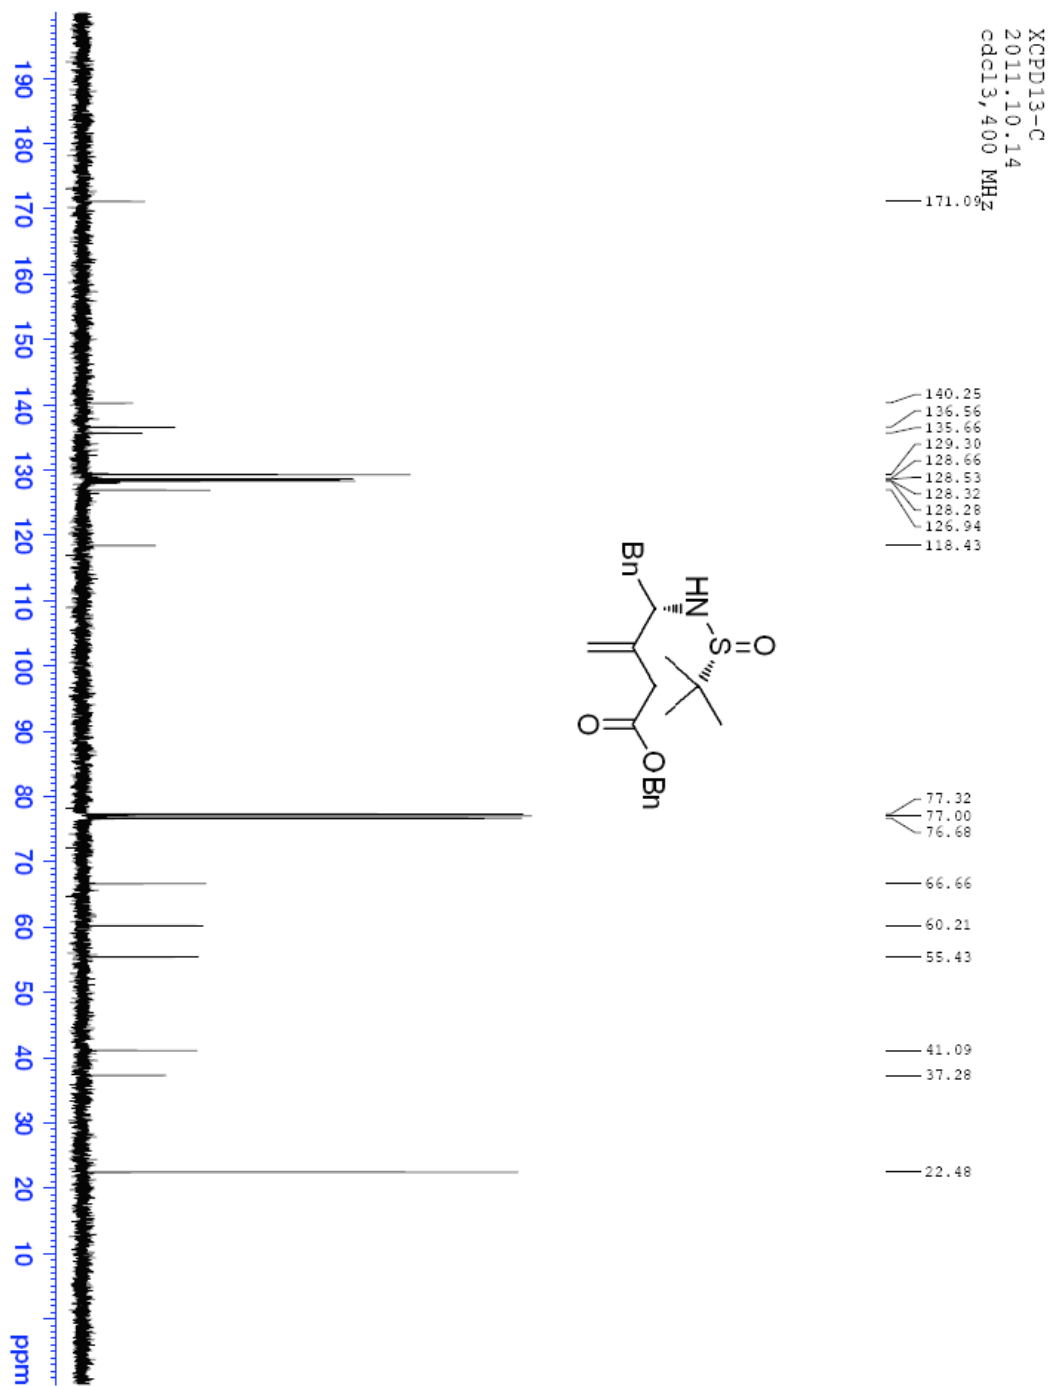

Compound **12a**:

cpx110801exp3  
cpxb26  
cdcl3, 300.13

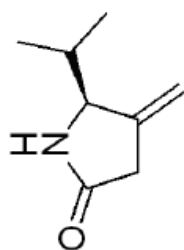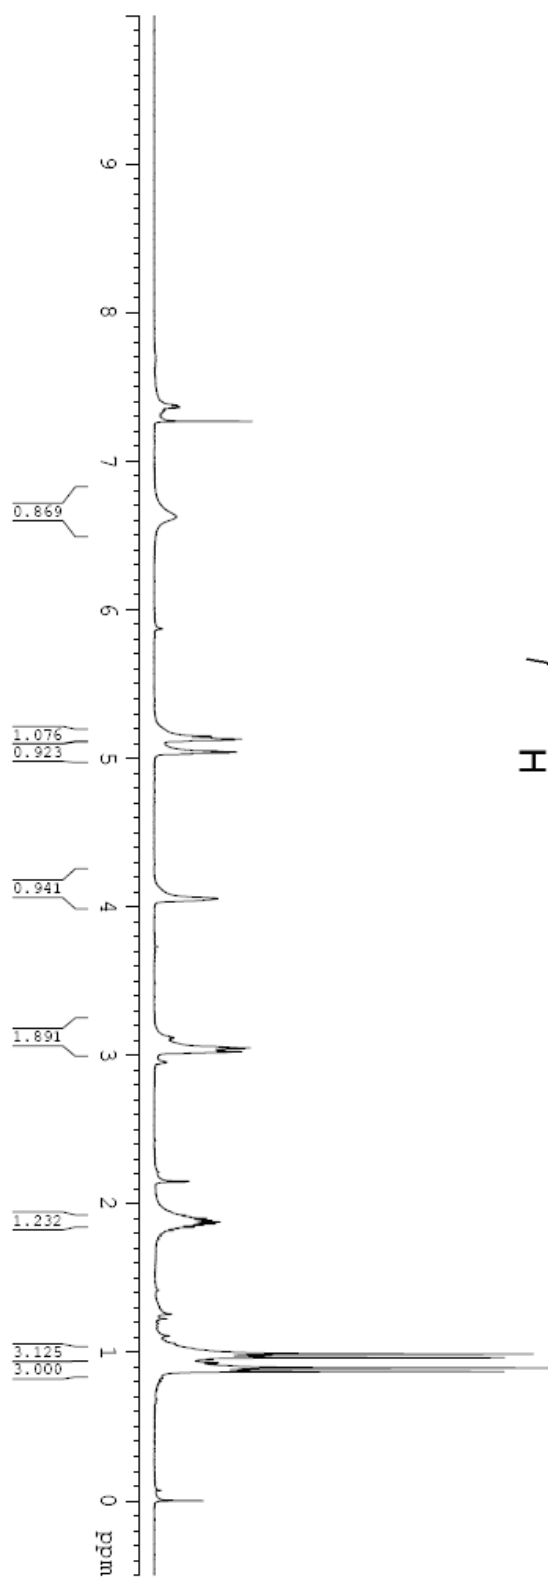

Compound **12a**:

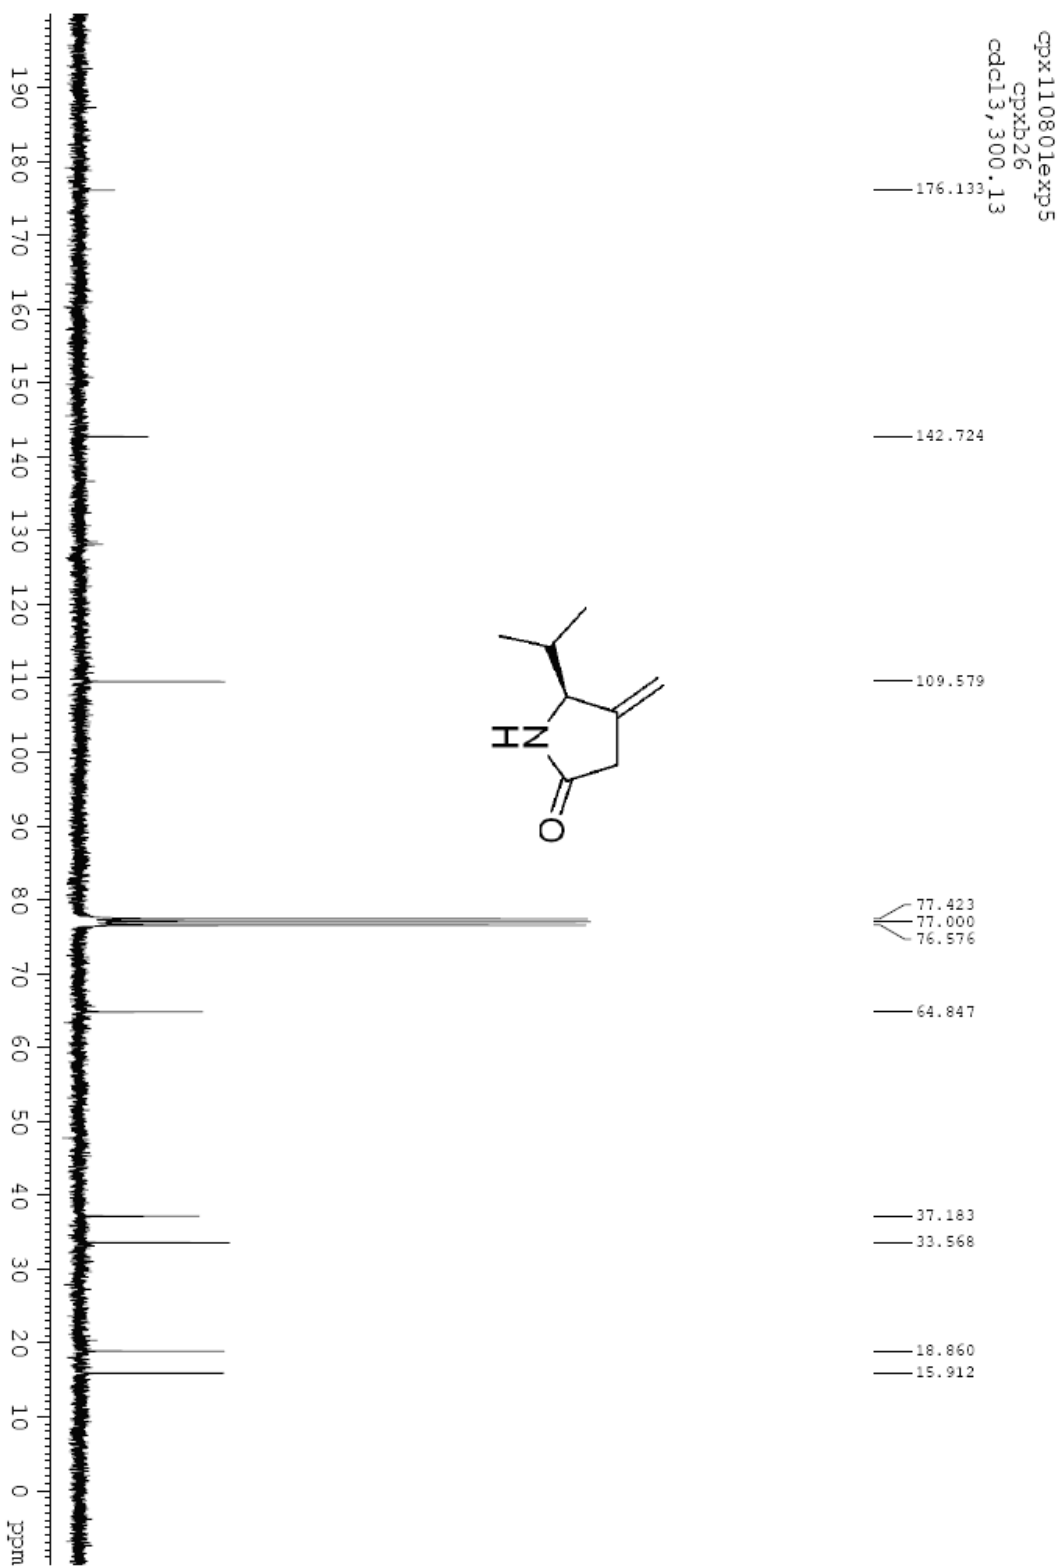

Compound **13a**:

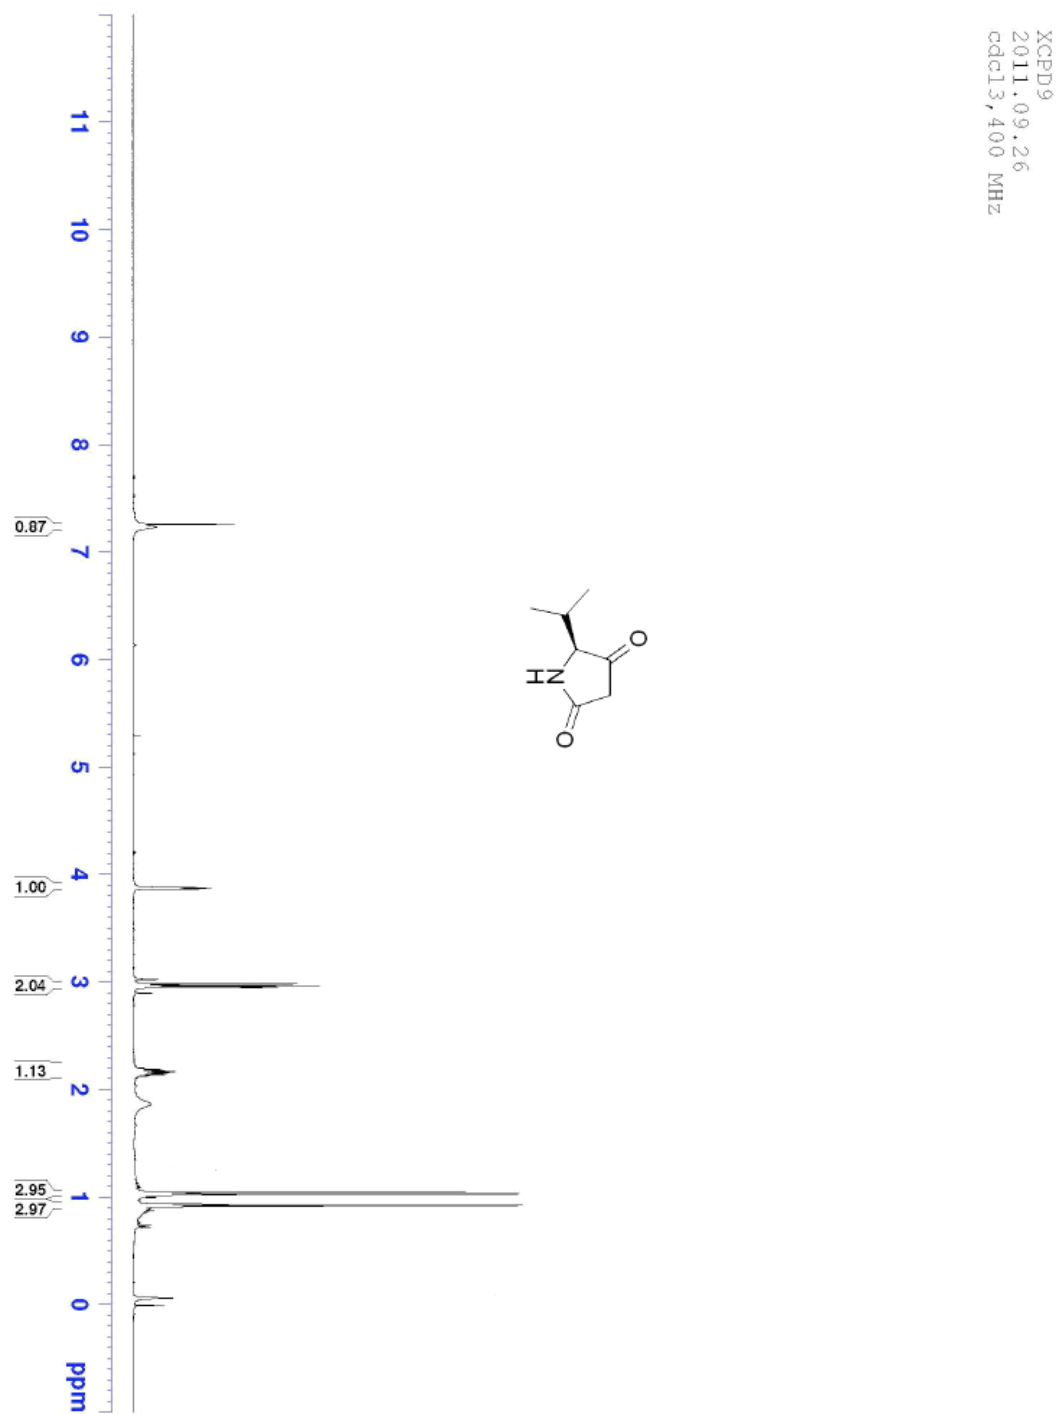

Compound **13a**:

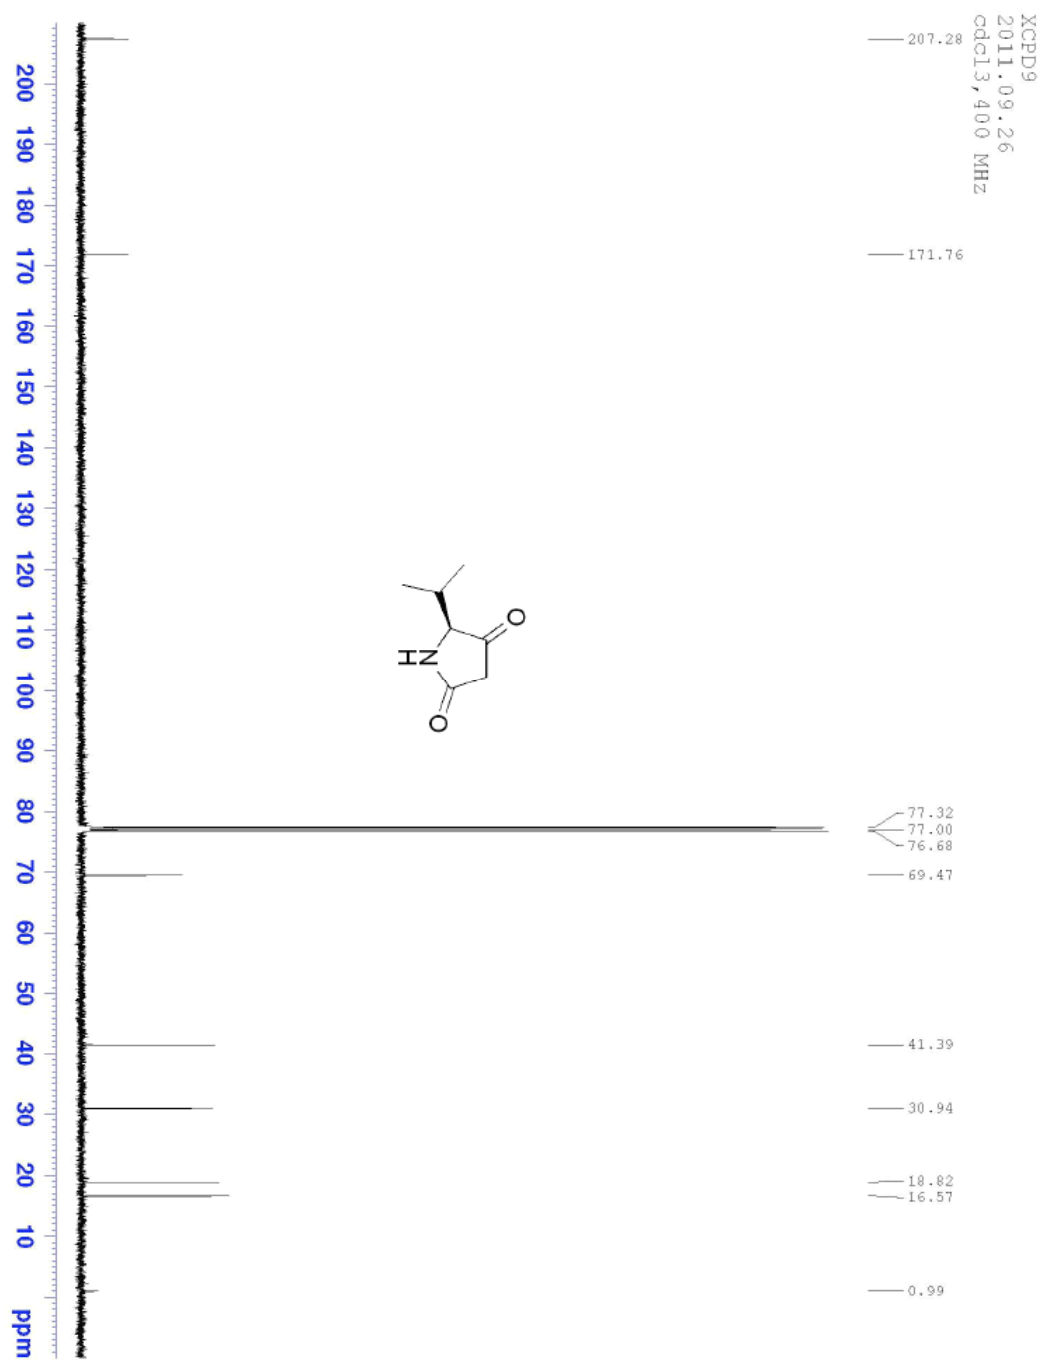

Supplement: Supplementary file 1 [file 4172446]
